# Supplementary material for: Trade-Off between Growth and Carbohydrate Accumulation in Nutrient-Limited Arthrospira sp. PCC 8005 Studied by Integrating Transcriptomic and Proteomic Approaches
Source: PLoS One. 2015 Jul 21;10(7):e0132461. doi: 10.1371/journal.pone.0132461 (PMC4509649; doi:10.1371/journal.pone.0132461)
Supplement: S1 Table — Data presented here are issued from three independent biological replicates. (XLSX) [file pone.0132461.s001.xlsx]

## Sheet: Blad1
Accession number	Gene name	Function	Log value	P value
ARTHROv5_10001	ARTHROv5_10001	conserved protein of unknown function	-0.42951	0.099493
ARTHROv5_10001_ARTHROv5_10002_ig	ARTHROv5_10001_ARTHROv5_10002_ig	---	-1.16779	0.365006
ARTHROv5_10002	ARTHROv5_10002	conserved protein of unknown function	0.208772	0.242929
ARTHROv5_10003	ARTHROv5_10003	conserved hypothetical protein	0.426505	0.123276
ARTHROv5_10003_ARTHROv5_10004_ig	ARTHROv5_10003_ARTHROv5_10004_ig	---	1.07513	0.0200546
ARTHROv5_10004	ARTHROv5_10004	hypothetical protein	0.0773895	0.79216
ARTHROv5_10005	ARTHROv5_10005	putative DegT/DnrJ/EryC1/StrS aminotransferase protein family	0.62894	0.0157089
ARTHROv5_10006	ARTHROv5_10006	putative Acetyltransferase, LpxA-like	1.0792	0.00254084
ARTHROv5_10007	ARTHROv5_10007	putative NAD(P)-dependent oxidoreductase, GFO/IDH/MOCA family	1.15512	0.00390293
ARTHROv5_10008	ARTHROv5_10008	putative UDP-N-acetyl-D-mannosamine 6-dehydrogenase	-0.204651	0.170565
ARTHROv5_10008_ARTHROv5_10009_ig	ARTHROv5_10008_ARTHROv5_10009_ig	---	-0.048363	0.753937
ARTHROv5_10009	ARTHROv5_10009	hypothetical protein	0.147372	0.323276
ARTHROv5_10009_ARTHROv5_10010_ig	ARTHROv5_10009_ARTHROv5_10010_ig	---	0.609723	0.0614744
ARTHROv5_10010	ARTHROv5_10010	conserved protein of unknown function	0.833311	0.0915479
ARTHROv5_10010_ARTHROv5_10011_ig	ARTHROv5_10010_ARTHROv5_10011_ig	---	2.01758	0.0444238
ARTHROv5_10011	ARTHROv5_10011	conserved hypothetical protein	1.33585	0.00392821
ARTHROv5_10012	ARTHROv5_10012	conserved hypothetical protein	0.308824	0.0822206
ARTHROv5_10012_ARTHROv5_10013_ig	ARTHROv5_10012_ARTHROv5_10013_ig	---	-0.110332	0.676523
ARTHROv5_10013	ARTHROv5_10013	conserved protein of unknown function	0.461163	0.0283553
ARTHROv5_10013_ARTHROv5_10014_ig	ARTHROv5_10013_ARTHROv5_10014_ig	---	0.665027	0.036646
ARTHROv5_10014	ARTHROv5_10014	conserved hypothetical protein	0.99248	0.0804678
ARTHROv5_10015	ARTHROv5_10015	conserved hypothetical protein	1.41238	0.00064281
ARTHROv5_10015_ARTHROv5_10016_ig	ARTHROv5_10015_ARTHROv5_10016_ig	---	0.275845	0.23239
ARTHROv5_10016	ARTHROv5_10016	putative FdxN element excision controlling factor protein, XisH-like	-0.265814	0.401635
ARTHROv5_10017	ARTHROv5_10017	putative FdxN element excision controlling factor protein, XisL-like	-0.164066	0.707628
ARTHROv5_10018	ARTHROv5_10018	protein of unknown function	-0.24627	0.682668
ARTHROv5_10019	ARTHROv5_10019	hypothetical protein	0.515486	0.224552
ARTHROv5_10020	ARTHROv5_10020	conserved protein of unknown function	0.283271	0.268985
ARTHROv5_10021	ARTHROv5_10021	conserved protein of unknown function	0.441234	0.526086
ARTHROv5_10021_ARTHROv5_10022_ig	ARTHROv5_10021_ARTHROv5_10022_ig	---	0.84973	0.00868768
ARTHROv5_10022	ARTHROv5_10022	conserved hypothetical protein	0.572997	0.00827187
ARTHROv5_10022_ARTHROv5_10023_ig	ARTHROv5_10022_ARTHROv5_10023_ig	---	0.993449	0.0066048
ARTHROv5_10023	ARTHROv5_10023	conserved hypothetical protein (fragment)	0.543464	0.0256887
ARTHROv5_10024	ARTHROv5_10024	putative plasmid stabilization system protein	0.183545	0.295772
ARTHROv5_10025	ARTHROv5_10025	hypothetical protein	-0.0221647	0.915585
ARTHROv5_10025_ARTHROv5_10026_ig	ARTHROv5_10025_ARTHROv5_10026_ig	---	0.195989	0.330146
ARTHROv5_10026	ARTHROv5_10026	conserved hypothetical protein	-0.014295	0.925083
ARTHROv5_10027	ARTHROv5_10027	hypothetical protein	0.268848	0.0564637
ARTHROv5_10027_ARTHROv5_10028_ig	ARTHROv5_10027_ARTHROv5_10028_ig	---	0.0506662	0.885911
ARTHROv5_10028	ARTHROv5_10028	conserved hypothetical protein	0.7425	0.0624505
ARTHROv5_10029	ARTHROv5_10029	conserved hypothetical protein	0.996455	0.00874802
ARTHROv5_10029_ARTHROv5_10030_ig	ARTHROv5_10029_ARTHROv5_10030_ig	---	1.24974	0.00189895
ARTHROv5_10030	ARTHROv5_10030	conserved hypothetical protein	1.23137	0.00167767
ARTHROv5_10030_ARTHROv5_10031_ig	ARTHROv5_10030_ARTHROv5_10031_ig	---	0.577222	0.0733126
ARTHROv5_10031	ARTHROv5_10031	conserved protein of unknown function	0.0427004	0.904033
ARTHROv5_10032	ARTHROv5_10032	conserved hypothetical protein	0.928911	0.00498583
ARTHROv5_10033	ARTHROv5_10033	conserved hypothetical protein	0.721908	0.006241
ARTHROv5_10033_ARTHROv5_10034_ig	ARTHROv5_10033_ARTHROv5_10034_ig	---	1.19298	0.0166212
ARTHROv5_10034	ARTHROv5_10034	putative 2-oxoisovalerate dehydrogenase, E1 component beta subunit	1.08243	0.00600431
ARTHROv5_10034_ARTHROv5_10035_ig	ARTHROv5_10034_ARTHROv5_10035_ig	---	1.11161	0.0239008
ARTHROv5_10035	ARTHROv5_10035	conserved protein of unknown function	1.29634	0.0531984
ARTHROv5_10036	ARTHROv5_10036	conserved protein of unknown function	-0.229206	0.515684
ARTHROv5_10036_ARTHROv5_10037_ig	ARTHROv5_10036_ARTHROv5_10037_ig	---	0.63884	0.00874257
ARTHROv5_10037	ARTHROv5_10037	conserved protein of unknown function	0.0528076	0.855155
ARTHROv5_10037_ARTHROv5_10038_ig	ARTHROv5_10037_ARTHROv5_10038_ig	---	0.680708	0.359601
ARTHROv5_10038	ARTHROv5_10038	protein of unknown function	0.522061	0.224565
ARTHROv5_10039	ARTHROv5_10039	conserved protein of unknown function	0.484162	0.0956529
ARTHROv5_10039_ARTHROv5_10040_ig	ARTHROv5_10039_ARTHROv5_10040_ig	---	0.721925	0.00167307
ARTHROv5_10040	ARTHROv5_10040	YcfA-like	0.0823184	0.774447
ARTHROv5_10041	ARTHROv5_10041	conserved protein of unknown function	0.27857	0.638822
ARTHROv5_10041_ARTHROv5_10042_ig	ARTHROv5_10041_ARTHROv5_10042_ig	---	1.34583	0.472924
ARTHROv5_10042	ARTHROv5_10042	conserved protein of unknown function	-0.74817	0.0105094
ARTHROv5_10042_ARTHROv5_10043_ig	ARTHROv5_10042_ARTHROv5_10043_ig	---	-0.95389	0.0114898
ARTHROv5_10043	ARTHROv5_10043	hypothetical protein	0.721007	0.00179453
ARTHROv5_10044	ARTHROv5_10044	putative short-chain alcohol dehydrogenase (fragment)	0.863903	0.0122367
ARTHROv5_10044_ARTHROv5_10045_ig	ARTHROv5_10044_ARTHROv5_10045_ig	---	0.267474	0.597998
ARTHROv5_10045	ARTHROv5_10045	conserved hypothetical protein	0.154631	0.678351
ARTHROv5_10046	ARTHROv5_10046	conserved hypothetical protein	0.414474	0.110321
ARTHROv5_10046_ARTHROv5_10047_ig	ARTHROv5_10046_ARTHROv5_10047_ig	---	0.593564	0.0342137
ARTHROv5_10047	ARTHROv5_10047	conserved protein of unknown function	-0.11974	0.88666
ARTHROv5_10047_ARTHROv5_10048_ig	ARTHROv5_10047_ARTHROv5_10048_ig	---	0.457536	0.0823667
ARTHROv5_10048	ARTHROv5_10048	conserved hypothetical protein	1.14657	0.0260485
ARTHROv5_10049	ARTHROv5_10049	conserved hypothetical protein	1.07902	0.00187383
ARTHROv5_10050	ARTHROv5_10050	conserved hypothetical protein	0.40792	0.198286
ARTHROv5_10050_ARTHROv5_10051_ig	ARTHROv5_10050_ARTHROv5_10051_ig	---	0.365728	0.144844
ARTHROv5_10051	ARTHROv5_10051	conserved hypothetical protein	0.0924149	0.656755
ARTHROv5_10052	ARTHROv5_10052	conserved hypothetical protein	0.394901	0.0508616
ARTHROv5_10052_ARTHROv5_10053_ig	ARTHROv5_10052_ARTHROv5_10053_ig	---	0.329025	0.297858
ARTHROv5_10053	ARTHROv5_10053	putative esterase, SGNH hydrolase-like	0.393225	0.186648
ARTHROv5_10053_ARTHROv5_10054_ig	ARTHROv5_10053_ARTHROv5_10054_ig	---	0.448623	0.514325
ARTHROv5_10054	ARTHROv5_10054	hypothetical protein	0.776018	0.0648452
ARTHROv5_10054_ARTHROv5_10055_ig	ARTHROv5_10054_ARTHROv5_10055_ig	---	0.350753	0.0329875
ARTHROv5_10055	ARTHROv5_10055	conserved hypothetical protein	0.70903	0.00700358
ARTHROv5_10056	cbbZ	Phosphoglycolate phosphatase (PGP)	-0.297464	0.199961
ARTHROv5_10057	ARTHROv5_10057	conserved hypothetical protein	-1.39636	0.00124187
ARTHROv5_10058	ARTHROv5_10058	conserved hypothetical protein	-0.746033	0.00182606
ARTHROv5_10058_ARTHROv5_10059_ig	ARTHROv5_10058_ARTHROv5_10059_ig	---	-0.935834	0.00233786
ARTHROv5_10059	ARTHROv5_10059	conserved hypothetical protein	-0.637627	0.0119148
ARTHROv5_10059_ARTHROv5_10060_ig	ARTHROv5_10059_ARTHROv5_10060_ig	---	0.0117065	0.973476
ARTHROv5_10060	ARTHROv5_10060	conserved hypothetical protein	0.175761	0.328566
ARTHROv5_10061	asnB	Asparagine synthase (Glutamine-hydrolyzing)	0.310345	0.198584
ARTHROv5_10061_ARTHROv5_10062_ig	ARTHROv5_10061_ARTHROv5_10062_ig	---	0.488709	0.259009
ARTHROv5_10062	purN	phosphoribosylglycinamide formyltransferase	1.64922	0.00115892
ARTHROv5_10062_ARTHROv5_10063_ig	ARTHROv5_10062_ARTHROv5_10063_ig	---	1.08695	0.00253066
ARTHROv5_10063	leuD	3-isopropylmalate dehydratase small subunit	0.960621	0.0010309
ARTHROv5_10063_ARTHROv5_10064_ig	ARTHROv5_10063_ARTHROv5_10064_ig	---	1.249	0.00169233
ARTHROv5_10064	leuC	3-isopropylmalate dehydratase large subunit	0.802238	0.0060801
ARTHROv5_10064_ARTHROv5_10065_ig	ARTHROv5_10064_ARTHROv5_10065_ig	---	0.235605	0.105548
ARTHROv5_10065	ARTHROv5_10065	conserved protein of unknown function	0.120752	0.315989
ARTHROv5_10065_ARTHROv5_10066_ig	ARTHROv5_10065_ARTHROv5_10066_ig	---	-0.340427	0.0319641
ARTHROv5_10066	ARTHROv5_10066	conserved hypothetical protein	-0.216437	0.157109
ARTHROv5_10067	ARTHROv5_10067	3-hydroxyisobutyrate dehydrogenase	-1.1951	0.00120018
ARTHROv5_10067_ARTHROv5_10068_ig	ARTHROv5_10067_ARTHROv5_10068_ig	---	-0.796025	0.00413937
ARTHROv5_10068	ARTHROv5_10068	conserved hypothetical protein (membrane)	-0.518996	0.010031
ARTHROv5_10069	ARTHROv5_10069	conserved hypothetical protein (secreted)	-0.445316	0.0406478
ARTHROv5_10070	ARTHROv5_10070	conserved membrane protein of unknown function	0.322696	0.17793
ARTHROv5_10071	lysA1	Diaminopimelate decarboxylase	-0.848129	0.0531565
ARTHROv5_10072	ARTHROv5_10072	conserved hypothetical protein	-0.33712	0.0519627
ARTHROv5_10072_ARTHROv5_10073_ig	ARTHROv5_10072_ARTHROv5_10073_ig	---	0.293297	0.132601
ARTHROv5_10073	msbA	Lipid A export ATP-binding/permease protein MsbA	-0.475178	0.0966429
ARTHROv5_10073_ARTHROv5_10074_ig	ARTHROv5_10073_ARTHROv5_10074_ig	---	0.147704	0.487216
ARTHROv5_10074	ARTHROv5_10074	conserved hypothetical protein	0.126458	0.502821
ARTHROv5_10074_ARTHROv5_10075_ig	ARTHROv5_10074_ARTHROv5_10075_ig	---	0.725298	0.0332814
ARTHROv5_10075	ARTHROv5_10075	conserved hypothetical protein	0.723741	0.00495035
ARTHROv5_10076	ARTHROv5_10076	conserved hypothetical protein	0.91294	0.000993257
ARTHROv5_10076_ARTHROv5_10077_ig	ARTHROv5_10076_ARTHROv5_10077_ig	---	1.85429	0.000432382
ARTHROv5_10077	ARTHROv5_10077	conserved hypothetical protein	2.81145	0.000798642
ARTHROv5_10078	ARTHROv5_10078	conserved hypothetical protein	-0.414431	0.122474
ARTHROv5_10078_ARTHROv5_10079_ig	ARTHROv5_10078_ARTHROv5_10079_ig	---	0.685346	0.0111543
ARTHROv5_10079	ARTHROv5_10079	conserved hypothetical protein (secreted)	0.786518	0.00435442
ARTHROv5_10079_ARTHROv5_10080_ig	ARTHROv5_10079_ARTHROv5_10080_ig	---	0.614184	0.295642
ARTHROv5_10080	stpA	Glucosylglycerol 3-phosphatase	-0.257851	0.0830459
ARTHROv5_10080_ARTHROv5_10081_ig	ARTHROv5_10080_ARTHROv5_10081_ig	---	0.0756619	0.851283
ARTHROv5_10081	mreB	cell wall structural complex MreBCD, actin-like component MreB	-0.143406	0.642156
ARTHROv5_10081_ARTHROv5_10082_ig	ARTHROv5_10081_ARTHROv5_10082_ig	---	-0.232714	0.131588
ARTHROv5_10082	ARTHROv5_10082	transposase	-0.114937	0.318001
ARTHROv5_10083	mreC	cell wall structural complex MreBCD, transmembrane component MreC	-1.36164	0.00203223
ARTHROv5_10084	mreD	cell wall structural complex MreBCD, transmembrane component MreD	-1.61263	0.000491574
ARTHROv5_10084_ARTHROv5_10085_ig	ARTHROv5_10084_ARTHROv5_10085_ig	---	-1.55369	0.00440778
ARTHROv5_10085	ARTHROv5_10085	transposase, IS605 family, OrfB (fragment)	0.342981	0.0399587
ARTHROv5_10086	ARTHROv5_10086	transposase	0.0679861	0.575477
ARTHROv5_10086_ARTHROv5_10087_ig	ARTHROv5_10086_ARTHROv5_10087_ig	---	1.08196	0.0829052
ARTHROv5_10087	ARTHROv5_10087	putative Arsenite-transporting ATPase	-0.00347842	0.984427
ARTHROv5_10088	ARTHROv5_10088	conserved exported protein of unknown function	-0.615603	0.00305728
ARTHROv5_10088_ARTHROv5_10089_ig	ARTHROv5_10088_ARTHROv5_10089_ig	---	-0.874318	0.00305728
ARTHROv5_10089	ARTHROv5_10089	conserved hypothetical protein	-0.754478	0.0191903
ARTHROv5_10089_ARTHROv5_10090_ig	ARTHROv5_10089_ARTHROv5_10090_ig	---	0.00590633	0.981351
ARTHROv5_10090	ARTHROv5_10090	conserved hypothetical protein	-1.15041	0.00159574
ARTHROv5_10090_ARTHROv5_10091_ig	ARTHROv5_10090_ARTHROv5_10091_ig	---	-0.556212	0.247194
ARTHROv5_10091	ARTHROv5_10091	cell division factor Ftn6	-0.683488	0.0368796
ARTHROv5_10092	ARTHROv5_10092	conserved hypothetical protein	0.265113	0.124336
ARTHROv5_10092_ARTHROv5_10093_ig	ARTHROv5_10092_ARTHROv5_10093_ig	---	0.101228	0.419252
ARTHROv5_10093	ARTHROv5_10093	conserved hypothetical protein	0.0187229	0.910991
ARTHROv5_10093_ARTHROv5_10094_ig	ARTHROv5_10093_ARTHROv5_10094_ig	---	-0.168437	0.155553
ARTHROv5_10094	ARTHROv5_10094	transposase, IS605 family, OrfB (fragment)	0.00470884	0.983985
ARTHROv5_10095	ARTHROv5_10095	transposase (fragment)family IS605	0.242558	0.0931868
ARTHROv5_10095_ARTHROv5_misc_RNA_66_ig	ARTHROv5_10095_ARTHROv5_misc_RNA_66_ig	---	0.0407841	0.820173
ARTHROv5_10096	ARTHROv5_10096	conserved protein of unknown function	-0.021702	0.936365
ARTHROv5_10097	ARTHROv5_10097	conserved hypothetical protein	-0.306262	0.0498825
ARTHROv5_10097_ARTHROv5_10098_ig	ARTHROv5_10097_ARTHROv5_10098_ig	---	-0.841093	0.00174817
ARTHROv5_10098	ARTHROv5_10098	putative Transcriptional regulator, AbrB/MazE/MraZ-like	0.552126	0.32582
ARTHROv5_10098_ARTHROv5_10099_ig	ARTHROv5_10098_ARTHROv5_10099_ig	---	0.279636	0.452245
ARTHROv5_10099	lpxD	UDP-3-O-(3-hydroxymyristoyl)-glucosamine N-acyltransferase	-0.35856	0.0580973
ARTHROv5_10099_ARTHROv5_10100_ig	ARTHROv5_10099_ARTHROv5_10100_ig	---	0.492211	0.182363
ARTHROv5_10100	ARTHROv5_10100	conserved hypothetical protein	0.722449	0.00827796
ARTHROv5_10101	ARTHROv5_10101	putative tRNA/rRNA methyltransferase, SpoU-like	1.16515	0.00601072
ARTHROv5_10101_ARTHROv5_10102_ig	ARTHROv5_10101_ARTHROv5_10102_ig	---	0.706849	0.0091783
ARTHROv5_10102	ARTHROv5_10102	conserved hypothetical protein	0.621501	0.00554272
ARTHROv5_10103	ARTHROv5_10103	hypothetical protein	0.358347	0.0466216
ARTHROv5_10103_ARTHROv5_10104_ig	ARTHROv5_10103_ARTHROv5_10104_ig	---	0.259798	0.128396
ARTHROv5_10104	ARTHROv5_10104	conserved protein of unknown function	0.313335	0.0659861
ARTHROv5_10105	ARTHROv5_10105	conserved protein of unknown function	-0.441708	0.14071
ARTHROv5_10106	ARTHROv5_10106	conserved hypothetical protein	-0.852035	0.00535107
ARTHROv5_10107	ARTHROv5_10107	conserved hypothetical protein	-0.247344	0.123037
ARTHROv5_10108	ARTHROv5_10108	putative bifunctional Serine/threonine protein kinase/ABC-type phosphate transport system, periplasmic component	0.513229	0.013674
ARTHROv5_10108_ARTHROv5_10109_ig	ARTHROv5_10108_ARTHROv5_10109_ig	---	0.173286	0.179471
ARTHROv5_10109	ARTHROv5_10109	conserved hypothetical protein	0.130547	0.301152
ARTHROv5_10110	ARTHROv5_10110	putative ATPase, AAA family	-0.647341	0.00798787
ARTHROv5_10111	ARTHROv5_10111	conserved hypothetical protein	-1.03108	0.00164431
ARTHROv5_10111_ARTHROv5_10112_ig	ARTHROv5_10111_ARTHROv5_10112_ig	---	0.318455	0.143924
ARTHROv5_10112	ARTHROv5_10112	putative phage tail sheath protein, Gp18-like	-0.0444171	0.717225
ARTHROv5_10113	ARTHROv5_10113	conserved hypothetical protein	-0.110746	0.424431
ARTHROv5_10113_ARTHROv5_10114_ig	ARTHROv5_10113_ARTHROv5_10114_ig	---	-0.50864	0.0445839
ARTHROv5_10114	ARTHROv5_10114	putative phage tail region protein	-0.615455	0.00677505
ARTHROv5_10115	ARTHROv5_10115	putative phage tail region protein	-0.702422	0.00383118
ARTHROv5_10116	ARTHROv5_10116	conserved hypothetical protein	-0.0703267	0.643328
ARTHROv5_10117	ARTHROv5_10117	conserved hypothetical protein	-0.428107	0.0130294
ARTHROv5_10118	ARTHROv5_10118	hypothetical protein	-0.256111	0.0849117
ARTHROv5_10119	ARTHROv5_10119	hypothetical protein	-0.300869	0.0906185
ARTHROv5_10120	ARTHROv5_10120	hypothetical protein	0.286358	0.381733
ARTHROv5_10120_ARTHROv5_10121_ig	ARTHROv5_10120_ARTHROv5_10121_ig	---	0.387135	0.476605
ARTHROv5_10121	ARTHROv5_10121	conserved protein of unknown function	-0.187862	0.175515
ARTHROv5_10121_ARTHROv5_10122_ig	ARTHROv5_10121_ARTHROv5_10122_ig	---	-0.282377	0.159654
ARTHROv5_10122	ARTHROv5_10122	conserved hypothetical protein	-0.541227	0.040778
ARTHROv5_10123	ARTHROv5_10123	1-acyl-sn-glycerol-3-phosphate acyltransferase	-0.361099	0.0350493
ARTHROv5_10123_ARTHROv5_10124_ig	ARTHROv5_10123_ARTHROv5_10124_ig	---	-0.235553	0.801125
ARTHROv5_10124	ARTHROv5_10124	putative oxidoreductase, DSBA-like (fragment)	1.05143	0.0229966
ARTHROv5_10124_ARTHROv5_10125_ig	ARTHROv5_10124_ARTHROv5_10125_ig	---	1.00974	0.00428311
ARTHROv5_10125	ARTHROv5_10125	ABC transporter ATP-binding protein	-0.0586831	0.797152
ARTHROv5_10125_ARTHROv5_10126_ig	ARTHROv5_10125_ARTHROv5_10126_ig	---	0.0529304	0.883071
ARTHROv5_10126	ARTHROv5_10126	hypothetical protein	0.746185	0.0376375
ARTHROv5_10127	ARTHROv5_10127	putative secretion protein, HlyD-like	-0.238889	0.350798
ARTHROv5_10127_ARTHROv5_10128_ig	ARTHROv5_10127_ARTHROv5_10128_ig	---	0.431273	0.0681788
ARTHROv5_10128	ARTHROv5_10128	putative chromosome partitioning protein, ParB-like	0.26288	0.540265
ARTHROv5_10128_ARTHROv5_10129_ig	ARTHROv5_10128_ARTHROv5_10129_ig	---	0.343102	0.506321
ARTHROv5_10129	ARTHROv5_10129	hypothetical protein	0.214599	0.237667
ARTHROv5_10130	ARTHROv5_10130	conserved hypothetical protein	0.341179	0.0506621
ARTHROv5_10131	ARTHROv5_10131	putative oxidoreductase, DSBA-like	1.2424	0.00223189
ARTHROv5_10132	argS	Arginyl-tRNA synthetase	0.0773792	0.859649
ARTHROv5_10132_ARTHROv5_10133_ig	ARTHROv5_10132_ARTHROv5_10133_ig	---	0.707497	0.148061
ARTHROv5_10133	ARTHROv5_10133	conserved hypothetical protein	0.601205	0.0100013
ARTHROv5_10134	ARTHROv5_10134	conserved protein of unknown function	0.202113	0.354178
ARTHROv5_10135	ARTHROv5_10135	conserved hypothetical protein	0.340605	0.257358
ARTHROv5_10135_ARTHROv5_10136_ig	ARTHROv5_10135_ARTHROv5_10136_ig	---	0.00273017	0.99412
ARTHROv5_10136	mutS	DNA mismatch repair protein MutS	1.5754	0.00148071
ARTHROv5_10136_ARTHROv5_10137_ig	ARTHROv5_10136_ARTHROv5_10137_ig	---	-0.850776	0.234091
ARTHROv5_10137	ARTHROv5_10137	conserved protein of unknown function	-1.13293	0.134852
ARTHROv5_10137_ARTHROv5_10138_ig	ARTHROv5_10137_ARTHROv5_10138_ig	---	-0.581173	0.444735
ARTHROv5_10138	ARTHROv5_10138	conserved hypothetical protein	-0.329833	0.183572
ARTHROv5_10138_ARTHROv5_10139_ig	ARTHROv5_10138_ARTHROv5_10139_ig	---	-0.650633	0.00616406
ARTHROv5_10139	hemG	Protoporphyrinogen oxidase	-0.439986	0.0311574
ARTHROv5_10139_ARTHROv5_10140_ig	ARTHROv5_10139_ARTHROv5_10140_ig	---	-0.170549	0.588081
ARTHROv5_10140	ARTHROv5_10140	two-component response regulator, CheY-like receiver	0.655168	0.153083
ARTHROv5_10141	ARTHROv5_10141	conserved hypothetical protein	-0.0337335	0.81815
ARTHROv5_10142	ARTHROv5_10142	conserved hypothetical protein	0.0456975	0.703835
ARTHROv5_10142_ARTHROv5_10143_ig	ARTHROv5_10142_ARTHROv5_10143_ig	---	0.186826	0.165384
ARTHROv5_10143	thiG	Thiazole biosynthesis protein ThiG	1.41392	0.00544819
ARTHROv5_10143_ARTHROv5_10144_ig	ARTHROv5_10143_ARTHROv5_10144_ig	---	0.309115	0.797726
ARTHROv5_10144	metK	S-adenosylmethionine synthetase	-0.137765	0.521761
ARTHROv5_10144_ARTHROv5_10145_ig	ARTHROv5_10144_ARTHROv5_10145_ig	---	0.102322	0.852367
ARTHROv5_10145	ARTHROv5_10145	conserved protein of unknown function	-0.555682	0.197589
ARTHROv5_10146	ARTHROv5_10146	transposase	0.398082	0.0183227
ARTHROv5_10147	ARTHROv5_10147	conserved protein of unknown function	-0.528327	0.0144372
ARTHROv5_10147_ARTHROv5_10148_ig	ARTHROv5_10147_ARTHROv5_10148_ig	---	-0.555743	0.00802349
ARTHROv5_10148	rpsA1	30S ribosomal protein S1	0.0405283	0.796676
ARTHROv5_10148_ARTHROv5_10149_ig	ARTHROv5_10148_ARTHROv5_10149_ig	---	-0.0441439	0.71803
ARTHROv5_10149	ARTHROv5_10149	transposase, IS605 family (fragment)	0.0925029	0.449099
ARTHROv5_10150	ARTHROv5_10150	transposase, IS605 family (fragment)	0.0726342	0.561362
ARTHROv5_10150_ARTHROv5_misc_RNA_68_ig	ARTHROv5_10150_ARTHROv5_misc_RNA_68_ig	---	0.123558	0.35109
ARTHROv5_10151	ARTHROv5_10151	conserved protein of unknown function	0.249743	0.102123
ARTHROv5_10152	ARTHROv5_10152	transposase, IS605 family, OrfB (fragment)	-0.0192418	0.88452
ARTHROv5_10153	dps	DNA protection during starvation protein	0.139777	0.21982
ARTHROv5_10153_ARTHROv5_10154_ig	ARTHROv5_10153_ARTHROv5_10154_ig	---	-0.0150142	0.912255
ARTHROv5_10154	ARTHROv5_10154	conserved protein of unknown function	0.958823	0.00866772
ARTHROv5_10154_ARTHROv5_10155_ig	ARTHROv5_10154_ARTHROv5_10155_ig	---	0.566463	0.00666005
ARTHROv5_10155	ARTHROv5_10155	conserved protein of unknown function	0.301174	0.0342137
ARTHROv5_10155_ARTHROv5_10156_ig	ARTHROv5_10155_ARTHROv5_10156_ig	---	0.101166	0.375714
ARTHROv5_10156	ARTHROv5_10156	transposase (fragment)	0.0786213	0.513247
ARTHROv5_10156_ARTHROv5_10157_ig	ARTHROv5_10156_ARTHROv5_10157_ig	---	0.395774	0.10516
ARTHROv5_10157	ARTHROv5_10157	anti-sigma factor antagonist	0.173108	0.460916
ARTHROv5_10157_ARTHROv5_10158_ig	ARTHROv5_10157_ARTHROv5_10158_ig	---	0.628511	0.00955428
ARTHROv5_10158	ARTHROv5_10158	two-component response regulator, CheY-like receiver	-0.842547	0.013233
ARTHROv5_10159	ARTHROv5_10159	putative Anti-sigma regulatory factor (Ser/Thr protein kinase)	0.169464	0.527586
ARTHROv5_10160	ARTHROv5_10160	conserved hypothetical protein	0.126935	0.479855
ARTHROv5_10160_ARTHROv5_10161_ig	ARTHROv5_10160_ARTHROv5_10161_ig	---	-0.122979	0.827485
ARTHROv5_10161	polA	DNA polymerase I	-0.501627	0.0856262
ARTHROv5_10162	ARTHROv5_10162	conserved protein of unknown function	-0.619567	0.0472964
ARTHROv5_10164	ARTHROv5_10164	conserved protein of unknown function	-0.0960052	0.397092
ARTHROv5_10164_ARTHROv5_10165_ig	ARTHROv5_10164_ARTHROv5_10165_ig	---	0.414982	0.23239
ARTHROv5_10165	intA3	site-specific recombinase	0.336909	0.0426725
ARTHROv5_10165_ARTHROv5_10166_ig	ARTHROv5_10165_ARTHROv5_10166_ig	---	-0.0367329	0.820233
ARTHROv5_10166	ARTHROv5_10166	conserved protein of unknown function	0.454639	0.0190658
ARTHROv5_10167	faxA8	unknown phage of the genus Arthrospira, protein A	0.0165459	0.960045
ARTHROv5_10168	faxB1	unknown phage of the genus Arthrospira, protein B	-0.644915	0.163445
ARTHROv5_10169	ARTHROv5_10169	conserved protein of unknown function	-0.267349	0.603374
ARTHROv5_10170	ARTHROv5_10170	conserved protein of unknown function	-0.378174	0.506212
ARTHROv5_10171	faxE8	unknown phage of the genus Arthrospira, protein E	-0.476605	0.533936
ARTHROv5_10172	ARTHROv5_10172	conserved protein of unknown function	-0.247129	0.676722
ARTHROv5_10173	ARTHROv5_10173	conserved protein of unknown function	-0.311373	0.731391
ARTHROv5_10175	ARTHROv5_10175	conserved protein of unknown function	-0.459098	0.0299934
ARTHROv5_10176	ARTHROv5_10176	protein of unknown function	-0.837464	0.0190658
ARTHROv5_10177	faxJ4	unknown phage of the genus Arthrospira, protein J	-0.535668	0.0722469
ARTHROv5_10177_ARTHROv5_10178_ig	ARTHROv5_10177_ARTHROv5_10178_ig	---	-0.768765	0.423322
ARTHROv5_10178	ARTHROv5_10178	conserved protein of unknown function	-0.825024	0.418066
ARTHROv5_10178_ARTHROv5_10179_ig	ARTHROv5_10178_ARTHROv5_10179_ig	---	0.35771	0.244634
ARTHROv5_10179	ARTHROv5_10179	conserved protein of unknown function	-0.885341	0.10249
ARTHROv5_10180	ARTHROv5_10180	conserved protein of unknown function	-0.897787	0.022311
ARTHROv5_10181	ARTHROv5_10181	protein of unknown function	0.217868	0.627358
ARTHROv5_10181_ARTHROv5_10182_ig	ARTHROv5_10181_ARTHROv5_10182_ig	---	0.0208513	0.950858
ARTHROv5_10182	ARTHROv5_10182	conserved protein of unknown function	-1.01306	0.0483204
ARTHROv5_10184	ARTHROv5_10184	conserved protein of unknown function	-0.360227	0.176744
ARTHROv5_10184_ARTHROv5_10185_ig	ARTHROv5_10184_ARTHROv5_10185_ig	---	-1.21043	0.105856
ARTHROv5_10185	ARTHROv5_10185	conserved protein of unknown function	-0.991328	0.148052
ARTHROv5_10186	ARTHROv5_10186	conserved protein of unknown function	-0.138317	0.711903
ARTHROv5_10187	ARTHROv5_10187	conserved protein of unknown function	-0.927858	0.0269744
ARTHROv5_10187_ARTHROv5_10188_ig	ARTHROv5_10187_ARTHROv5_10188_ig	---	-0.169588	0.600734
ARTHROv5_10188	ARTHROv5_10188	hypothetical protein	0.264018	0.128506
ARTHROv5_10188_ARTHROv5_10189_ig	ARTHROv5_10188_ARTHROv5_10189_ig	---	-0.208112	0.558353
ARTHROv5_10189	ARTHROv5_10189	putative Acyl-CoA dehydrogenase (fragment)	-0.199721	0.221293
ARTHROv5_10190	ARTHROv5_10190	conserved protein of unknown function	-0.355544	0.0199008
ARTHROv5_10191	ARTHROv5_10191	putative resolvase R80	-0.226605	0.174174
ARTHROv5_10191_ARTHROv5_10192_ig	ARTHROv5_10191_ARTHROv5_10192_ig	---	-0.458233	0.0254618
ARTHROv5_10192	ARTHROv5_10192	putative resolvase, IS607 family (fragment)	0.299354	0.0781796
ARTHROv5_10193	ARTHROv5_10193	transposase, IS605 family, OrfB (fragment)	0.162673	0.214813
ARTHROv5_10193_ARTHROv5_10194_ig	ARTHROv5_10193_ARTHROv5_10194_ig	---	0.360044	0.159463
ARTHROv5_10194	ARTHROv5_10194	conserved hypothetical protein (membrane)	0.6457	0.0248009
ARTHROv5_10194_ARTHROv5_10195_ig	ARTHROv5_10194_ARTHROv5_10195_ig	---	-1.22389	0.181367
ARTHROv5_10195	ARTHROv5_10195	conserved hypothetical protein	-2.84539	0.000139009
ARTHROv5_10195_ARTHROv5_10196_ig	ARTHROv5_10195_ARTHROv5_10196_ig	---	-1.06038	0.00253987
ARTHROv5_10196	purA	adenylosuccinate synthetase, IMP--aspartate ligase, succinoadenylic kinosynthetase	-0.881929	0.000865939
ARTHROv5_10196_ARTHROv5_10197_ig	ARTHROv5_10196_ARTHROv5_10197_ig	---	-1.43298	0.000303868
ARTHROv5_10197	rplY	50S ribosomal protein L25 (General stress protein CTC)	-0.82648	0.00220429
ARTHROv5_10197_ARTHROv5_10198_ig	ARTHROv5_10197_ARTHROv5_10198_ig	---	-0.186418	0.227661
ARTHROv5_10198	ARTHROv5_10198	putative pfkB family carbohydrate kinase; Adenosine kinase	-0.232914	0.0785264
ARTHROv5_10198_ARTHROv5_10199_ig	ARTHROv5_10198_ARTHROv5_10199_ig	---	-0.627046	0.0222774
ARTHROv5_10199	ARTHROv5_10199	conserved hypothetical protein	-0.0198629	0.933651
ARTHROv5_10199_ARTHROv5_10200_ig	ARTHROv5_10199_ARTHROv5_10200_ig	---	0.0711926	0.889294
ARTHROv5_10200	ARTHROv5_10200	conserved hypothetical protein	-0.260576	0.0926477
ARTHROv5_10200_ARTHROv5_10201_ig	ARTHROv5_10200_ARTHROv5_10201_ig	---	-0.0212366	0.893848
ARTHROv5_10201	ARTHROv5_10201	conserved hypothetical protein	0.0173936	0.912255
ARTHROv5_10201_ARTHROv5_10202_ig	ARTHROv5_10201_ARTHROv5_10202_ig	---	-1.01508	0.0790358
ARTHROv5_10202	ARTHROv5_10202	putative Beta-carotene ketolase	-1.04439	0.00189178
ARTHROv5_10203	lepB2	signal peptidase I	-1.24067	0.000491574
ARTHROv5_10204	ARTHROv5_10204	conserved protein of unknown function	-1.41394	0.00226707
ARTHROv5_10205	ARTHROv5_10205	conserved hypothetical protein	-0.00842574	0.94929
ARTHROv5_10205_ARTHROv5_10206_ig	ARTHROv5_10205_ARTHROv5_10206_ig	---	1.21526	0.00124858
ARTHROv5_10206	lepA	GTP-binding membrane protein	0.943742	0.00064539
ARTHROv5_10207	algI	Membrane bound O-acyl transferase, MBOAT	-0.151963	0.360049
ARTHROv5_10207_ARTHROv5_10208_ig	ARTHROv5_10207_ARTHROv5_10208_ig	---	0.268181	0.535751
ARTHROv5_10208	ARTHROv5_10208	conserved hypothetical protein	-0.147365	0.424607
ARTHROv5_10208_ARTHROv5_10209_ig	ARTHROv5_10208_ARTHROv5_10209_ig	---	-0.246225	0.32553
ARTHROv5_10209	ARTHROv5_10209	conserved hypothetical protein (secreted)	0.787285	0.00232267
ARTHROv5_10209_ARTHROv5_10210_ig	ARTHROv5_10209_ARTHROv5_10210_ig	---	1.97534	0.000892653
ARTHROv5_10210	ARTHROv5_10210	putative two-component sensor histidine kinase	0.711249	0.0128195
ARTHROv5_10210_ARTHROv5_10211_ig	ARTHROv5_10210_ARTHROv5_10211_ig	---	1.33262	0.192836
ARTHROv5_10211	ARTHROv5_10211	Protein kinase of the HstK subfamily (with both a ser/thr kinase domain and a His kinase domain)	1.83068	0.000219036
ARTHROv5_10211_ARTHROv5_10212_ig	ARTHROv5_10211_ARTHROv5_10212_ig	---	1.23696	0.0547271
ARTHROv5_10212	ARTHROv5_10212	conserved hypothetical protein	0.0109502	0.968257
ARTHROv5_10212_ARTHROv5_10213_ig	ARTHROv5_10212_ARTHROv5_10213_ig	---	0.0650921	0.833903
ARTHROv5_10213	ARTHROv5_10213	conserved hypothetical protein (secreted)	-0.103764	0.630693
ARTHROv5_10213_ARTHROv5_10214_ig	ARTHROv5_10213_ARTHROv5_10214_ig	---	0.0957578	0.863698
ARTHROv5_10214	ARTHROv5_10214	conserved hypothetical protein	0.210959	0.218803
ARTHROv5_10214_ARTHROv5_10215_ig	ARTHROv5_10214_ARTHROv5_10215_ig	---	-0.0340395	0.865611
ARTHROv5_10215	ARTHROv5_10215	AAA ATPase, central region	-1.01413	0.00164431
ARTHROv5_10216	ARTHROv5_10216	conserved protein of unknown function	-0.852473	0.0429889
ARTHROv5_10216_ARTHROv5_10217_ig	ARTHROv5_10216_ARTHROv5_10217_ig	---	0.43888	0.507586
ARTHROv5_10217	ARTHROv5_10217	conserved hypothetical protein	0.234625	0.219922
ARTHROv5_10217_ARTHROv5_10218_ig	ARTHROv5_10217_ARTHROv5_10218_ig	---	0.863448	0.185622
ARTHROv5_10218	ARTHROv5_10218	conserved hypothetical protein (membrane)	0.449875	0.0111374
ARTHROv5_10219	pmbA	Peptidase U62, modulator of DNA gyrase	0.237002	0.132728
ARTHROv5_10219_ARTHROv5_10220_ig	ARTHROv5_10219_ARTHROv5_10220_ig	---	0.793404	0.0190651
ARTHROv5_10220	ARTHROv5_10220	conserved protein of unknown function	1.17135	0.00164868
ARTHROv5_10220_ARTHROv5_10221_ig	ARTHROv5_10220_ARTHROv5_10221_ig	---	0.534088	0.0645171
ARTHROv5_10221	clpS1	ATP-dependent Clp protease adapter protein ClpS	0.552902	0.00618831
ARTHROv5_10222	ARTHROv5_10222	conserved hypothetical protein (membrane)	0.369872	0.0993578
ARTHROv5_10223	ARTHROv5_10223	putative Ferredoxin, 2Fe-2S	-0.32126	0.251679
ARTHROv5_10224	ARTHROv5_10224	conserved hypothetical protein	-0.612566	0.00548598
ARTHROv5_10224_ARTHROv5_10225_ig	ARTHROv5_10224_ARTHROv5_10225_ig	---	0.0442411	0.862737
ARTHROv5_10225	ARTHROv5_10225	Multi-sensor hybrid histidine kinase	-0.0423999	0.823236
ARTHROv5_10225_ARTHROv5_10226_ig	ARTHROv5_10225_ARTHROv5_10226_ig	---	0.114702	0.56664
ARTHROv5_10226	glcF	Glycolate oxidase iron-sulfur subunit	0.83448	0.00299188
ARTHROv5_10227	glcE	Glycolate oxidase, FAD binding subunit	0.072413	0.580122
ARTHROv5_10227_ARTHROv5_10228_ig	ARTHROv5_10227_ARTHROv5_10228_ig	---	-0.625132	0.242359
ARTHROv5_10228	ARTHROv5_10228	Diguanylate cyclase/phosphodiesterase with PAS/PAC sensor(S)	-2.19566	0.000120999
ARTHROv5_10228_ARTHROv5_10229_ig	ARTHROv5_10228_ARTHROv5_10229_ig	---	-1.32119	0.00203066
ARTHROv5_10229	ARTHROv5_10229	conserved hypothetical protein (fragment part 1)	-0.240024	0.245092
ARTHROv5_10229_ARTHROv5_10230_ig	ARTHROv5_10229_ARTHROv5_10230_ig	---	0.329164	0.0314719
ARTHROv5_10230	ARTHROv5_10230	conserved hypothetical protein (fragment part 2)	0.310053	0.0837676
ARTHROv5_10231	glmS	Glutamine--fructose-6-phosphate transaminase (isomerizing)	0.79218	0.00481502
ARTHROv5_10231_ARTHROv5_10232_ig	ARTHROv5_10231_ARTHROv5_10232_ig	---	-0.371541	0.0802741
ARTHROv5_10232	ARTHROv5_10232	hypothetical protein	-0.294798	0.286422
ARTHROv5_10232_ARTHROv5_10233_ig	ARTHROv5_10232_ARTHROv5_10233_ig	---	-0.449835	0.104842
ARTHROv5_10233	ARTHROv5_10233	conserved protein of unknown function	-0.292093	0.159429
ARTHROv5_10233_ARTHROv5_10234_ig	ARTHROv5_10233_ARTHROv5_10234_ig	---	-0.371543	0.272027
ARTHROv5_10234	ARTHROv5_10234	conserved hypothetical protein	0.309169	0.343312
ARTHROv5_10234_ARTHROv5_10235_ig	ARTHROv5_10234_ARTHROv5_10235_ig	---	0.0994434	0.561671
ARTHROv5_10235	psaC	Photosystem I iron-sulfur center (Photosystem I subunit VII) (9 kDa polypeptide) (PSI-C) (PsaC)	0.422128	0.0993578
ARTHROv5_10236	ARTHROv5_10236	hypothetical protein	0.0248316	0.921265
ARTHROv5_10237	ARTHROv5_10237	putative CoB--CoM heterodisulfide reductase subunit B, HdrB-like	-0.0569967	0.710379
ARTHROv5_10238	ARTHROv5_10238	protein of unknown function	0.541985	0.0481501
ARTHROv5_10238_ARTHROv5_10239_ig	ARTHROv5_10238_ARTHROv5_10239_ig	---	0.32888	0.323319
ARTHROv5_10239	acpP	acyl carrier protein	-1.03326	0.000900386
ARTHROv5_10240	fabF1	3-oxoacyl-[acyl-carrier-protein] synthase 2	-0.780129	0.00201352
ARTHROv5_10240_ARTHROv5_10241_ig	ARTHROv5_10240_ARTHROv5_10241_ig	---	0.379092	0.284613
ARTHROv5_10241	murI	Glutamate racemase	0.295915	0.0681824
ARTHROv5_10242	ARTHROv5_10242	hypothetical protein	-0.289011	0.297858
ARTHROv5_10243_ARTHROv5_10244_ig	ARTHROv5_10243_ARTHROv5_10244_ig	---	0.00158295	0.996796
ARTHROv5_10244	nrdR	transcriptional repressor of nrd genes	-0.59199	0.00481758
ARTHROv5_10244_ARTHROv5_10245_ig	ARTHROv5_10244_ARTHROv5_10245_ig	---	-0.980657	0.000554591
ARTHROv5_10245	psbB	Photosystem II P680 chlorophyll A apoprotein (CP-47 protein)	-0.326242	0.100037
ARTHROv5_10245_ARTHROv5_10246_ig	ARTHROv5_10245_ARTHROv5_10246_ig	---	-1.1858	0.000555596
ARTHROv5_10246	ARTHROv5_10246	conserved hypothetical protein	-0.848288	0.00272203
ARTHROv5_10246_ARTHROv5_10247_ig	ARTHROv5_10246_ARTHROv5_10247_ig	---	0.424204	0.0248623
ARTHROv5_10247	ARTHROv5_10247	Glycosyl transferase, group 1	0.0502191	0.736221
ARTHROv5_10247_ARTHROv5_10248_ig	ARTHROv5_10247_ARTHROv5_10248_ig	---	-0.4642	0.162906
ARTHROv5_10248	ARTHROv5_10248	conserved hypothetical protein (membrane)	-0.499897	0.0312461
ARTHROv5_10249	ARTHROv5_10249	putative two-component sensor histidine kinase (fragment)	-0.642392	0.00390293
ARTHROv5_10250	ARTHROv5_10250	putative two-component response regulator, CheY-like	0.220762	0.513171
ARTHROv5_10251	ARTHROv5_10251	putative bifunctional two-component response regulator, CheY-like/Guanylate cyclase	0.984404	0.0190658
ARTHROv5_10252	ARTHROv5_10252	conserved hypothetical protein	0.782818	0.00257789
ARTHROv5_10253	nspVM	Modification methylase NspV	0.124582	0.360729
ARTHROv5_10254	asp8005ORF2921	Type-2 restriction enzyme Asp8005ORF2921 (Type II restriction enzyme ) (Endonuclease prototype AsuII)	0.12815	0.53903
ARTHROv5_10255	ARTHROv5_10255	conserved hypothetical protein	0.370012	0.0626971
ARTHROv5_10255_ARTHROv5_10256_ig	ARTHROv5_10255_ARTHROv5_10256_ig	---	0.14764	0.42429
ARTHROv5_10256	ARTHROv5_10256	conserved hypothetical protein (membrane)	-0.481984	0.0966428
ARTHROv5_10257	ARTHROv5_10257	putative UDP-glucose 4-epimerase	0.155317	0.498926
ARTHROv5_10257_ARTHROv5_10258_ig	ARTHROv5_10257_ARTHROv5_10258_ig	---	-0.2887	0.583327
ARTHROv5_10258	ARTHROv5_10258	conserved hypothetical protein	0.00747525	0.967963
ARTHROv5_10259	ARTHROv5_10259	conserved hypothetical protein	0.0364802	0.868981
ARTHROv5_10260	ARTHROv5_10260	hypothetical protein	-0.47753	0.338766
ARTHROv5_10261	ARTHROv5_10261	putative dTDP-D-glucose 4,6-dehydratase	-0.788397	0.0187188
ARTHROv5_10262	ARTHROv5_10262	hypothetical protein (membrane)	-0.262792	0.446464
ARTHROv5_10263	ARTHROv5_10263	putative Choline dehydrogenase, BetA-like	0.498922	0.0667396
ARTHROv5_10264	ARTHROv5_10264	conserved hypothetical protein	0.297189	0.506882
ARTHROv5_10264_ARTHROv5_10265_ig	ARTHROv5_10264_ARTHROv5_10265_ig	---	0.244026	0.0763008
ARTHROv5_10265	trmU	tRNA (5-methylaminomethyl-2-thiouridylate)-methyltransferase	0.347781	0.0254711
ARTHROv5_10265_ARTHROv5_10266_ig	ARTHROv5_10265_ARTHROv5_10266_ig	---	0.593018	0.00475485
ARTHROv5_10266	ARTHROv5_10266	central regulator of carbon metabolism (tentative)	0.77442	0.00298151
ARTHROv5_10266_ARTHROv5_10267_ig	ARTHROv5_10266_ARTHROv5_10267_ig	---	1.45147	0.000995143
ARTHROv5_10267	pntB	pyridine nucleotide transhydrogenase, beta subunit	1.64209	0.000303868
ARTHROv5_10268	pntAB	pyridine nucleotide transhydrogenase, alpha subunit, hydrophobic domain	2.03801	6.777e-05
ARTHROv5_10268_ARTHROv5_10269_ig	ARTHROv5_10268_ARTHROv5_10269_ig	---	2.24511	6.86605e-05
ARTHROv5_10269	pntAA	pyridine nucleotide transhydrogenase, alpha subunit, soluble domain	1.70317	0.000139009
ARTHROv5_10269_ARTHROv5_10270_ig	ARTHROv5_10269_ARTHROv5_10270_ig	---	1.83617	0.000180041
ARTHROv5_10270	ARTHROv5_10270	conserved hypothetical protein (secreted)	-0.00156308	0.992069
ARTHROv5_10270_ARTHROv5_10271_ig	ARTHROv5_10270_ARTHROv5_10271_ig	---	-0.0581371	0.673
ARTHROv5_10272	ARTHROv5_10272	transposase, IS605 family, OrfB (fragment)	0.0941414	0.687086
ARTHROv5_10272_ARTHROv5_10273_ig	ARTHROv5_10272_ARTHROv5_10273_ig	---	0.314636	0.0839258
ARTHROv5_10273	rnpA	protein C5 component of RNase P	-0.130228	0.254988
ARTHROv5_10274	ARTHROv5_10274	conserved hypothetical protein	-0.00618639	0.963482
ARTHROv5_10274_ARTHROv5_10275_ig	ARTHROv5_10274_ARTHROv5_10275_ig	---	-1.05636	0.00600658
ARTHROv5_10275	ARTHROv5_10275	putative inner membrane insertion protein, OxaA/YidC-like	-0.124295	0.284056
ARTHROv5_10276	ARTHROv5_10276	conserved hypothetical protein	0.0573406	0.673691
ARTHROv5_10277	ARTHROv5_10277	conserved hypothetical protein	0.544305	0.0102171
ARTHROv5_10278	ARTHROv5_10278	putative ATPase, AAA family	0.307763	0.197964
ARTHROv5_10278_ARTHROv5_10279_ig	ARTHROv5_10278_ARTHROv5_10279_ig	---	-1.13124	0.00744377
ARTHROv5_10279	ARTHROv5_10279	conserved hypothetical protein (secreted)	-0.0423309	0.756342
ARTHROv5_10279_ARTHROv5_10280_ig	ARTHROv5_10279_ARTHROv5_10280_ig	---	0.423119	0.162701
ARTHROv5_10280	ARTHROv5_10280	conserved protein of unknown function	-0.116938	0.413047
ARTHROv5_10281	galT	Galactose-1-phosphate uridylyltransferase	-1.06018	0.0113454
ARTHROv5_10282	hpd	4-hydroxyphenylpyruvate dioxygenase	0.142594	0.487134
ARTHROv5_10283	ARTHROv5_10283	conserved hypothetical protein	-0.164849	0.396721
ARTHROv5_10283_ARTHROv5_10284_ig	ARTHROv5_10283_ARTHROv5_10284_ig	---	0.254244	0.218838
ARTHROv5_10284	ARTHROv5_10284	conserved protein of unknown function	-0.0118483	0.94805
ARTHROv5_10284_ARTHROv5_10285_ig	ARTHROv5_10284_ARTHROv5_10285_ig	---	0.574477	0.0324545
ARTHROv5_10285	ARTHROv5_10285	conserved hypothetical protein	-0.299264	0.139331
ARTHROv5_10285_ARTHROv5_10286_ig	ARTHROv5_10285_ARTHROv5_10286_ig	---	0.323806	0.350188
ARTHROv5_10286	ARTHROv5_10286	conserved protein of unknown function	0.353699	0.13749
ARTHROv5_10286_ARTHROv5_10287_ig	ARTHROv5_10286_ARTHROv5_10287_ig	---	-0.268497	0.590334
ARTHROv5_10287	ARTHROv5_10287	putative Na+/H+ antiporter	0.0234964	0.936074
ARTHROv5_10288	ARTHROv5_10288	conserved hypothetical protein	0.502305	0.229422
ARTHROv5_10289	ARTHROv5_10289	putative Serine-type D-Ala-D-Ala carboxypeptidase	0.21431	0.32007
ARTHROv5_10290	ARTHROv5_10290	conserved hypothetical protein	0.161827	0.228421
ARTHROv5_10290_ARTHROv5_10291_ig	ARTHROv5_10290_ARTHROv5_10291_ig	---	0.295081	0.0329875
ARTHROv5_10291	ARTHROv5_10291	conserved protein of unknown function	0.0504483	0.823068
ARTHROv5_10291_ARTHROv5_10292_ig	ARTHROv5_10291_ARTHROv5_10292_ig	---	-0.180035	0.2039
ARTHROv5_10292	ARTHROv5_10292	conserved hypothetical protein	0.301534	0.0802741
ARTHROv5_10292_ARTHROv5_10293_ig	ARTHROv5_10292_ARTHROv5_10293_ig	---	-0.022594	0.893848
ARTHROv5_10293	ppc	Phosphoenolpyruvate carboxylase	1.47329	0.00119517
ARTHROv5_10293_ARTHROv5_10294_ig	ARTHROv5_10293_ARTHROv5_10294_ig	---	2.06804	0.000272588
ARTHROv5_10294	ARTHROv5_10294	hypothetical protein	0.412252	0.0856262
ARTHROv5_10295	ARTHROv5_10295	conserved hypothetical protein	0.733325	0.01945
ARTHROv5_10296	ARTHROv5_10296	putative transcriptional regulator	1.28057	0.0230909
ARTHROv5_10297	cpsB	Mannose-1-phosphate guanylyltransferase	0.00395551	0.990717
ARTHROv5_10297_ARTHROv5_10298_ig	ARTHROv5_10297_ARTHROv5_10298_ig	---	0.134976	0.429994
ARTHROv5_10298	ARTHROv5_10298	putative Aldo/keto reductase	-0.347066	0.0682887
ARTHROv5_10298_ARTHROv5_10299_ig	ARTHROv5_10298_ARTHROv5_10299_ig	---	-1.73286	0.00510714
ARTHROv5_10299	ARTHROv5_10299	conserved hypothetical protein	-1.40876	0.00223189
ARTHROv5_10300	ARTHROv5_10300	conserved protein of unknown function	0.00214003	0.98951
ARTHROv5_10301	ARTHROv5_10301	Clostridial hydrophobic	0.0369337	0.799612
ARTHROv5_10302	cobS	Cobalamin synthase	0.527154	0.0262939
ARTHROv5_10302_ARTHROv5_10303_ig	ARTHROv5_10302_ARTHROv5_10303_ig	---	0.122859	0.654221
ARTHROv5_10303	ARTHROv5_10303	protein of unknown function	0.457702	0.0680009
ARTHROv5_10303_ARTHROv5_10304_ig	ARTHROv5_10303_ARTHROv5_10304_ig	---	0.251313	0.0883917
ARTHROv5_10304	ARTHROv5_10304	conserved hypothetical protein	0.163249	0.195835
ARTHROv5_10305	tgt	tRNA-guanine transglycosylase (queuine/archaeosine tRNA-ribosyltransferase)	0.175363	0.311842
ARTHROv5_10305_ARTHROv5_10306_ig	ARTHROv5_10305_ARTHROv5_10306_ig	---	-0.705853	0.00199372
ARTHROv5_10306	ARTHROv5_10306	conserved hypothetical protein (fragment)	-0.448446	0.165339
ARTHROv5_10306_ARTHROv5_10307_ig	ARTHROv5_10306_ARTHROv5_10307_ig	---	-0.0303701	0.835857
ARTHROv5_10307	ARTHROv5_10307	HNH endonuclease	-0.232106	0.0725208
ARTHROv5_10307_ARTHROv5_10308_ig	ARTHROv5_10307_ARTHROv5_10308_ig	---	0.00186278	0.989592
ARTHROv5_10308	ARTHROv5_10308	conserved hypothetical protein	-0.384925	0.0228812
ARTHROv5_10309	cysK3	Cysteine synthase	0.963009	0.000861823
ARTHROv5_10309_ARTHROv5_10310_ig	ARTHROv5_10309_ARTHROv5_10310_ig	---	0.435212	0.446464
ARTHROv5_10310	rnc	Ribonuclease 3 2	-0.820986	0.0433104
ARTHROv5_10312	psbA2	Photosystem Q(B) protein 1 precursor (32 kDa thylakoid membrane protein 1) (Photosystem II protein D1 1)	0.065209	0.565108
ARTHROv5_10313	ARTHROv5_10313	conserved protein of unknown function	1.02564	0.000848439
ARTHROv5_10313_ARTHROv5_10314_ig	ARTHROv5_10313_ARTHROv5_10314_ig	---	1.2841	0.000885806
ARTHROv5_10314	ARTHROv5_10314	conserved protein of unknown function	0.647451	0.0152252
ARTHROv5_10315	ARTHROv5_10315	conserved protein of unknown function	0.17436	0.312092
ARTHROv5_10315_ARTHROv5_10316_ig	ARTHROv5_10315_ARTHROv5_10316_ig	---	0.293314	0.30285
ARTHROv5_10316	ARTHROv5_10316	conserved protein of unknown function	0.207009	0.474303
ARTHROv5_10317	ARTHROv5_10317	conserved protein of unknown function	-0.204478	0.254728
ARTHROv5_10318	ARTHROv5_10318	protein of unknown function	-0.100123	0.654166
ARTHROv5_10319	psbA2	Photosystem Q(B) protein 1 precursor (32 kDa thylakoid membrane protein 1) (Photosystem II protein D1 1)	0.0277572	0.82202
ARTHROv5_10319_ARTHROv5_10320_ig	ARTHROv5_10319_ARTHROv5_10320_ig	---	0.274326	0.14568
ARTHROv5_10320	ARTHROv5_10320	Diguanylate cyclase	0.185158	0.281392
ARTHROv5_10320_ARTHROv5_10321_ig	ARTHROv5_10320_ARTHROv5_10321_ig	---	0.178534	0.841858
ARTHROv5_10321	norR	Transcriptional regulator, Crp/Fnr family, Cyclic nucleotide-binding domain	-0.111422	0.559783
ARTHROv5_10321_ARTHROv5_10322_ig	ARTHROv5_10321_ARTHROv5_10322_ig	---	0.500734	0.43902
ARTHROv5_10322	ARTHROv5_10322	conserved protein of unknown function	-0.143304	0.333742
ARTHROv5_10322_ARTHROv5_10323_ig	ARTHROv5_10322_ARTHROv5_10323_ig	---	-0.380263	0.471058
ARTHROv5_10323	norB	Nitric oxide reductase subunit B (Nitric oxide reductase cytochrome b subunit) (NOR large subunit)	-2.56109	0.000275362
ARTHROv5_10323_ARTHROv5_10324_ig	ARTHROv5_10323_ARTHROv5_10324_ig	---	-3.09586	0.00242483
ARTHROv5_10324	glbN	Cyanoglobin (Hemoglobin) (Hb)	-1.70168	0.00292092
ARTHROv5_10324_ARTHROv5_10325_ig	ARTHROv5_10324_ARTHROv5_10325_ig	---	-1.03164	0.0728692
ARTHROv5_10325	narH	Nitrate reductase, beta subunit (fragment)	-0.825299	0.0261312
ARTHROv5_10326	narH	Respiratory nitrate reductase beta chain (fragment 2)	0.917293	0.0213054
ARTHROv5_10326_ARTHROv5_10327_ig	ARTHROv5_10326_ARTHROv5_10327_ig	---	0.374293	0.25111
ARTHROv5_10327	narH	Nitrate reductase, beta subunit (fragment 3)	0.214516	0.667239
ARTHROv5_10328	ARTHROv5_10328	putative tRNA (5-methylaminomethyl-2-thiouridylate)-methyltransferase (fragment 4)	-0.762692	0.306296
ARTHROv5_10329	narH	Respiratory nitrate reductase beta subunit (fragment)	-0.55157	0.166699
ARTHROv5_10329_ARTHROv5_10330_ig	ARTHROv5_10329_ARTHROv5_10330_ig	---	-0.777795	0.38374
ARTHROv5_10330	narJ	Nitrate reductase, delta subunit (fragment)	-0.190645	0.564341
ARTHROv5_10330_ARTHROv5_10331_ig	ARTHROv5_10330_ARTHROv5_10331_ig	---	-0.025891	0.881321
ARTHROv5_10331	narI	nitrate reductase, gamma (cytochrome b(NR)) subunit (fragment)	-0.710179	0.331803
ARTHROv5_10332	ARTHROv5_10332	conserved protein of unknown function	-0.724667	0.0325775
ARTHROv5_10333	ARTHROv5_10333	conserved protein of unknown function	-0.574882	0.028224
ARTHROv5_10333_ARTHROv5_10334_ig	ARTHROv5_10333_ARTHROv5_10334_ig	---	0.390359	0.272188
ARTHROv5_10334	ARTHROv5_10334	protein of unknown function	-0.0689144	0.84669
ARTHROv5_10334_ARTHROv5_10335_ig	ARTHROv5_10334_ARTHROv5_10335_ig	---	0.150104	0.634242
ARTHROv5_10335	narG	fragment of nitrate reductase 1, alpha subunit (part 1)	-0.488642	0.2954
ARTHROv5_10335_ARTHROv5_10336_ig	ARTHROv5_10335_ARTHROv5_10336_ig	---	0.0212749	0.96733
ARTHROv5_10336	narG	fragment of nitrate reductase 1, alpha subunit (part 2)	0.902973	0.0131321
ARTHROv5_10337	gcvT	Aminomethyltransferase	0.910961	0.00547301
ARTHROv5_10337_ARTHROv5_10338_ig	ARTHROv5_10337_ARTHROv5_10338_ig	---	0.460056	0.384465
ARTHROv5_10338	ARTHROv5_10338	conserved exported protein of unknown function	0.181375	0.175334
ARTHROv5_10338_ARTHROv5_10339_ig	ARTHROv5_10338_ARTHROv5_10339_ig	---	-0.237414	0.164569
ARTHROv5_10339	ARTHROv5_10339	Na+/solute symporter	-0.0211494	0.953326
ARTHROv5_10339_ARTHROv5_10340_ig	ARTHROv5_10339_ARTHROv5_10340_ig	---	-0.412427	0.401635
ARTHROv5_10340	ARTHROv5_10340	conserved protein of unknown function	0.070251	0.740904
ARTHROv5_10340_ARTHROv5_10341_ig	ARTHROv5_10340_ARTHROv5_10341_ig	---	-0.825985	0.430292
ARTHROv5_10341	ARTHROv5_10341	SMC domain protein	-0.0783116	0.654563
ARTHROv5_10342	ARTHROv5_10342	conserved protein of unknown function	-0.0100488	0.94959
ARTHROv5_10343	ARTHROv5_10343	conserved protein of unknown function	-0.638143	0.00398073
ARTHROv5_10344	ARTHROv5_10344	CMP/dCMP deaminase zinc-binding	-0.750738	0.0166212
ARTHROv5_10345	dut	deoxyuridinetriphosphatase	-0.223443	0.721679
ARTHROv5_10346	ARTHROv5_10346	Thymidylate synthase, flavin-dependent	-0.830827	0.00698445
ARTHROv5_10347	ARTHROv5_10347	Conserved hypothetical protein; putative guanosine polyphosphate pyrophosphohydrolases/synthetases	1.25828	0.00398073
ARTHROv5_10348	malK	fused maltose transport subunit, ATP-binding component of ABC superfamily ; regulatory protein	0.914309	0.00928458
ARTHROv5_10348_ARTHROv5_10349_ig	ARTHROv5_10348_ARTHROv5_10349_ig	---	-0.159026	0.716772
ARTHROv5_10349	ARTHROv5_10349	conserved protein of unknown function	-0.205147	0.390222
ARTHROv5_10350	ARTHROv5_10350	conserved protein of unknown function	-0.480311	0.0162787
ARTHROv5_10350_ARTHROv5_10351_ig	ARTHROv5_10350_ARTHROv5_10351_ig	---	-0.32685	0.0528221
ARTHROv5_10351	ARTHROv5_10351	conserved protein of unknown function	0.363034	0.0672131
ARTHROv5_10352	ARTHROv5_10352	conserved protein of unknown function	-0.0492142	0.877127
ARTHROv5_10352_ARTHROv5_10353_ig	ARTHROv5_10352_ARTHROv5_10353_ig	---	0.0786785	0.579015
ARTHROv5_10353	ARTHROv5_10353	Glycerophosphoryl diester phosphodiesterase	1.31968	0.00466883
ARTHROv5_10354	ARTHROv5_10354	haloalkane dehalogenase	1.03916	0.000865939
ARTHROv5_10354_ARTHROv5_10355_ig	ARTHROv5_10354_ARTHROv5_10355_ig	---	0.336575	0.227905
ARTHROv5_10355	recQ	ATP-dependent DNA helicase (RecQ family)	-0.491637	0.0256929
ARTHROv5_10356	ARTHROv5_10356	protein of unknown function	-0.204068	0.250944
ARTHROv5_10356_ARTHROv5_10357_ig	ARTHROv5_10356_ARTHROv5_10357_ig	---	-0.401542	0.306938
ARTHROv5_10357	pep	prolyl endopeptidase (PE) (Post-proline cleaving enzyme)	-0.512382	0.0268239
ARTHROv5_10358	ARTHROv5_10358	conserved protein of unknown function	0.257109	0.404986
ARTHROv5_10359	ARTHROv5_10359	Heat shock protein DnaJ-like	-0.648301	0.270248
ARTHROv5_10360	ARTHROv5_10360	putative Peptidase M, neutral zinc metallopeptidases, zinc-binding site	0.401846	0.0859797
ARTHROv5_10361	ARTHROv5_10361	conserved protein of unknown function	0.0145522	0.942101
ARTHROv5_10362	dnaK5	Chaperone protein DnaK	0.518527	0.00616406
ARTHROv5_10362_ARTHROv5_10363_ig	ARTHROv5_10362_ARTHROv5_10363_ig	---	-0.126664	0.85108
ARTHROv5_10363	ARTHROv5_10363	protein of unknown function	-0.0471953	0.80641
ARTHROv5_10363_ARTHROv5_10364_ig	ARTHROv5_10363_ARTHROv5_10364_ig	---	0.372523	0.159093
ARTHROv5_10364	ARTHROv5_10364	Methyltransferase type 11	-0.00424139	0.984923
ARTHROv5_10364_ARTHROv5_10365_ig	ARTHROv5_10364_ARTHROv5_10365_ig	---	-0.658558	0.166695
ARTHROv5_10365	mobA	molybdopterin-guanine dinucleotide biosynthesis protein A	0.0704231	0.58553
ARTHROv5_10366	ARTHROv5_10366	conserved protein of unknown function	0.426143	0.109815
ARTHROv5_10367	ARTHROv5_10367	conserved protein of unknown function	1.0368	0.00237707
ARTHROv5_10367_ARTHROv5_10368_ig	ARTHROv5_10367_ARTHROv5_10368_ig	---	1.01635	0.0032074
ARTHROv5_10368	ARTHROv5_10368	GCN5-related N-acetyltransferase	0.923017	0.00206066
ARTHROv5_10369	ARTHROv5_10369	conserved exported protein of unknown function	1.0414	0.00661924
ARTHROv5_10369_ARTHROv5_10370_ig	ARTHROv5_10369_ARTHROv5_10370_ig	---	0.858976	0.0541243
ARTHROv5_10370	ARTHROv5_10370	Putative Heat shock protein DnaJ domain protein	0.28919	0.433076
ARTHROv5_10370_ARTHROv5_10371_ig	ARTHROv5_10370_ARTHROv5_10371_ig	---	-0.482386	0.468213
ARTHROv5_10371	ARTHROv5_10371	conserved protein of unknown function	-0.000419362	0.998702
ARTHROv5_10371_ARTHROv5_10372_ig	ARTHROv5_10371_ARTHROv5_10372_ig	---	0.29465	0.276299
ARTHROv5_10372	aroE	Shikimate dehydrogenase	-0.079504	0.834568
ARTHROv5_10372_ARTHROv5_10373_ig	ARTHROv5_10372_ARTHROv5_10373_ig	---	0.205602	0.410784
ARTHROv5_10373	ARTHROv5_10373	conserved protein of unknown function	0.231688	0.154842
ARTHROv5_10373_ARTHROv5_10374_ig	ARTHROv5_10373_ARTHROv5_10374_ig	---	0.391014	0.0781796
ARTHROv5_10374	ARTHROv5_10374	conserved protein of unknown function	0.663231	0.00372012
ARTHROv5_10375	ARTHROv5_10375	Band 7 protein	0.77118	0.0027726
ARTHROv5_10375_ARTHROv5_10376_ig	ARTHROv5_10375_ARTHROv5_10376_ig	---	1.29397	0.00572822
ARTHROv5_10376	ARTHROv5_10376	conserved protein of unknown function	0.822682	0.0154893
ARTHROv5_10376_ARTHROv5_10377_ig	ARTHROv5_10376_ARTHROv5_10377_ig	---	0.118946	0.744677
ARTHROv5_10377	ARTHROv5_10377	Phage SPO1 DNA polymerase-related protein	-0.358978	0.0490968
ARTHROv5_10378	ARTHROv5_10378	Phosphoribosyltransferase	1.26627	0.00233786
ARTHROv5_10379	ARTHROv5_10379	putative TypeII restriction site-specific deoxyribonuclease	0.210851	0.321839
ARTHROv5_10380	ARTHROv5_10380	conserved protein of unknown function	0.0304977	0.851491
ARTHROv5_10381	yhdJ	methyltransferase	-0.262035	0.172655
ARTHROv5_10382	ARTHROv5_10382	Aminotransferase class V	-0.221576	0.161266
ARTHROv5_10382_ARTHROv5_10383_ig	ARTHROv5_10382_ARTHROv5_10383_ig	---	-0.654178	0.435296
ARTHROv5_10383	ARTHROv5_10383	conserved protein of unknown function	1.22848	0.00335432
ARTHROv5_10384	narM	nitrate reductase accessory protein	0.239515	0.43565
ARTHROv5_10385	hypE	carbamoyl phosphate phosphatase, hydrogenase 3 maturation protein	0.0626403	0.837561
ARTHROv5_10386	ARTHROv5_10386	conserved membrane protein of unknown function	0.231436	0.500496
ARTHROv5_10387	ARTHROv5_10387	conserved protein of unknown function	0.0670361	0.883942
ARTHROv5_10387_ARTHROv5_10388_ig	ARTHROv5_10387_ARTHROv5_10388_ig	---	0.020793	0.947472
ARTHROv5_10388	hypD	protein required for maturation of hydrogenases	0.380974	0.0866118
ARTHROv5_10388_ARTHROv5_10389_ig	ARTHROv5_10388_ARTHROv5_10389_ig	---	0.544571	0.0264937
ARTHROv5_10389	aapJ	General L-amino acid-binding periplasmic protein AapJ	0.272898	0.109808
ARTHROv5_10389_ARTHROv5_10390_ig	ARTHROv5_10389_ARTHROv5_10390_ig	---	0.0544769	0.730261
ARTHROv5_10390	ARTHROv5_10390	conserved protein of unknown function	0.477494	0.00895366
ARTHROv5_10390_ARTHROv5_10391_ig	ARTHROv5_10390_ARTHROv5_10391_ig	---	-0.240512	0.500496
ARTHROv5_10391	ARTHROv5_10391	conserved protein of unknown function	1.37437	0.000242881
ARTHROv5_10392	secF	Protein translocase subunit SecF	-0.288979	0.0920292
ARTHROv5_10393	secD	Protein translocase subunit SecD	0.496242	0.00908673
ARTHROv5_10393_ARTHROv5_10394_ig	ARTHROv5_10393_ARTHROv5_10394_ig	---	0.515273	0.116525
ARTHROv5_10394	pdhB	Pyruvate dehydrogenase E1 component subunit beta	0.853028	0.0623041
ARTHROv5_10394_ARTHROv5_10395_ig	ARTHROv5_10394_ARTHROv5_10395_ig	---	-0.939182	0.332243
ARTHROv5_10395	ARTHROv5_10395	Adenylate/guanylate cyclase with GAF sensor and FHA domain	1.22768	0.00064539
ARTHROv5_10395_ARTHROv5_10396_ig	ARTHROv5_10395_ARTHROv5_10396_ig	---	0.935237	0.00079496
ARTHROv5_10396	recF	DNA replication and repair protein recF. Gap repair protein	-0.432316	0.051827
ARTHROv5_10396_ARTHROv5_10397_ig	ARTHROv5_10396_ARTHROv5_10397_ig	---	-2.59351	0.000615311
ARTHROv5_10397	ARTHROv5_10397	conserved exported protein of unknown function	0.440799	0.022373
ARTHROv5_10397_ARTHROv5_10398_ig	ARTHROv5_10397_ARTHROv5_10398_ig	---	1.38005	0.0147774
ARTHROv5_10398	ARTHROv5_10398	conserved protein of unknown function	0.431836	0.0443176
ARTHROv5_10398_ARTHROv5_10399_ig	ARTHROv5_10398_ARTHROv5_10399_ig	---	0.054735	0.749433
ARTHROv5_10399	ARTHROv5_10399	putative two-component sensor histidine kinase	0.129472	0.260914
ARTHROv5_10399_ARTHROv5_10400_ig	ARTHROv5_10399_ARTHROv5_10400_ig	---	-0.892342	0.00260138
ARTHROv5_10400	ARTHROv5_10400	Response regulator receiver protein	-1.60195	0.00141865
ARTHROv5_10400_ARTHROv5_10401_ig	ARTHROv5_10400_ARTHROv5_10401_ig	---	-1.58882	0.000396483
ARTHROv5_10401	ARTHROv5_10401	putative 5'-nucleotidase	-0.600461	0.0152539
ARTHROv5_10401_ARTHROv5_10402_ig	ARTHROv5_10401_ARTHROv5_10402_ig	---	-2.19178	0.00326602
ARTHROv5_10402	pbsA	Heme oxygenase 1	-3.54616	4.57962e-05
ARTHROv5_10404	coaE	Dephospho-CoA kinase	0.210569	0.252177
ARTHROv5_10404_ARTHROv5_10405_ig	ARTHROv5_10404_ARTHROv5_10405_ig	---	0.233162	0.0828141
ARTHROv5_10405	ARTHROv5_10405	protein of unknown function	0.23304	0.0884842
ARTHROv5_10406	ARTHROv5_10406	conserved protein of unknown function	-0.0701749	0.655044
ARTHROv5_10406_ARTHROv5_10407_ig	ARTHROv5_10406_ARTHROv5_10407_ig	---	0.112491	0.453318
ARTHROv5_10408	ARTHROv5_10408	transposase	0.257874	0.0676346
ARTHROv5_10409_ARTHROv5_10410_ig	ARTHROv5_10409_ARTHROv5_10410_ig	---	0.0503927	0.723577
ARTHROv5_10410	ARTHROv5_10410	transposase, IS630 family (fragment)	0.409369	0.0329187
ARTHROv5_10411	ARTHROv5_10411	transposase (fragment)	0.834939	0.00264266
ARTHROv5_10412	ARTHROv5_10412	transposase	-0.0593176	0.721861
ARTHROv5_10415	ARTHROv5_10415	putative reverse transcriptase	0.0279868	0.823236
ARTHROv5_10415_ARTHROv5_10416_ig	ARTHROv5_10415_ARTHROv5_10416_ig	---	0.03751	0.767778
ARTHROv5_10417	ARTHROv5_10417	conserved protein of unknown function	-0.669432	0.0243151
ARTHROv5_10418	ARTHROv5_10418	conserved protein of unknown function	0.00448011	0.98951
ARTHROv5_10419	ARTHROv5_10419	conserved protein of unknown function	0.440509	0.118104
ARTHROv5_10420	ARTHROv5_10420	conserved protein of unknown function	0.660655	0.00251557
ARTHROv5_10421	ARTHROv5_10421	transposase	0.214974	0.255886
ARTHROv5_10422_ARTHROv5_10423_ig	ARTHROv5_10422_ARTHROv5_10423_ig	---	0.199205	0.152447
ARTHROv5_10423	ARTHROv5_10423	putative Short-chain dehydrogenase/reductase family (SDR); Glucose/ribitol dehydrogenase	0.0116247	0.933651
ARTHROv5_10423_ARTHROv5_10424_ig	ARTHROv5_10423_ARTHROv5_10424_ig	---	0.0125544	0.960278
ARTHROv5_10424	ARTHROv5_10424	PAS/PAC sensor signal transduction histidine kinase	-0.495561	0.0166167
ARTHROv5_10425	ARTHROv5_10425	putative transcriptional regulator	0.202385	0.305584
ARTHROv5_10425_ARTHROv5_10426_ig	ARTHROv5_10425_ARTHROv5_10426_ig	---	-0.78091	0.00745891
ARTHROv5_10426	ARTHROv5_10426	Abortive infection protein	-1.29098	0.008826
ARTHROv5_10427	ARTHROv5_10427	conserved protein of unknown function	-0.265065	0.0990033
ARTHROv5_10428	ARTHROv5_10428	conserved protein of unknown function	-0.264935	0.0841718
ARTHROv5_10429	ARTHROv5_10429	conserved protein of unknown function	-0.418474	0.0161525
ARTHROv5_10430	petF	Ferredoxin-2	0.187141	0.384465
ARTHROv5_10430_ARTHROv5_10431_ig	ARTHROv5_10430_ARTHROv5_10431_ig	---	-0.0526535	0.758495
ARTHROv5_10431	ARTHROv5_10431	conserved membrane protein of unknown function	-0.613787	0.00607244
ARTHROv5_10432	ARTHROv5_10432	conserved protein of unknown function	-0.0985061	0.625564
ARTHROv5_10432_ARTHROv5_10433_ig	ARTHROv5_10432_ARTHROv5_10433_ig	---	-0.536677	0.0358675
ARTHROv5_10433	ARTHROv5_10433	Ferredoxin thioredoxin reductase alpha chain	-0.725158	0.00256707
ARTHROv5_10433_ARTHROv5_10434_ig	ARTHROv5_10433_ARTHROv5_10434_ig	---	-0.807542	0.00150168
ARTHROv5_10434	ARTHROv5_10434	conserved protein of unknown function	-0.859349	0.00193339
ARTHROv5_10435	ARTHROv5_10435	conserved protein of unknown function	0.160562	0.282884
ARTHROv5_10435_ARTHROv5_10436_ig	ARTHROv5_10435_ARTHROv5_10436_ig	---	-0.101168	0.806054
ARTHROv5_10436	pps	phosphoenolpyruvate synthase	0.861308	0.000712303
ARTHROv5_10436_ARTHROv5_10437_ig	ARTHROv5_10436_ARTHROv5_10437_ig	---	2.05845	0.000120999
ARTHROv5_10437	ARTHROv5_10437	Transcriptional regulator, HxlR family	0.741255	0.014408
ARTHROv5_10438	ARTHROv5_10438	conserved protein of unknown function	1.7097	0.00143336
ARTHROv5_10438_ARTHROv5_10439_ig	ARTHROv5_10438_ARTHROv5_10439_ig	---	1.17346	0.0156895
ARTHROv5_10439	ARTHROv5_10439	conserved protein of unknown function	0.559953	0.318551
ARTHROv5_10440	ARTHROv5_10440	Response regulator receiver modulated diguanylate cyclase/phosphodiesterase with PAS/PAC sensor(S) (fragment)	-0.445898	0.256957
ARTHROv5_10440_ARTHROv5_10441_ig	ARTHROv5_10440_ARTHROv5_10441_ig	---	-2.06273	0.00419739
ARTHROv5_10441	ARTHROv5_10441	protein of unknown function	-1.95763	0.00128797
ARTHROv5_10441_ARTHROv5_10442_ig	ARTHROv5_10441_ARTHROv5_10442_ig	---	-0.0119697	0.98138
ARTHROv5_10442	pta	phosphate acetyltransferase	-0.0172053	0.913604
ARTHROv5_10442_ARTHROv5_10443_ig	ARTHROv5_10442_ARTHROv5_10443_ig	---	1.19142	0.0961168
ARTHROv5_10443	pgi	Glucose-6-phosphate isomerase	-0.0937134	0.570182
ARTHROv5_10443_ARTHROv5_10444_ig	ARTHROv5_10443_ARTHROv5_10444_ig	---	-1.12346	0.00256416
ARTHROv5_10444	ARTHROv5_10444	conserved protein of unknown function	-1.24363	0.0073263
ARTHROv5_10445	ARTHROv5_10445	HNH endonuclease	-0.095463	0.402191
ARTHROv5_10446	ARTHROv5_10446	conserved protein of unknown function	-0.180198	0.183542
ARTHROv5_10446_ARTHROv5_10447_ig	ARTHROv5_10446_ARTHROv5_10447_ig	---	-0.0584362	0.830148
ARTHROv5_10447	ARTHROv5_10447	conserved protein of unknown function	0.756245	0.0742934
ARTHROv5_10448	ARTHROv5_10448	Ser/Thr protein kinase	0.686811	0.00253393
ARTHROv5_10449	ARTHROv5_10449	protein of unknown function	0.800897	0.0039239
ARTHROv5_10449_ARTHROv5_10450_ig	ARTHROv5_10449_ARTHROv5_10450_ig	---	-0.374193	0.433139
ARTHROv5_10450	ARTHROv5_10450	von Willebrand factor type A	0.744775	0.0547271
ARTHROv5_10451	ARTHROv5_10451	conserved hypothetical protein	0.188316	0.331871
ARTHROv5_10451_ARTHROv5_10452_ig	ARTHROv5_10451_ARTHROv5_10452_ig	---	0.430311	0.189846
ARTHROv5_10452	ARTHROv5_10452	Conserved protein of unknown function; putative cupin region	1.04544	0.00380525
ARTHROv5_10453	thrB	Homoserine kinase (HSK) (HK)	0.345652	0.0317081
ARTHROv5_10454	ARTHROv5_10454	conserved protein of unknown function	-0.806853	0.00135138
ARTHROv5_10455	ARTHROv5_10455	protein of unknown function	-0.674466	0.0128187
ARTHROv5_10455_ARTHROv5_10456_ig	ARTHROv5_10455_ARTHROv5_10456_ig	---	-0.482058	0.0251002
ARTHROv5_10456	hyuA	5-oxoprolinase (5-oxo-L-prolinase) (5-OPase) (Pyroglutamase)	0.484877	0.144842
ARTHROv5_10456_ARTHROv5_10457_ig	ARTHROv5_10456_ARTHROv5_10457_ig	---	-0.483954	0.0715485
ARTHROv5_10457	ARTHROv5_10457	protein of unknown function	-0.514326	0.0523429
ARTHROv5_10457_ARTHROv5_10458_ig	ARTHROv5_10457_ARTHROv5_10458_ig	---	0.135763	0.46438
ARTHROv5_10458	ARTHROv5_10458	GntR family transcriptional regulatory protein	-0.0105563	0.968114
ARTHROv5_10459	ARTHROv5_10459	putative diguanylate cyclase (fragment)	-1.85481	0.00264404
ARTHROv5_10460	ARTHROv5_10460	conserved protein of unknown function	-2.61793	0.00212887
ARTHROv5_10460_ARTHROv5_10461_ig	ARTHROv5_10460_ARTHROv5_10461_ig	---	-0.372038	0.0566558
ARTHROv5_10461	ARTHROv5_10461	MAPEG family protein (Membrane-associated protein in eicosanoid and glutathione metabolism)	-0.537437	0.0235575
ARTHROv5_10462	ARTHROv5_10462	conserved protein of unknown function	0.41386	0.036646
ARTHROv5_10463	ARTHROv5_10463	conserved protein of unknown function	0.607228	0.0433447
ARTHROv5_10464	ARTHROv5_10464	conserved membrane protein of unknown function	0.580419	0.030629
ARTHROv5_10465	ARTHROv5_10465	conserved protein of unknown function	0.853517	0.00127515
ARTHROv5_10466	ARTHROv5_10466	Transcriptional regulator, XRE family	1.13834	0.000865939
ARTHROv5_10466_ARTHROv5_10467_ig	ARTHROv5_10466_ARTHROv5_10467_ig	---	0.596275	0.102894
ARTHROv5_10467	ARTHROv5_10467	conserved hypothetical protein	0.285913	0.295356
ARTHROv5_10468	ARTHROv5_10468	conserved hypothetical protein	0.357069	0.163744
ARTHROv5_10468_ARTHROv5_10469_ig	ARTHROv5_10468_ARTHROv5_10469_ig	---	0.531117	0.13749
ARTHROv5_10469	ARTHROv5_10469	conserved hypothetical protein	0.25024	0.307899
ARTHROv5_10470	ARTHROv5_10470	conserved hypothetical protein	-0.0170733	0.931691
ARTHROv5_10471	ARTHROv5_10471	conserved hypothetical protein	0.0648841	0.676997
ARTHROv5_10471_ARTHROv5_10472_ig	ARTHROv5_10471_ARTHROv5_10472_ig	---	0.0395423	0.921265
ARTHROv5_10472	ARTHROv5_10472	putative ABC-type phosphate transport system, periplasmic component, PstS-like	0.234506	0.175393
ARTHROv5_10472_ARTHROv5_10474_ig	ARTHROv5_10472_ARTHROv5_10474_ig	---	-0.59678	0.505022
ARTHROv5_10474	ARTHROv5_10474	conserved protein of unknown function	-0.339642	0.398412
ARTHROv5_10475	ARTHROv5_10475	hypothetical protein (membrane)	-1.2373	0.00122151
ARTHROv5_10475_ARTHROv5_10476_ig	ARTHROv5_10475_ARTHROv5_10476_ig	---	0.293635	0.0518461
ARTHROv5_10476	ARTHROv5_10476	conserved hypothetical protein	-0.523028	0.00803923
ARTHROv5_10477	ARTHROv5_10477	conserved hypothetical protein (membrane)	-0.939217	0.0190279
ARTHROv5_10478	ARTHROv5_10478	hypothetical protein	-0.352934	0.0878227
ARTHROv5_10478_ARTHROv5_10479_ig	ARTHROv5_10478_ARTHROv5_10479_ig	---	-0.204354	0.621946
ARTHROv5_10479	ARTHROv5_10479	putative Calvin cycle regulator CP12-like protein	-0.317277	0.0420462
ARTHROv5_10479_ARTHROv5_10480_ig	ARTHROv5_10479_ARTHROv5_10480_ig	---	-0.00112287	0.997133
ARTHROv5_10480	ARTHROv5_10480	conserved hypothetical protein	0.431199	0.154073
ARTHROv5_10481	ARTHROv5_10481	putative estradiol 17-beta-dehydrogenase	-0.56296	0.00921108
ARTHROv5_10481_ARTHROv5_10482_ig	ARTHROv5_10481_ARTHROv5_10482_ig	---	-2.25018	0.00135138
ARTHROv5_10482	ARTHROv5_10482	conserved hypothetical protein (secreted)	-0.643229	0.00535571
ARTHROv5_10483	ARTHROv5_10483	putative Glycine/D-amino acid oxidase	-0.430331	0.0295958
ARTHROv5_10484	ARTHROv5_10484	putative branched-chain amino acid ABC transporter, ATP-binding protein	1.20423	0.0414546
ARTHROv5_10485	livG	leucine/isoleucine/valine transporter subunit ; ATP-binding component of ABC superfamily	1.47962	0.0117866
ARTHROv5_10486	ARTHROv5_10486	putative leucine/isoleucine/valine transporter subunit ; membrane component of ABC superfamily, LivM-like	1.62893	0.0132582
ARTHROv5_10487	ARTHROv5_10487	putative leucine/isoleucine/valine transporter subunit ; membrane component of ABC superfamily, LivH-like	1.72484	0.00640204
ARTHROv5_10487_ARTHROv5_10488_ig	ARTHROv5_10487_ARTHROv5_10488_ig	---	0.678654	0.236024
ARTHROv5_10488	ARTHROv5_10488	putative ABC-type branched-chain amino acid transport systems, periplasmic component, LivJ-like	0.8663	0.0574661
ARTHROv5_10488_ARTHROv5_10489_ig	ARTHROv5_10488_ARTHROv5_10489_ig	---	0.593384	0.0731397
ARTHROv5_10489	ARTHROv5_10489	putative tripartite ATP-independent C4-dicarboxylate transport system permease, DctM subunit (large permease component)	-0.263129	0.358806
ARTHROv5_10490	ARTHROv5_10490	hypothetical protein	0.564617	0.00436599
ARTHROv5_10490_ARTHROv5_10491_ig	ARTHROv5_10490_ARTHROv5_10491_ig	---	1.20645	0.00586196
ARTHROv5_10491	amyA	cytoplasmic alpha-amylase	0.29214	0.0495676
ARTHROv5_10491_ARTHROv5_10492_ig	ARTHROv5_10491_ARTHROv5_10492_ig	---	1.20446	0.0342137
ARTHROv5_10492	ftsH4	ATP-dependent zinc-metalloprotease	0.271223	0.0488634
ARTHROv5_10492_ARTHROv5_10493_ig	ARTHROv5_10492_ARTHROv5_10493_ig	---	0.515724	0.0169514
ARTHROv5_10493	ARTHROv5_10493	Putative patatin-like phospholipase	0.0815183	0.734257
ARTHROv5_10494	ARTHROv5_10494	hypothetical protein	-0.094306	0.637495
ARTHROv5_10495	ARTHROv5_10495	Putative patatin-like phospholipase	0.178844	0.323565
ARTHROv5_10495_ARTHROv5_10496_ig	ARTHROv5_10495_ARTHROv5_10496_ig	---	0.758296	0.00779775
ARTHROv5_10496	ARTHROv5_10496	putative transposase, IS605 family (fragment)	0.11934	0.30456
ARTHROv5_10497_ARTHROv5_10498_ig	ARTHROv5_10497_ARTHROv5_10498_ig	---	0.249137	0.113277
ARTHROv5_10498	ARTHROv5_10498	putative transposase, IS605 family (fragment)	0.215526	0.104721
ARTHROv5_10499	phaE	Poly(R)-hydroxyalkanoic acid synthase, class III, PhaE subunit	-0.550262	0.0147419
ARTHROv5_10500	phaC	Poly(R)-hydroxyalkanoic acid synthase, class III, PhaC subunit	-0.257305	0.230664
ARTHROv5_10501	ARTHROv5_10501	conserved hypothetical protein	0.487021	0.0177072
ARTHROv5_10501_ARTHROv5_10502_ig	ARTHROv5_10501_ARTHROv5_10502_ig	---	-0.382926	0.331017
ARTHROv5_10502	ARTHROv5_10502	putative lysophospholipase	0.240824	0.124791
ARTHROv5_10503	ARTHROv5_10503	conserved hypothetical protein	0.383896	0.0507071
ARTHROv5_10503_ARTHROv5_10504_ig	ARTHROv5_10503_ARTHROv5_10504_ig	---	0.605001	0.0632396
ARTHROv5_10504	ARTHROv5_10504	conserved protein of unknown function	-0.29065	0.0530939
ARTHROv5_10505	ARTHROv5_10505	conserved hypothetical protein	-0.389546	0.0413862
ARTHROv5_10505_ARTHROv5_10506_ig	ARTHROv5_10505_ARTHROv5_10506_ig	---	-0.0398575	0.775999
ARTHROv5_10506	ARTHROv5_10506	putative two-component transcriptional regulator (modular protein)	-0.444303	0.0463474
ARTHROv5_10507	ARTHROv5_10507	putative permease	-1.17478	0.0234389
ARTHROv5_10507_ARTHROv5_10508_ig	ARTHROv5_10507_ARTHROv5_10508_ig	---	-1.4545	0.0756026
ARTHROv5_10508	hdhA1	7-alpha-hydroxysteroid dehydrogenase, NAD-dependent	-1.88205	0.00606024
ARTHROv5_10509	hdhA2	7-alpha-hydroxysteroid dehydrogenase, NAD-dependent	-0.569474	0.0924205
ARTHROv5_10509_ARTHROv5_10510_ig	ARTHROv5_10509_ARTHROv5_10510_ig	---	0.105472	0.586522
ARTHROv5_10510	ARTHROv5_10510	putative transposase, IS630 family (fragment)	-1.37771	0.00544704
ARTHROv5_10510_ARTHROv5_10511_ig	ARTHROv5_10510_ARTHROv5_10511_ig	---	-0.288591	0.116338
ARTHROv5_10511	ARTHROv5_10511	protein of unknown function	0.477436	0.0129072
ARTHROv5_10512	ARTHROv5_10512	transposase, IS630 family (fragment)	0.798713	0.00379728
ARTHROv5_10513	ARTHROv5_10513	putative transposase, IS630 family (fragment)	0.420301	0.0507071
ARTHROv5_10514	ARTHROv5_10514	hypothetical protein	-0.0897369	0.754573
ARTHROv5_10514_ARTHROv5_tRNA42_ig	ARTHROv5_10514_ARTHROv5_tRNA42_ig	---	0.153013	0.337294
ARTHROv5_10515	ARTHROv5_10515	putative Tyrosine recombinase, XerD-like	-0.529702	0.00842703
ARTHROv5_10516	ARTHROv5_10516	hypothetical protein	0.452897	0.021066
ARTHROv5_10516_ARTHROv5_10517_ig	ARTHROv5_10516_ARTHROv5_10517_ig	---	0.689468	0.0518712
ARTHROv5_10517	ARTHROv5_10517	hypothetical protein (secreted)	-0.111551	0.577839
ARTHROv5_10517_ARTHROv5_10518_ig	ARTHROv5_10517_ARTHROv5_10518_ig	---	0.10934	0.719598
ARTHROv5_10518	ARTHROv5_10518	hypothetical protein	0.467642	0.475123
ARTHROv5_10519	ARTHROv5_10519	hypothetical protein	-1.10168	0.00249722
ARTHROv5_10520	ARTHROv5_10520	hypothetical protein (membrane)	-0.716953	0.159231
ARTHROv5_10521	ARTHROv5_10521	hypothetical protein	-0.273652	0.237306
ARTHROv5_10521_ARTHROv5_10522_ig	ARTHROv5_10521_ARTHROv5_10522_ig	---	-1.09364	0.0330592
ARTHROv5_10522	ARTHROv5_10522	hypothetical protein	-0.284425	0.671462
ARTHROv5_10523	ARTHROv5_10523	hypothetical protein	0.973212	0.083115
ARTHROv5_10524	ARTHROv5_10524	conserved protein of unknown function	0.736551	0.129582
ARTHROv5_10524_ARTHROv5_10525_ig	ARTHROv5_10524_ARTHROv5_10525_ig	---	0.106512	0.925083
ARTHROv5_10525	ARTHROv5_10525	conserved protein of unknown function	0.982887	0.102522
ARTHROv5_10525_ARTHROv5_10526_ig	ARTHROv5_10525_ARTHROv5_10526_ig	---	0.194787	0.166683
ARTHROv5_10526	ARTHROv5_10526	hypothetical protein (fragment)	1.02652	0.00643614
ARTHROv5_10526_ARTHROv5_tRNA41_ig	ARTHROv5_10526_ARTHROv5_tRNA41_ig	---	2.2638	0.00102706
ARTHROv5_10527	pykF2	pyruvate kinase 2	0.683053	0.140694
ARTHROv5_10527_ARTHROv5_10528_ig	ARTHROv5_10527_ARTHROv5_10528_ig	---	-0.141848	0.557155
ARTHROv5_10528	ARTHROv5_10528	conserved protein of unknown function	-0.305659	0.312781
ARTHROv5_10528_ARTHROv5_10529_ig	ARTHROv5_10528_ARTHROv5_10529_ig	---	-0.194894	0.480116
ARTHROv5_10529	ARTHROv5_10529	conserved hypothetical protein	-0.0828006	0.713348
ARTHROv5_10529_ARTHROv5_10530_ig	ARTHROv5_10529_ARTHROv5_10530_ig	---	0.0989855	0.621288
ARTHROv5_10530	ARTHROv5_10530	conserved protein of unknown function	0.132325	0.438586
ARTHROv5_10531_ARTHROv5_10532_ig	ARTHROv5_10531_ARTHROv5_10532_ig	---	0.128392	0.72528
ARTHROv5_10532	ARTHROv5_10532	hypothetical protein	0.528328	0.00833287
ARTHROv5_10533	ARTHROv5_10533	GUN4 domain protein	1.32027	0.00228213
ARTHROv5_10534	ARTHROv5_10534	conserved protein of unknown function	2.21694	0.000995143
ARTHROv5_10535	ARTHROv5_10535	conserved hypothetical protein	1.47182	0.00839407
ARTHROv5_10536	ARTHROv5_10536	Serine/threonine protein kinase	1.78766	0.000843789
ARTHROv5_10536_ARTHROv5_10537_ig	ARTHROv5_10536_ARTHROv5_10537_ig	---	-0.202783	0.331909
ARTHROv5_10537	ARTHROv5_10537	FHA modulated ABC efflux pump with fused ATPase and integral membrane subunits	1.37381	0.0100797
ARTHROv5_10538	ARTHROv5_10538	protein of unknown function	1.11272	0.0893747
ARTHROv5_10538_ARTHROv5_10539_ig	ARTHROv5_10538_ARTHROv5_10539_ig	---	0.652301	0.172156
ARTHROv5_10539	ARTHROv5_10539	Chromosome partitioning protein, ParB family	0.242067	0.125588
ARTHROv5_10544	ARTHROv5_10544	protein of unknown function	2.62608	0.000490441
ARTHROv5_10544_ARTHROv5_10545_ig	ARTHROv5_10544_ARTHROv5_10545_ig	---	0.0665709	0.583871
ARTHROv5_10545	ARTHROv5_10545	conserved protein of unknown function	0.038601	0.795045
ARTHROv5_10546	ARTHROv5_10546	conserved protein of unknown function	0.0285498	0.849305
ARTHROv5_10546_ARTHROv5_10547_ig	ARTHROv5_10546_ARTHROv5_10547_ig	---	-0.0142577	0.928244
ARTHROv5_10547	ARTHROv5_10547	Putative retrointron (fragment)	-0.0690894	0.580728
ARTHROv5_10548	ARTHROv5_10548	Putative retrointron (fragment)	-0.0591589	0.64718
ARTHROv5_10553_ARTHROv5_10554_ig	ARTHROv5_10553_ARTHROv5_10554_ig	---	0.00438951	0.972209
ARTHROv5_10554	ARTHROv5_10554	reverse transcriptase (fragment)	-0.134091	0.251323
ARTHROv5_10554_ARTHROv5_10555_ig	ARTHROv5_10554_ARTHROv5_10555_ig	---	0.360328	0.0530514
ARTHROv5_10556	ARTHROv5_10556	conserved protein of unknown function	0.239646	0.130557
ARTHROv5_10557	ARTHROv5_10557	Putative Group II intron-encoded protein LtrA-like [Includes: Reverse-transcriptase ; RNA maturase ; HNH endonuclease] (fragment)	0.324986	0.0334985
ARTHROv5_10558	ARTHROv5_10558	conserved protein of unknown function	-0.0637914	0.585944
ARTHROv5_10559	ARTHROv5_10559	conserved protein of unknown function	-0.0365689	0.804741
ARTHROv5_10559_ARTHROv5_10560_ig	ARTHROv5_10559_ARTHROv5_10560_ig	---	-0.0318902	0.785775
ARTHROv5_10560	ARTHROv5_10560	hypothetical protein	0.110478	0.357842
ARTHROv5_10560_ARTHROv5_10561_ig	ARTHROv5_10560_ARTHROv5_10561_ig	---	0.0947483	0.512486
ARTHROv5_10561	ARTHROv5_10561	hypothetical protein	0.219077	0.205699
ARTHROv5_10561_ARTHROv5_misc_RNA_107_ig	ARTHROv5_10561_ARTHROv5_misc_RNA_107_ig	---	0.2669	0.374883
ARTHROv5_10562	ARTHROv5_10562	Reverse transcriptase (fragment)	0.344867	0.143407
ARTHROv5_10563	ARTHROv5_10563	conserved protein of unknown function	0.672447	0.00242745
ARTHROv5_10564	ARTHROv5_10564	transposase, IS630 family (fragment)	0.860905	0.00387872
ARTHROv5_10564_ARTHROv5_10565_ig	ARTHROv5_10564_ARTHROv5_10565_ig	---	0.0767111	0.907222
ARTHROv5_10565	ARTHROv5_10565	transposase	-0.130761	0.601873
ARTHROv5_10565_ARTHROv5_10566_ig	ARTHROv5_10565_ARTHROv5_10566_ig	---	0.0759327	0.809755
ARTHROv5_10568	ARTHROv5_10568	transposase	0.0200604	0.914967
ARTHROv5_10569	ARTHROv5_10569	protein of unknown function	0.141243	0.451563
ARTHROv5_10569_ARTHROv5_10570_ig	ARTHROv5_10569_ARTHROv5_10570_ig	---	0.717002	0.02185
ARTHROv5_10570	ARTHROv5_10570	transposase	-0.987385	0.00228213
ARTHROv5_10570_ARTHROv5_10571_ig	ARTHROv5_10570_ARTHROv5_10571_ig	---	-1.32124	0.000490441
ARTHROv5_10571	ARTHROv5_10571	hypothetical protein	-1.14309	0.000573901
ARTHROv5_10572	ARTHROv5_10572	conserved protein of unknown function	-0.43018	0.0828141
ARTHROv5_10572_ARTHROv5_10573_ig	ARTHROv5_10572_ARTHROv5_10573_ig	---	-0.170534	0.732074
ARTHROv5_10573	ARTHROv5_10573	conserved protein of unknown function	-0.0420798	0.922899
ARTHROv5_10574	ARTHROv5_10574	hypothetical protein (fragment)	0.445934	0.230906
ARTHROv5_10575	ARTHROv5_10575	hypothetical protein (fragment)	0.651936	0.1485
ARTHROv5_10575_ARTHROv5_10576_ig	ARTHROv5_10575_ARTHROv5_10576_ig	---	0.715817	0.149803
ARTHROv5_10576	ARTHROv5_10576	transposase, IS630 family (fragment)	0.28761	0.0875542
ARTHROv5_10576_ARTHROv5_10577_ig	ARTHROv5_10576_ARTHROv5_10577_ig	---	0.200137	0.251319
ARTHROv5_10577	ARTHROv5_10577	transposase	0.514447	0.0765295
ARTHROv5_10577_ARTHROv5_10578_ig	ARTHROv5_10577_ARTHROv5_10578_ig	---	-0.561831	0.00524626
ARTHROv5_10578	ARTHROv5_10578	transposase, IS4 family	-0.172086	0.336077
ARTHROv5_10578_ARTHROv5_10579_ig	ARTHROv5_10578_ARTHROv5_10579_ig	---	-0.485087	0.0153736
ARTHROv5_10579	ARTHROv5_10579	putative RNA-directed DNA polymerase (Reverse transcriptase) with an HNH endonuclease domain (fragment)	0.029265	0.800808
ARTHROv5_10580	ARTHROv5_10580	conserved protein of unknown function	-0.093298	0.4634
ARTHROv5_10580_ARTHROv5_10581_ig	ARTHROv5_10580_ARTHROv5_10581_ig	---	0.171999	0.233583
ARTHROv5_10581	ARTHROv5_10581	conserved hypothetical protein	-0.142792	0.361692
ARTHROv5_10581_ARTHROv5_10582_ig	ARTHROv5_10581_ARTHROv5_10582_ig	---	0.397831	0.0378055
ARTHROv5_10582	ARTHROv5_10582	conserved protein of unknown function	-0.628407	0.00811778
ARTHROv5_10583	ARTHROv5_10583	putative Methylglyoxal synthase	0.0973393	0.633123
ARTHROv5_10583_ARTHROv5_10584_ig	ARTHROv5_10583_ARTHROv5_10584_ig	---	1.18604	0.00257789
ARTHROv5_10584	copA1	copper transporter	0.783829	0.00611725
ARTHROv5_10585	ARTHROv5_10585	conserved hypothetical protein	-0.267167	0.176895
ARTHROv5_10585_ARTHROv5_10586_ig	ARTHROv5_10585_ARTHROv5_10586_ig	---	0.693306	0.0153891
ARTHROv5_10586	ARTHROv5_10586	putative PBS lyase	0.0979571	0.532848
ARTHROv5_10587	ARTHROv5_10587	conserved hypothetical protein	-0.434734	0.0238394
ARTHROv5_10588	ARTHROv5_10588	putative nucleotidyltransferase	-0.477049	0.0461372
ARTHROv5_10589	ARTHROv5_10589	conserved hypothetical protein	-0.523319	0.12664
ARTHROv5_10590	ARTHROv5_10590	putative nucleotidyltransferase	-0.167629	0.374292
ARTHROv5_10591	ARTHROv5_10591	conserved hypothetical protein (fragment part2)	0.282792	0.0743351
ARTHROv5_10592	ARTHROv5_10592	conserved hypothetical protein (fragment part 1)	0.490328	0.0706608
ARTHROv5_10593	ARTHROv5_10593	putative ATPase, AAA family	1.01857	0.0404543
ARTHROv5_10594	ARTHROv5_10594	conserved protein of unknown function	1.17539	0.00135804
ARTHROv5_10594_ARTHROv5_10595_ig	ARTHROv5_10594_ARTHROv5_10595_ig	---	0.307777	0.271505
ARTHROv5_10595	ARTHROv5_10595	putative GTPase, HflX-like	0.14423	0.341129
ARTHROv5_10596	ARTHROv5_10596	conserved exported protein of unknown function	-0.106198	0.396488
ARTHROv5_10596_ARTHROv5_10597_ig	ARTHROv5_10596_ARTHROv5_10597_ig	---	0.00770211	0.956577
ARTHROv5_10597	ARTHROv5_10597	conserved protein of unknown function	-0.107786	0.37752
ARTHROv5_10598	ARTHROv5_10598	transposase, IS605 family (fragment)	0.0908677	0.498323
ARTHROv5_10599_ARTHROv5_10600_ig	ARTHROv5_10599_ARTHROv5_10600_ig	---	-0.678918	0.00477756
ARTHROv5_10600	ARTHROv5_10600	hypothetical protein	-1.20809	0.000927962
ARTHROv5_10600_ARTHROv5_10601_ig	ARTHROv5_10600_ARTHROv5_10601_ig	---	-0.990621	0.0260111
ARTHROv5_10601	ARTHROv5_10601	hypothetical protein	0.420008	0.0684786
ARTHROv5_10602	ARTHROv5_10602	conserved hypothetical protein	-0.490797	0.0206595
ARTHROv5_10602_ARTHROv5_10603_ig	ARTHROv5_10602_ARTHROv5_10603_ig	---	-0.779841	0.013638
ARTHROv5_10603	ilvD	Dihydroxy-acid dehydratase	-0.376201	0.0436338
ARTHROv5_10603_ARTHROv5_10604_ig	ARTHROv5_10603_ARTHROv5_10604_ig	---	-0.168735	0.348171
ARTHROv5_10604	ARTHROv5_10604	ComEC/Rec2-related protein	0.14161	0.410016
ARTHROv5_10605	ARTHROv5_10605	conserved membrane protein of unknown function	-0.13876	0.422174
ARTHROv5_10607	ARTHROv5_10607	Beta-Ig-H3/fasciclin	0.120988	0.56277
ARTHROv5_10607_ARTHROv5_10608_ig	ARTHROv5_10607_ARTHROv5_10608_ig	---	0.254705	0.648415
ARTHROv5_10608	ARTHROv5_10608	Adenylate/guanylate cyclase	1.76501	0.000179677
ARTHROv5_10608_ARTHROv5_10609_ig	ARTHROv5_10608_ARTHROv5_10609_ig	---	-0.606907	0.36553
ARTHROv5_10609	ARTHROv5_10609	putative chromosome segregation protein, SMC family	0.60151	0.0268344
ARTHROv5_10609_ARTHROv5_10610_ig	ARTHROv5_10609_ARTHROv5_10610_ig	---	-0.56344	0.150821
ARTHROv5_10610	ARTHROv5_10610	conserved hypothetical protein	-0.996121	0.000642907
ARTHROv5_10611	ARTHROv5_10611	conserved hypothetical protein	-0.00674177	0.986761
ARTHROv5_10611_ARTHROv5_10612_ig	ARTHROv5_10611_ARTHROv5_10612_ig	---	-0.0567154	0.764909
ARTHROv5_10612	ARTHROv5_10612	putative Fe-S oxidoreductase with radical SAM domain	-0.599107	0.0217193
ARTHROv5_10613	ARTHROv5_10613	putative Serine C-palmitoyltransferase	-0.0830683	0.632897
ARTHROv5_10614	ARTHROv5_10614	putative Acyl carrier protein	-0.337248	0.129798
ARTHROv5_10614_ARTHROv5_10615_ig	ARTHROv5_10614_ARTHROv5_10615_ig	---	-0.635783	0.119632
ARTHROv5_10615	ARTHROv5_10615	putative Long-chain-fatty-acid--CoA ligase (Acyl-CoA synthetase)	1.76584	0.00101742
ARTHROv5_10615_ARTHROv5_10616_ig	ARTHROv5_10615_ARTHROv5_10616_ig	---	0.278012	0.285635
ARTHROv5_10616	ARTHROv5_10616	putative Aspartyl/asparaginyl beta-hydroxylase	0.578799	0.0416712
ARTHROv5_10617	ARTHROv5_10617	protein of unknown function	-0.24906	0.407609
ARTHROv5_10618	ARTHROv5_10618	putative Long-chain-fatty-acid--CoA ligase (Acyl-CoA synthetase)	0.201352	0.172587
ARTHROv5_10618_ARTHROv5_10619_ig	ARTHROv5_10618_ARTHROv5_10619_ig	---	0.51869	0.059332
ARTHROv5_10619	ARTHROv5_10619	putative Permease, major facilitator superfamily	0.02868	0.841858
ARTHROv5_10620	ARTHROv5_10620	putative dTDP-4-dehydrorhamnose reductase, rmlD-like	-0.40368	0.128842
ARTHROv5_10620_ARTHROv5_10621_ig	ARTHROv5_10620_ARTHROv5_10621_ig	---	0.10001	0.595413
ARTHROv5_10621	ARTHROv5_10621	conserved protein of unknown function	-0.0871602	0.718159
ARTHROv5_10621_ARTHROv5_10622_ig	ARTHROv5_10621_ARTHROv5_10622_ig	---	-0.34375	0.746831
ARTHROv5_10622	purQ	Phosphoribosylformylglycinamidine synthase, PurQ subunit	-0.314389	0.249722
ARTHROv5_10623	purS	Phosphoribosylformylglycinamidine synthase, PurS subunit	-0.576721	0.0140712
ARTHROv5_10623_ARTHROv5_10624_ig	ARTHROv5_10623_ARTHROv5_10624_ig	---	0.140535	0.389951
ARTHROv5_10624	recR	Recombination protein RecR	1.11099	0.014575
ARTHROv5_10624_ARTHROv5_10625_ig	ARTHROv5_10624_ARTHROv5_10625_ig	---	0.758265	0.109908
ARTHROv5_10625	ARTHROv5_10625	conserved hypothetical protein	-1.13301	0.0010309
ARTHROv5_10626	ARTHROv5_10626	putative thiosulfate:cyanide sulfurtransferase (rhodanese), GlpE-like	0.18051	0.601299
ARTHROv5_10627	ARTHROv5_10627	conserved protein of unknown function	0.121819	0.651551
ARTHROv5_10627_ARTHROv5_10628_ig	ARTHROv5_10627_ARTHROv5_10628_ig	---	1.17041	0.164284
ARTHROv5_10628	ARTHROv5_10628	conserved exported protein of unknown function	1.03722	0.167005
ARTHROv5_10629_ARTHROv5_10630_ig	ARTHROv5_10629_ARTHROv5_10630_ig	---	-0.118006	0.664903
ARTHROv5_10630	ARTHROv5_10630	conserved hypothetical protein	-0.571652	0.0117182
ARTHROv5_10630_ARTHROv5_10631_ig	ARTHROv5_10630_ARTHROv5_10631_ig	---	-0.38098	0.274975
ARTHROv5_10631	ARTHROv5_10631	hypothetical protein	0.453361	0.0530915
ARTHROv5_10632	pcyA	Phycocyanobilin:ferredoxin oxidoreductase	0.175142	0.208431
ARTHROv5_10633	ARTHROv5_10633	conserved hypothetical protein	-0.356176	0.0723908
ARTHROv5_10633_ARTHROv5_10634_ig	ARTHROv5_10633_ARTHROv5_10634_ig	---	0.171303	0.547987
ARTHROv5_10634	ARTHROv5_10634	hypothetical protein	0.0319355	0.915055
ARTHROv5_10635	apcC	Phycobilisome 7.8 kDa linker polypeptide, allophycocyanin-associated, core (LC 7.8)	-1.94004	0.000303868
ARTHROv5_10635_ARTHROv5_10636_ig	ARTHROv5_10635_ARTHROv5_10636_ig	---	-1.88032	0.000151222
ARTHROv5_10636	apcB	Allophycocyanin beta subunit	-2.41444	5.71672e-05
ARTHROv5_10636_ARTHROv5_10637_ig	ARTHROv5_10636_ARTHROv5_10637_ig	---	-1.44196	0.000170407
ARTHROv5_10637	apcA	Allophycocyanin alpha subunit	-1.41573	0.000189334
ARTHROv5_10637_ARTHROv5_10638_ig	ARTHROv5_10637_ARTHROv5_10638_ig	---	-1.88064	6.94878e-05
ARTHROv5_10638	ARTHROv5_10638	putative Thioredoxin-like protein	-0.208678	0.632864
ARTHROv5_10638_ARTHROv5_10639_ig	ARTHROv5_10638_ARTHROv5_10639_ig	---	-0.906888	0.0445409
ARTHROv5_10639	ARTHROv5_10639	conserved protein of unknown function	-0.743302	0.00586196
ARTHROv5_10639_ARTHROv5_10640_ig	ARTHROv5_10639_ARTHROv5_10640_ig	---	-0.523199	0.0812036
ARTHROv5_10641	ARTHROv5_10641	transposase, IS630 family (fragment)	0.731901	0.00213372
ARTHROv5_10641_ARTHROv5_10642_ig	ARTHROv5_10641_ARTHROv5_10642_ig	---	0.0293699	0.843728
ARTHROv5_10642	rpoC2	DNA-directed RNA polymerase subunit beta'	-0.179551	0.370592
ARTHROv5_10642_ARTHROv5_10643_ig	ARTHROv5_10642_ARTHROv5_10643_ig	---	0.820735	0.00718805
ARTHROv5_10643	rpoC1	DNA-directed RNA polymerase subunit gamma	0.745134	0.00424661
ARTHROv5_10643_ARTHROv5_10644_ig	ARTHROv5_10643_ARTHROv5_10644_ig	---	0.531104	0.00874257
ARTHROv5_10644	rpoB	DNA-directed RNA polymerase subunit beta	0.265309	0.0924834
ARTHROv5_10644_ARTHROv5_10645_ig	ARTHROv5_10644_ARTHROv5_10645_ig	---	0.161156	0.37865
ARTHROv5_10645	ARTHROv5_10645	putative deoxyribonuclease, TatD-like	0.1106	0.330931
ARTHROv5_10645_ARTHROv5_10646_ig	ARTHROv5_10645_ARTHROv5_10646_ig	---	0.200825	0.208999
ARTHROv5_10646	rpsT	30S ribosomal protein S20	0.188947	0.157196
ARTHROv5_10646_ARTHROv5_10647_ig	ARTHROv5_10646_ARTHROv5_10647_ig	---	0.128213	0.578098
ARTHROv5_10647	hisD	Histidinol dehydrogenase	0.791677	0.00214509
ARTHROv5_10648	ARTHROv5_10648	Universal stress protein, UspA-like	1.22245	0.00845007
ARTHROv5_10648_ARTHROv5_10649_ig	ARTHROv5_10648_ARTHROv5_10649_ig	---	1.14603	0.0014616
ARTHROv5_10649	ARTHROv5_10649	putative two-component hybrid sensor and regulator, histidine kinase	0.694373	0.00981366
ARTHROv5_10649_ARTHROv5_10650_ig	ARTHROv5_10649_ARTHROv5_10650_ig	---	-0.404692	0.0155862
ARTHROv5_10650	ARTHROv5_10650	Putative Group II intron-encoded protein LtrA-like [Includes: Reverse-transcriptase ; RNA maturase ; HNH endonuclease] (fragment)	-0.191007	0.134244
ARTHROv5_10651	ARTHROv5_10651	HNH endonuclease	-0.584205	0.00576826
ARTHROv5_10651_ARTHROv5_10652_ig	ARTHROv5_10651_ARTHROv5_10652_ig	---	-1.48353	0.000471261
ARTHROv5_10652	ARTHROv5_10652	putative two-component hybrid sensor and regulator, histidine kinase	-1.20677	0.000865939
ARTHROv5_10652_ARTHROv5_10653_ig	ARTHROv5_10652_ARTHROv5_10653_ig	---	-1.35477	0.122106
ARTHROv5_10653	ARTHROv5_10653	putative diguanylate cyclase/phosphodiesterase (fragment)	-0.903625	0.00384256
ARTHROv5_10654	ARTHROv5_10654	putative diguanylate cyclase/phosphodiesterase (fragment)	0.494973	0.0760669
ARTHROv5_10655	ARTHROv5_10655	putative diguanylate cyclase/phosphodiesterase (fragment)	0.503755	0.0446841
ARTHROv5_10655_ARTHROv5_10656_ig	ARTHROv5_10655_ARTHROv5_10656_ig	---	0.522131	0.0236878
ARTHROv5_10656	ARTHROv5_10656	putative diguanylate cyclase/phosphodiesterase (fragment)	-0.420983	0.151092
ARTHROv5_10657	hemN	Oxygen-independent coproporphyrinogen III oxidase	-0.159108	0.316736
ARTHROv5_10657_ARTHROv5_10658_ig	ARTHROv5_10657_ARTHROv5_10658_ig	---	-2.9776	7.69446e-05
ARTHROv5_10658	ARTHROv5_10658	conserved hypothetical protein	-4.00334	4.24256e-05
ARTHROv5_10658_ARTHROv5_10659_ig	ARTHROv5_10658_ARTHROv5_10659_ig	---	-3.70103	5.46329e-05
ARTHROv5_10659	ARTHROv5_10659	putative permease, major facilitator superfamily	-1.76701	0.00144315
ARTHROv5_10659_ARTHROv5_10660_ig	ARTHROv5_10659_ARTHROv5_10660_ig	---	0.116151	0.842386
ARTHROv5_10660	ARTHROv5_10660	conserved protein of unknown function	0.823834	0.0091783
ARTHROv5_10660_ARTHROv5_10661_ig	ARTHROv5_10660_ARTHROv5_10661_ig	---	-1.30774	0.000903126
ARTHROv5_10661	ARTHROv5_10661	conserved protein of unknown function	-1.27127	0.000306245
ARTHROv5_10662	ARTHROv5_10662	Pentapeptide repeat protein	-1.28295	0.00310875
ARTHROv5_10663	bcsA	Cellulose synthase catalytic subunit [UDP-forming]	-0.463156	0.0880171
ARTHROv5_10663_ARTHROv5_10664_ig	ARTHROv5_10663_ARTHROv5_10664_ig	---	-0.811132	0.0350493
ARTHROv5_10664	ARTHROv5_10664	Peptidase C14, caspase catalytic subunit p20	-0.263543	0.0608258
ARTHROv5_10664_ARTHROv5_10665_ig	ARTHROv5_10664_ARTHROv5_10665_ig	---	0.156377	0.470361
ARTHROv5_10665	ARTHROv5_10665	conserved hypothetical protein	0.610361	0.0471012
ARTHROv5_10665_ARTHROv5_10666_ig	ARTHROv5_10665_ARTHROv5_10666_ig	---	0.702336	0.0234172
ARTHROv5_10666	gatB	Aspartyl/glutamyl-tRNA(Asn/Gln) amidotransferase subunit B (Asp/Glu-ADT subunit B)	0.0399729	0.730672
ARTHROv5_10666_ARTHROv5_10667_ig	ARTHROv5_10666_ARTHROv5_10667_ig	---	0.277001	0.0397974
ARTHROv5_10667	ARTHROv5_10667	hypothetical protein	-0.106154	0.621736
ARTHROv5_10668	ARTHROv5_10668	conserved hypothetical protein (fragment part 1)	-0.531806	0.0375864
ARTHROv5_10668_ARTHROv5_10669_ig	ARTHROv5_10668_ARTHROv5_10669_ig	---	-0.253528	0.632194
ARTHROv5_10669	ARTHROv5_10669	conserved hypothetical protein (fragment part 2)	0.334571	0.0812897
ARTHROv5_10670	ARTHROv5_10670	transposase, IS605 family (fragment)	0.118382	0.41136
ARTHROv5_10671	ARTHROv5_10671	transposase	0.200461	0.105143
ARTHROv5_10672	ARTHROv5_10672	conserved hypothetical protein (fragment part 3)	0.233696	0.601949
ARTHROv5_10672_ARTHROv5_10673_ig	ARTHROv5_10672_ARTHROv5_10673_ig	---	0.896305	0.220128
ARTHROv5_10673	ARTHROv5_10673	YD repeat protein	0.362021	0.122978
ARTHROv5_10674	ARTHROv5_10674	hypothetical protein (secreted)	0.299963	0.228502
ARTHROv5_10674_ARTHROv5_10675_ig	ARTHROv5_10674_ARTHROv5_10675_ig	---	-0.767002	0.295356
ARTHROv5_10675	dnaG	DNA primase	0.138747	0.457252
ARTHROv5_10675_ARTHROv5_10676_ig	ARTHROv5_10675_ARTHROv5_10676_ig	---	0.570316	0.141371
ARTHROv5_10676	ARTHROv5_10676	conserved hypothetical protein (membrane)	0.575704	0.0706487
ARTHROv5_10677	ARTHROv5_10677	conserved hypothetical protein	0.124749	0.567997
ARTHROv5_10678	trpF	N-(5'-phosphoribosyl)anthranilate isomerase	0.0925503	0.537715
ARTHROv5_10679	ARTHROv5_10679	conserved hypothetical protein	-0.0133192	0.922607
ARTHROv5_10679_ARTHROv5_10680_ig	ARTHROv5_10679_ARTHROv5_10680_ig	---	0.20228	0.108437
ARTHROv5_10680	ARTHROv5_10680	Multi-sensor hybrid histidine kinase	-0.408038	0.0596366
ARTHROv5_10680_ARTHROv5_10681_ig	ARTHROv5_10680_ARTHROv5_10681_ig	---	0.362406	0.0492825
ARTHROv5_10681	ARTHROv5_10681	conserved hypothetical protein	1.43962	0.000788361
ARTHROv5_10682	ARTHROv5_10682	conserved hypothetical protein	1.72665	0.00827796
ARTHROv5_10683	ARTHROv5_10683	Peptidase M16 domain protein	0.404884	0.0676346
ARTHROv5_10683_ARTHROv5_10684_ig	ARTHROv5_10683_ARTHROv5_10684_ig	---	0.228564	0.476308
ARTHROv5_10684	ARTHROv5_10684	conserved hypothetical protein	0.302711	0.180962
ARTHROv5_10685	alr	Alanine racemase	0.194127	0.217159
ARTHROv5_10685_ARTHROv5_10686_ig	ARTHROv5_10685_ARTHROv5_10686_ig	---	0.881458	0.0119073
ARTHROv5_10686	ARTHROv5_10686	HNH endonuclease:HNH nuclease	1.4445	0.000196383
ARTHROv5_10686_ARTHROv5_10687_ig	ARTHROv5_10686_ARTHROv5_10687_ig	---	0.898951	0.00518027
ARTHROv5_10687	sixA	Phosphohistidine phosphatase, SixA	1.10472	0.000983595
ARTHROv5_10687_ARTHROv5_10688_ig	ARTHROv5_10687_ARTHROv5_10688_ig	---	1.44916	0.0288633
ARTHROv5_10688	gltA	citrate synthase	2.9188	8.39573e-05
ARTHROv5_10688_ARTHROv5_10689_ig	ARTHROv5_10688_ARTHROv5_10689_ig	---	2.96957	4.24256e-05
ARTHROv5_10689	ndhA	NADH:ubiquinone oxidoreductase, membrane subunit H	-1.5581	0.000201581
ARTHROv5_10689_ARTHROv5_10690_ig	ARTHROv5_10689_ARTHROv5_10690_ig	---	-1.89594	0.000170407
ARTHROv5_10690	ndhI	NAD(P)H-quinone oxidoreductase subunit I (NAD(P)H dehydrogenase I subunit I) (NDH-1 subunit I) (NDH-I)	-1.8202	0.00064539
ARTHROv5_10691	ndhG	NAD(P)H-quinone oxidoreductase chain 6 (NAD(P)H dehydrogenase I, chain 6) (NDH-1, chain 6) (NDH-G)	-0.599082	0.00384256
ARTHROv5_10692	ARTHROv5_10692	conserved protein of unknown function	-2.17849	0.0010194
ARTHROv5_10693	ndhE	NADH:ubiquinone oxidoreductase, membrane subunit K	-1.17916	0.00531928
ARTHROv5_10693_ARTHROv5_10694_ig	ARTHROv5_10693_ARTHROv5_10694_ig	---	-0.161511	0.68649
ARTHROv5_10694	ARTHROv5_10694	putative two-component hybrid sensor and regulator, histidine kinase	0.0211182	0.905748
ARTHROv5_10695	ARTHROv5_10695	putative two-component response regulator (CheY-like receiver)	0.965107	0.00392821
ARTHROv5_10696	ARTHROv5_10696	putative Threonine dehydratase catabolic, PLP-dependent, tdcB-like	-0.025971	0.932223
ARTHROv5_10697	yknY	Uncharacterized ABC transporter ATP-binding protein YknY	0.491897	0.0116191
ARTHROv5_10697_ARTHROv5_10698_ig	ARTHROv5_10697_ARTHROv5_10698_ig	---	-0.158496	0.45969
ARTHROv5_10698_ARTHROv5_10699_ig	ARTHROv5_10698_ARTHROv5_10699_ig	---	0.561743	0.00813974
ARTHROv5_10699	ARTHROv5_10699	conserved hypothetical protein	2.07103	0.00488738
ARTHROv5_10700	ARTHROv5_10700	conserved hypothetical protein	0.62035	0.0467199
ARTHROv5_10701	ARTHROv5_10701	putative NADH dehydrogenase	0.748609	0.00295978
ARTHROv5_10701_ARTHROv5_10702_ig	ARTHROv5_10701_ARTHROv5_10702_ig	---	-0.226632	0.151092
ARTHROv5_10702	ARTHROv5_10702	conserved hypothetical protein	0.373315	0.295458
ARTHROv5_10702_ARTHROv5_10703_ig	ARTHROv5_10702_ARTHROv5_10703_ig	---	0.673206	0.332375
ARTHROv5_10703	ARTHROv5_10703	Two-component hybrid sensor and regulator	0.369578	0.0329187
ARTHROv5_10704	ARTHROv5_10704	Ser/Thr protein kinase	0.227539	0.0744283
ARTHROv5_10704_ARTHROv5_10705_ig	ARTHROv5_10704_ARTHROv5_10705_ig	---	0.0996648	0.637495
ARTHROv5_10705	ARTHROv5_10705	Ser/thr protein kinase	-0.100554	0.449412
ARTHROv5_10705_ARTHROv5_10706_ig	ARTHROv5_10705_ARTHROv5_10706_ig	---	0.162645	0.564148
ARTHROv5_10706	ARTHROv5_10706	hypothetical protein (secreted)	-0.111233	0.67679
ARTHROv5_10706_ARTHROv5_10707_ig	ARTHROv5_10706_ARTHROv5_10707_ig	---	0.186346	0.63244
ARTHROv5_10707	ARTHROv5_10707	conserved membrane protein of unknown function	-0.286427	0.0589784
ARTHROv5_10708	ARTHROv5_10708	putative Small multidrug resistance protein	0.0774809	0.84838
ARTHROv5_10708_ARTHROv5_10709_ig	ARTHROv5_10708_ARTHROv5_10709_ig	---	0.902124	0.132728
ARTHROv5_10709	serS	seryl-tRNA synthetase, also charges selenocysteinyl-tRNA with serine	0.770437	0.00863755
ARTHROv5_10709_ARTHROv5_10710_ig	ARTHROv5_10709_ARTHROv5_10710_ig	---	0.574262	0.156534
ARTHROv5_10710	ARTHROv5_10710	putative ABC-type sugar transport system, periplasmic component	0.765752	0.00233886
ARTHROv5_10711	ARTHROv5_10711	putative ABC-type sugar transport system, permease component	0.130622	0.60065
ARTHROv5_10712	ARTHROv5_10712	putative ABC-type sugar transport system, permease component	0.511613	0.0673632
ARTHROv5_10713	ARTHROv5_10713	putative ABC-type sugar transport system, ATPase component	0.870489	0.00123695
ARTHROv5_10713_ARTHROv5_10714_ig	ARTHROv5_10713_ARTHROv5_10714_ig	---	0.499105	0.416058
ARTHROv5_10714	ARTHROv5_10714	conserved hypothetical protein	0.81782	0.00283716
ARTHROv5_10714_ARTHROv5_10715_ig	ARTHROv5_10714_ARTHROv5_10715_ig	---	0.829567	0.0212409
ARTHROv5_10715	ARTHROv5_10715	putative two-component hybrid sensor and regulator, histidine kinase	0.562046	0.0905697
ARTHROv5_10716	ARTHROv5_10716	Putative two-component hybrid sensor and regulator, histidine kinase	0.283068	0.323517
ARTHROv5_10717	ARTHROv5_10717	Ser/thr protein kinase	-0.0561169	0.713148
ARTHROv5_10717_ARTHROv5_10718_ig	ARTHROv5_10717_ARTHROv5_10718_ig	---	-0.203338	0.438024
ARTHROv5_10718	ARTHROv5_10718	conserved hypothetical protein	-0.878869	0.0135761
ARTHROv5_10718_ARTHROv5_10719_ig	ARTHROv5_10718_ARTHROv5_10719_ig	---	-1.148	0.000361173
ARTHROv5_10719	rpiA	Ribose-5-phosphate isomerase A	-0.293321	0.408023
ARTHROv5_10719_ARTHROv5_10720_ig	ARTHROv5_10719_ARTHROv5_10720_ig	---	-0.029783	0.921265
ARTHROv5_10720	ARTHROv5_10720	putative oxidoreductase, aldo/keto reductase family	-0.794233	0.00323283
ARTHROv5_10721	ARTHROv5_10721	conserved hypothetical protein (membrane)	0.285952	0.162606
ARTHROv5_10722	ARTHROv5_10722	putative glycosyltransferase, group 1	0.722262	0.0919273
ARTHROv5_10723	ARTHROv5_10723	putative glycosyltransferase, group 1	-0.00702198	0.96733
ARTHROv5_10724	ARTHROv5_10724	putative glycosyltransferase, group 1	0.192464	0.256169
ARTHROv5_10725	ARTHROv5_10725	putative glycosyltransferase, group 1	-0.306414	0.113597
ARTHROv5_10726	ARTHROv5_10726	conserved hypothetical protein (membrane)	-0.0477396	0.780157
ARTHROv5_10727	ARTHROv5_10727	putative glycosyltransferase, family 2	0.0255965	0.890237
ARTHROv5_10727_ARTHROv5_10728_ig	ARTHROv5_10727_ARTHROv5_10728_ig	---	-1.34526	0.297911
ARTHROv5_10728	ARTHROv5_10728	putative glycosyltransferase, group 1	0.102266	0.573007
ARTHROv5_10729	ARTHROv5_10729	putative methyltransferase, type 11	-0.0107315	0.964515
ARTHROv5_10729_ARTHROv5_10730_ig	ARTHROv5_10729_ARTHROv5_10730_ig	---	0.0362786	0.821582
ARTHROv5_10730	ARTHROv5_10730	putative glycosyltransferase, group 1	-0.200914	0.168933
ARTHROv5_10731	ARTHROv5_10731	conserved hypothetical protein	-0.0313431	0.858219
ARTHROv5_10732	ARTHROv5_10732	putative glycosyltransferase, group 1	0.307952	0.208508
ARTHROv5_10733	ARTHROv5_10733	ABC transporter related	0.105666	0.638525
ARTHROv5_10733_ARTHROv5_10734_ig	ARTHROv5_10733_ARTHROv5_10734_ig	---	0.476958	0.314113
ARTHROv5_10734	ARTHROv5_10734	Outer membrane adhesin like proteiin (fragment)	0.55539	0.0213853
ARTHROv5_10734_ARTHROv5_10735_ig	ARTHROv5_10734_ARTHROv5_10735_ig	---	0.459806	0.0699939
ARTHROv5_10735	ARTHROv5_10735	putative glycosyltransferase, family 2	-0.718212	0.00983773
ARTHROv5_10736	ARTHROv5_10736	UDP-N-acetyl-D-mannosaminuronic acid transferase; Glycosyl transferase, WecB/TagA/CpsF family	-0.398887	0.0213853
ARTHROv5_10736_ARTHROv5_10737_ig	ARTHROv5_10736_ARTHROv5_10737_ig	---	0.174198	0.393314
ARTHROv5_10737	ARTHROv5_10737	putative C-methyltransferase protein	-0.088837	0.733935
ARTHROv5_10738	nadC	quinolinate phosphoribosyltransferase (nicotinate-nucleotide pyrophosphorylase)	0.173677	0.342034
ARTHROv5_10739	ygjQ	putative thioredoxin-like	0.198072	0.210265
ARTHROv5_10739_ARTHROv5_10740_ig	ARTHROv5_10739_ARTHROv5_10740_ig	---	0.39705	0.0278492
ARTHROv5_10740	ARTHROv5_10740	HNH endonuclease	-0.238974	0.0669742
ARTHROv5_10740_ARTHROv5_10741_ig	ARTHROv5_10740_ARTHROv5_10741_ig	---	-0.117387	0.537154
ARTHROv5_10741	ARTHROv5_10741	putative permease, Auxin efflux carrier family	1.0855	0.0796152
ARTHROv5_10741_ARTHROv5_10742_ig	ARTHROv5_10741_ARTHROv5_10742_ig	---	0.837599	0.00340686
ARTHROv5_10742	yniA	putative phosphotransferase/kinase	0.196367	0.214275
ARTHROv5_10743	ARTHROv5_10743	conserved hypothetical protein	-0.519315	0.0190132
ARTHROv5_10744	ARTHROv5_10744	putative Esterase/lipase	-0.869987	0.00222195
ARTHROv5_10745	ARTHROv5_10745	putative Methyltransferase type 11	-0.619256	0.00828902
ARTHROv5_10745_ARTHROv5_10746_ig	ARTHROv5_10745_ARTHROv5_10746_ig	---	-0.177463	0.731391
ARTHROv5_10746	ARTHROv5_10746	putative Copper chaperone	0.604363	0.0142596
ARTHROv5_10747	oppF	oligopeptide transporter subunit ; ATP-binding component of ABC superfamily	0.638994	0.0964507
ARTHROv5_10748	oppD	oligopeptide transporter subunit ; ATP-binding component of ABC superfamily	-0.152253	0.686367
ARTHROv5_10749	ARTHROv5_10749	conserved protein of unknown function	-0.498496	0.0325975
ARTHROv5_10750	ARTHROv5_10750	Alkyl hydroperoxide reductase/ Thiol specific antioxidant/ Mal allergen	-0.804656	0.0283167
ARTHROv5_10750_ARTHROv5_10751_ig	ARTHROv5_10750_ARTHROv5_10751_ig	---	-0.516346	0.319795
ARTHROv5_10751	ARTHROv5_10751	Diguanylate cyclase/phosphodiesterase	0.638551	0.00981366
ARTHROv5_10751_ARTHROv5_10752_ig	ARTHROv5_10751_ARTHROv5_10752_ig	---	-0.611696	0.446687
ARTHROv5_10752	dapB	Dihydrodipicolinate reductase	-0.536207	0.00634434
ARTHROv5_10753	ARTHROv5_10753	conserved protein of unknown function	-0.279782	0.193216
ARTHROv5_10754	cobH2	Precorrin-8X methylmutase	0.420818	0.0648452
ARTHROv5_10754_ARTHROv5_10755_ig	ARTHROv5_10754_ARTHROv5_10755_ig	---	0.512012	0.158753
ARTHROv5_10755	ARTHROv5_10755	conserved protein of unknown function	0.482134	0.129442
ARTHROv5_10756	ARTHROv5_10756	Transcriptional regulator,heavy-metal dependent, MerR family	0.513441	0.114919
ARTHROv5_10757	ARTHROv5_10757	putative Redox-active disulfide protein 2	0.0892691	0.54549
ARTHROv5_10757_ARTHROv5_10758_ig	ARTHROv5_10757_ARTHROv5_10758_ig	---	0.936349	0.0731695
ARTHROv5_10758	ARTHROv5_10758	putative permease	-0.249924	0.175391
ARTHROv5_10759	mtnB	methylthioribulose-1-phosphate dehydratase (MTRu-1-P dehydratase)	-0.508569	0.0406503
ARTHROv5_10760	mtnW	2,3-diketo-5-methylthiopentyl-1-phosphate enolase (DK- MTP-1-P enolase)	-0.463355	0.0152944
ARTHROv5_10761	uvrA	ATPase and DNA damage recognition protein of nucleotide excision repair excinuclease UvrABC	0.0407121	0.792732
ARTHROv5_10761_ARTHROv5_10762_ig	ARTHROv5_10761_ARTHROv5_10762_ig	---	-0.0242306	0.939114
ARTHROv5_10762	ARTHROv5_10762	conserved hypothetical protein	-0.310055	0.154802
ARTHROv5_10762_ARTHROv5_10763_ig	ARTHROv5_10762_ARTHROv5_10763_ig	---	0.6954	0.0449312
ARTHROv5_10763	ARTHROv5_10763	putative translation factor, Sua5/YciO/YrdC/YwlC family	0.488686	0.0443014
ARTHROv5_10764	ARTHROv5_10764	conserved hypothetical protein	-0.0691076	0.686066
ARTHROv5_10764_ARTHROv5_10765_ig	ARTHROv5_10764_ARTHROv5_10765_ig	---	0.230767	0.186744
ARTHROv5_10765	ARTHROv5_10765	conserved hypothetical protein	0.73262	0.00510714
ARTHROv5_10765_ARTHROv5_10766_ig	ARTHROv5_10765_ARTHROv5_10766_ig	---	0.491551	0.113495
ARTHROv5_10766	ARTHROv5_10766	hypothetical protein	0.349469	0.322228
ARTHROv5_10767	ARTHROv5_10767	protein of unknown function	-0.737382	0.490547
ARTHROv5_10768	ARTHROv5_10768	conserved hypothetical protein	0.176821	0.226295
ARTHROv5_10768_ARTHROv5_10769_ig	ARTHROv5_10768_ARTHROv5_10769_ig	---	1.39535	0.0165393
ARTHROv5_10769	valS	valyl-tRNA synthetase	0.724228	0.00312506
ARTHROv5_10769_ARTHROv5_10770_ig	ARTHROv5_10769_ARTHROv5_10770_ig	---	-0.299512	0.419018
ARTHROv5_10770	hemA	glutamyl tRNA reductase (GluTR)	-2.04826	0.000316187
ARTHROv5_10770_ARTHROv5_10771_ig	ARTHROv5_10770_ARTHROv5_10771_ig	---	-1.77522	0.00226707
ARTHROv5_10771	glpX	D-fructose 1,6-bisphosphatase class II	-1.38081	0.00135838
ARTHROv5_10771_ARTHROv5_10772_ig	ARTHROv5_10771_ARTHROv5_10772_ig	---	-0.977643	0.0119644
ARTHROv5_10772	ARTHROv5_10772	transposase, IS605 family (fragment)	-0.334738	0.343312
ARTHROv5_10772_ARTHROv5_10773_ig	ARTHROv5_10772_ARTHROv5_10773_ig	---	-1.15137	0.0086785
ARTHROv5_10773	ARTHROv5_10773	conserved protein of unknown function	0.0993471	0.475836
ARTHROv5_10773_ARTHROv5_10774_ig	ARTHROv5_10773_ARTHROv5_10774_ig	---	0.216046	0.197635
ARTHROv5_10774	ARTHROv5_10774	conserved protein of unknown function	0.0387726	0.80239
ARTHROv5_10774_ARTHROv5_10775_ig	ARTHROv5_10774_ARTHROv5_10775_ig	---	0.16183	0.401635
ARTHROv5_10775	ARTHROv5_10775	Putative Group II intron-encoded protein LtrA-like [Includes: Reverse-transcriptase ; RNA maturase ; HNH endonuclease] (fragment)	-0.204402	0.162079
ARTHROv5_10776	ARTHROv5_10776	Group II intron maturase-specific domain protein	0.158547	0.295772
ARTHROv5_10777	ARTHROv5_10777	protein of unknown function	0.0113269	0.925654
ARTHROv5_10777_ARTHROv5_10778_ig	ARTHROv5_10777_ARTHROv5_10778_ig	---	0.0453238	0.71248
ARTHROv5_10778	ARTHROv5_10778	conserved protein of unknown function	0.158097	0.345177
ARTHROv5_10779	ARTHROv5_10779	protein of unknown function	-0.302896	0.116418
ARTHROv5_10779_ARTHROv5_10780_ig	ARTHROv5_10779_ARTHROv5_10780_ig	---	-0.778064	0.00274211
ARTHROv5_10780	dapL	LL-diaminopimelate aminotransferase	-0.602889	0.00554044
ARTHROv5_10781	ARTHROv5_10781	protein of unknown function	0.648758	0.306643
ARTHROv5_10781_ARTHROv5_10782_ig	ARTHROv5_10781_ARTHROv5_10782_ig	---	-0.507348	0.0257062
ARTHROv5_10782	ARTHROv5_10782	conserved exported protein of unknown function	-0.552224	0.00600658
ARTHROv5_10782_ARTHROv5_misc_RNA_77_ig	ARTHROv5_10782_ARTHROv5_misc_RNA_77_ig	---	-0.992358	0.00280488
ARTHROv5_10784	ARTHROv5_10784	conserved protein of unknown function	-0.529333	0.0286998
ARTHROv5_10784_ARTHROv5_16s_rRNA_1_ig	ARTHROv5_10784_ARTHROv5_16s_rRNA_1_ig	---	0.77808	0.00285239
ARTHROv5_10785	ARTHROv5_10785	RDD domain containing protein (fragment)	-1.01838	0.00507803
ARTHROv5_10785_ARTHROv5_10786_ig	ARTHROv5_10785_ARTHROv5_10786_ig	---	-0.764471	0.00260035
ARTHROv5_10786	rpsR	30S ribosomal protein S18	-1.21592	0.000494469
ARTHROv5_10787	ARTHROv5_10787	putative enzyme	-0.332453	0.0363147
ARTHROv5_10788	ARTHROv5_10788	putative ABC transporter (substrate-binding protein)	-1.29697	0.00274664
ARTHROv5_10788_ARTHROv5_10789_ig	ARTHROv5_10788_ARTHROv5_10789_ig	---	0.188286	0.514372
ARTHROv5_10789	ARTHROv5_10789	putative ABC transporter (ATP-binding protein)	0.0989889	0.686367
ARTHROv5_10789_ARTHROv5_10790_ig	ARTHROv5_10789_ARTHROv5_10790_ig	---	0.102681	0.864821
ARTHROv5_10790	ARTHROv5_10790	putative ABC transporter (permease protein)	-0.735423	0.0378052
ARTHROv5_10791	ARTHROv5_10791	putative Histone acetyltransferase, GNAT family	-1.09664	0.0949641
ARTHROv5_10791_ARTHROv5_10792_ig	ARTHROv5_10791_ARTHROv5_10792_ig	---	0.000279811	0.998483
ARTHROv5_10792	ARTHROv5_10792	putative Glycerol-3-phosphate dehydrogenase	-0.821774	0.00688776
ARTHROv5_10792_ARTHROv5_10793_ig	ARTHROv5_10792_ARTHROv5_10793_ig	---	-1.26034	0.00416911
ARTHROv5_10793	HcaD	Pyridine nucleotide-disulphide oxidoreductase, class-II	-1.57648	0.00372436
ARTHROv5_10794	ARTHROv5_10794	conserved hypothetical protein	-0.258238	0.247874
ARTHROv5_10794_ARTHROv5_10795_ig	ARTHROv5_10794_ARTHROv5_10795_ig	---	0.295679	0.142561
ARTHROv5_10795	cheY2	CheY chemotaxis response regulator; chemotaxis regulator transmitting signal to flagellar motor component	0.519604	0.0124512
ARTHROv5_10796	cheC2	CheC, inhibitor of MCP methylation	-0.0101552	0.955957
ARTHROv5_10797	ARTHROv5_10797	putative two-component hybrid sensor and regulator, histidine kinase	0.158436	0.451687
ARTHROv5_10797_ARTHROv5_10798_ig	ARTHROv5_10797_ARTHROv5_10798_ig	---	-0.0911424	0.707765
ARTHROv5_10798	ARTHROv5_10798	conserved hypothetical protein	0.381968	0.0150666
ARTHROv5_10798_ARTHROv5_10799_ig	ARTHROv5_10798_ARTHROv5_10799_ig	---	0.425057	0.0184308
ARTHROv5_10799	rpsF	30S ribosomal protein S6	0.355108	0.0676443
ARTHROv5_10799_ARTHROv5_10800_ig	ARTHROv5_10799_ARTHROv5_10800_ig	---	0.340366	0.262278
ARTHROv5_10800	ARTHROv5_10800	hypothetical protein	0.0267551	0.955347
ARTHROv5_10800_ARTHROv5_10801_ig	ARTHROv5_10800_ARTHROv5_10801_ig	---	0.0982038	0.844184
ARTHROv5_10801	ARTHROv5_10801	Glycosyltransferase, family 2	-1.44963	0.00245396
ARTHROv5_10802	ARTHROv5_10802	conserved hypothetical protein	0.250198	0.256192
ARTHROv5_10802_ARTHROv5_10803_ig	ARTHROv5_10802_ARTHROv5_10803_ig	---	0.0528752	0.762491
ARTHROv5_10803	ARTHROv5_10803	conserved hypothetical protein	-0.0795502	0.637946
ARTHROv5_10803_ARTHROv5_10804_ig	ARTHROv5_10803_ARTHROv5_10804_ig	---	-0.453242	0.147971
ARTHROv5_10804	nusA	transcription termination/antitermination, L factor (N utilization substance protein A)	-0.604389	0.00399721
ARTHROv5_10804_ARTHROv5_10805_ig	ARTHROv5_10804_ARTHROv5_10805_ig	---	0.481275	0.0468924
ARTHROv5_10805	ARTHROv5_10805	transposase, IS605 family, OrfB	0.167766	0.165036
ARTHROv5_10806	ARTHROv5_10806	conserved protein of unknown function	-0.364018	0.0931084
ARTHROv5_10806_ARTHROv5_10807_ig	ARTHROv5_10806_ARTHROv5_10807_ig	---	0.166751	0.226312
ARTHROv5_10807	ARTHROv5_10807	conserved hypothetical protein	0.0617066	0.647339
ARTHROv5_10807_ARTHROv5_10808_ig	ARTHROv5_10807_ARTHROv5_10808_ig	---	-0.0281417	0.843728
ARTHROv5_10808	ARTHROv5_10808	conserved protein of unknown function	0.0892021	0.530718
ARTHROv5_10808_ARTHROv5_10809_ig	ARTHROv5_10808_ARTHROv5_10809_ig	---	0.173401	0.255912
ARTHROv5_10809	ARTHROv5_10809	transposase (fragment)	-0.0915217	0.473849
ARTHROv5_10809_ARTHROv5_10810_ig	ARTHROv5_10809_ARTHROv5_10810_ig	---	-1.1549	0.0012841
ARTHROv5_10810	ARTHROv5_10810	Translation initiation factor IF-2 (fragment)	-0.2488	0.142262
ARTHROv5_10811	ARTHROv5_10811	Translation initiation factor IF-2 (fragment)	0.637299	0.0530902
ARTHROv5_10811_ARTHROv5_10812_ig	ARTHROv5_10811_ARTHROv5_10812_ig	---	0.4149	0.561795
ARTHROv5_10812	dapL	LL-diaminopimelate aminotransferase 1	-0.684369	0.0029056
ARTHROv5_10812_ARTHROv5_10813_ig	ARTHROv5_10812_ARTHROv5_10813_ig	---	-0.631149	0.166683
ARTHROv5_10813	ARTHROv5_10813	hypothetical protein (membrane)	-0.646477	0.0282097
ARTHROv5_10813_ARTHROv5_10814_ig	ARTHROv5_10813_ARTHROv5_10814_ig	---	-0.500901	0.0259726
ARTHROv5_10814	hisZ	ATP phosphoribosyltransferase regulatory subunit	-0.832485	0.00143578
ARTHROv5_10814_ARTHROv5_10815_ig	ARTHROv5_10814_ARTHROv5_10815_ig	---	-0.669143	0.0280477
ARTHROv5_10815	ARTHROv5_10815	conserved protein of unknown function	-0.476546	0.00596667
ARTHROv5_10815_ARTHROv5_10816_ig	ARTHROv5_10815_ARTHROv5_10816_ig	---	-0.336089	0.0402993
ARTHROv5_10816	suhB	inositol monophosphatase	-0.605778	0.00744298
ARTHROv5_10816_ARTHROv5_10817_ig	ARTHROv5_10816_ARTHROv5_10817_ig	---	0.0360046	0.785489
ARTHROv5_10817	ARTHROv5_10817	putative Micrococcal nuclease, SNase-like	-0.450947	0.014408
ARTHROv5_10818	ARTHROv5_10818	ferredoxin-like	-1.03367	0.00233888
ARTHROv5_10818_ARTHROv5_10819_ig	ARTHROv5_10818_ARTHROv5_10819_ig	---	-3.9743	9.79266e-05
ARTHROv5_10819	gdh	Glutamate dehydrogenase	-6.24574	5.46329e-05
ARTHROv5_10819_ARTHROv5_10820_ig	ARTHROv5_10819_ARTHROv5_10820_ig	---	-2.49493	0.000617733
ARTHROv5_10820	ARTHROv5_10820	putative TRAP dicarboxylate transporter, DctP subunit	-0.205387	0.287153
ARTHROv5_10821	ushA	Protein ushA precursor [Includes: UDP-sugar hydrolase (UDP-sugar pyrophosphatase) (UDP-sugar diphosphatase); 5'-nucleotidase (5'-NT)]	-0.93246	0.00957871
ARTHROv5_10822	ARTHROv5_10822	conserved hypothetical protein	-0.668078	0.0119158
ARTHROv5_10822_ARTHROv5_10823_ig	ARTHROv5_10822_ARTHROv5_10823_ig	---	-0.894208	0.0135951
ARTHROv5_10823	ARTHROv5_10823	conserved protein of unknown function	-0.117873	0.756016
ARTHROv5_10823_ARTHROv5_10824_ig	ARTHROv5_10823_ARTHROv5_10824_ig	---	-0.237853	0.242377
ARTHROv5_10824	ARTHROv5_10824	conserved hypothetical protein	-0.210839	0.148689
ARTHROv5_10824_ARTHROv5_10825_ig	ARTHROv5_10824_ARTHROv5_10825_ig	---	-0.167056	0.169828
ARTHROv5_10825	rbp2	Glycine-rich RNA-binding protein, rbp-like	-0.214336	0.127029
ARTHROv5_10825_ARTHROv5_tRNA40_ig	ARTHROv5_10825_ARTHROv5_tRNA40_ig	---	-0.710737	0.00784542
ARTHROv5_10826	ARTHROv5_10826	putative Zn-dependent protease	-0.383978	0.0138592
ARTHROv5_10827	secG	Preprotein translocase, SecG subunit	-0.455881	0.0107401
ARTHROv5_10828	ARTHROv5_10828	RNA-directed DNA polymerase (Reverse transcriptase)	-0.319152	0.0258476
ARTHROv5_10828_ARTHROv5_10829_ig	ARTHROv5_10828_ARTHROv5_10829_ig	---	-0.101525	0.478204
ARTHROv5_10829	ARTHROv5_10829	conserved protein of unknown function	-0.0340249	0.815579
ARTHROv5_10830	ARTHROv5_10830	Permease of the major facilitator superfamily	-0.058598	0.692546
ARTHROv5_10831	ARTHROv5_10831	conserved hypothetical protein (membrane)	-0.202221	0.455076
ARTHROv5_10831_ARTHROv5_10832_ig	ARTHROv5_10831_ARTHROv5_10832_ig	---	-0.566333	0.0634076
ARTHROv5_10832	ARTHROv5_10832	conserved hypothetical protein	-0.430908	0.0633156
ARTHROv5_10832_ARTHROv5_10833_ig	ARTHROv5_10832_ARTHROv5_10833_ig	---	-0.165808	0.712095
ARTHROv5_10833	bcp4	Bacterioferritin comigratory protein	-0.00630221	0.989892
ARTHROv5_10833_ARTHROv5_10834_ig	ARTHROv5_10833_ARTHROv5_10834_ig	---	-0.624813	0.354387
ARTHROv5_10834	ARTHROv5_10834	conserved hypothetical protein	0.446593	0.0177323
ARTHROv5_10835	cobQ	Cobyric acid synthase	-0.0264424	0.860698
ARTHROv5_10835_ARTHROv5_10836_ig	ARTHROv5_10835_ARTHROv5_10836_ig	---	-0.140921	0.747545
ARTHROv5_10836	ARTHROv5_10836	Putative biopolymer transport protein, MotA/TolQ/ExbB-like	-0.463483	0.00608607
ARTHROv5_10836_ARTHROv5_10837_ig	ARTHROv5_10836_ARTHROv5_10837_ig	---	0.0418765	0.769072
ARTHROv5_10837	ARTHROv5_10837	Putative biopolymer transport protein, ExbD/TolR -like	0.118255	0.33201
ARTHROv5_10837_ARTHROv5_10838_ig	ARTHROv5_10837_ARTHROv5_10838_ig	---	0.582188	0.484747
ARTHROv5_10838	ARTHROv5_10838	conserved protein of unknown function	0.718476	0.0241674
ARTHROv5_10839	ARTHROv5_10839	putative lactoylglutathione lyase	0.137108	0.322756
ARTHROv5_10839_ARTHROv5_10840_ig	ARTHROv5_10839_ARTHROv5_10840_ig	---	0.25575	0.151464
ARTHROv5_10840	ARTHROv5_10840	putative metalloendopeptidase, M16 family	1.26371	0.0026298
ARTHROv5_10840_ARTHROv5_10841_ig	ARTHROv5_10840_ARTHROv5_10841_ig	---	0.469982	0.16687
ARTHROv5_10841	ARTHROv5_10841	conserved hypothetical protein	-0.671971	0.0111475
ARTHROv5_10841_ARTHROv5_10842_ig	ARTHROv5_10841_ARTHROv5_10842_ig	---	-1.05425	0.00386389
ARTHROv5_10842	ARTHROv5_10842	conserved hypothetical protein	-0.658553	0.00809754
ARTHROv5_10843	ARTHROv5_10843	conserved hypothetical protein, CofD related	0.101825	0.446687
ARTHROv5_10844	ARTHROv5_10844	protein of unknown function	0.913904	0.0613815
ARTHROv5_10845	ARTHROv5_10845	putative ABC transporter (ATP-binding protein)	0.807205	0.00349251
ARTHROv5_10845_ARTHROv5_10846_ig	ARTHROv5_10845_ARTHROv5_10846_ig	---	2.73785	0.000611752
ARTHROv5_10846	ARTHROv5_10846	putative ABC-type transport system involved in resistance to organic solvents, periplasmic component	2.17489	0.000196307
ARTHROv5_10847	gatA	Glutamyl-tRNA(Gln) amidotransferase subunit A (Glu-ADT subunit A)	-0.592783	0.0161439
ARTHROv5_10847_ARTHROv5_10848_ig	ARTHROv5_10847_ARTHROv5_10848_ig	---	0.842925	0.145628
ARTHROv5_10848	ARTHROv5_10848	transposase, IS630 family (fragment)	0.777991	0.00390293
ARTHROv5_10849	ARTHROv5_10849	conserved hypothetical protein (secreted)(fragment)	0.31186	0.318146
ARTHROv5_10849_ARTHROv5_10850_ig	ARTHROv5_10849_ARTHROv5_10850_ig	---	0.187636	0.762378
ARTHROv5_10850	ARTHROv5_10850	putative Trypsin-like serine protease, S1 family	-0.252176	0.555795
ARTHROv5_10850_ARTHROv5_10851_ig	ARTHROv5_10850_ARTHROv5_10851_ig	---	0.241896	0.572838
ARTHROv5_10851	ARTHROv5_10851	putative metalloendopeptidase, M23B subfamily	0.429428	0.0567334
ARTHROv5_10851_ARTHROv5_10852_ig	ARTHROv5_10851_ARTHROv5_10852_ig	---	-1.28125	0.0835262
ARTHROv5_10852	psbP	Photosystem II oxygen-evolving complex 23K protein	-0.838286	0.0050662
ARTHROv5_10853	ARTHROv5_10853	putative septum formation inhibitor, Maf-like	-1.21881	0.00202552
ARTHROv5_10854	ubiA	4-hydroxybenzoate octaprenyltransferase	-0.587572	0.00974839
ARTHROv5_10854_ARTHROv5_10855_ig	ARTHROv5_10854_ARTHROv5_10855_ig	---	0.00329341	0.992069
ARTHROv5_10855	ARTHROv5_10855	Type II Site-specific DNA-methyltransferase (cytosine-N(4)-specific)	0.155826	0.641314
ARTHROv5_10856	ARTHROv5_10856	protein of unknown function	0.334751	0.247304
ARTHROv5_10857	ARTHROv5_10857	hypothetical protein	-0.147384	0.584739
ARTHROv5_10858	ARTHROv5_10858	conserved hypothetical protein (secreted)	0.205382	0.228981
ARTHROv5_10858_ARTHROv5_10859_ig	ARTHROv5_10858_ARTHROv5_10859_ig	---	-0.334875	0.251249
ARTHROv5_10859	ARTHROv5_10859	conserved hypothetical protein	-0.708636	0.00726967
ARTHROv5_10860	ARTHROv5_10860	putative cell wall-associated hydrolase (invasion-associated protein), NLPC/P60 family	-0.41512	0.110578
ARTHROv5_10861	ARTHROv5_10861	conserved hypothetical protein (membrane)	-0.7203	0.260161
ARTHROv5_10861_ARTHROv5_10862_ig	ARTHROv5_10861_ARTHROv5_10862_ig	---	0.863739	0.187315
ARTHROv5_10862	ARTHROv5_10862	putative signal transduction diguanylate kinase	0.53721	0.0218483
ARTHROv5_10862_ARTHROv5_10863_ig	ARTHROv5_10862_ARTHROv5_10863_ig	---	0.620366	0.0330825
ARTHROv5_10863	ARTHROv5_10863	conserved protein of unknown function	0.488034	0.108963
ARTHROv5_10863_ARTHROv5_10864_ig	ARTHROv5_10863_ARTHROv5_10864_ig	---	0.156989	0.230078
ARTHROv5_10864	ARTHROv5_10864	transposase, IS630 family (fragment)	0.310183	0.0316523
ARTHROv5_10865	ARTHROv5_10865	transposase, IS630 family (fragment)	0.384194	0.0621583
ARTHROv5_10866	ARTHROv5_10866	conserved protein of unknown function	0.314279	0.12584
ARTHROv5_10867	ARTHROv5_10867	transposase	0.40224	0.0179047
ARTHROv5_10868	ARTHROv5_10868	conserved membrane protein of unknown function	0.43881	0.0129775
ARTHROv5_10869	ARTHROv5_10869	Arsenical pump-driving ATPase-like protein	-0.233148	0.203466
ARTHROv5_10870	ARTHROv5_10870	putative Vesicle-fusing ATPase	0.295493	0.0421811
ARTHROv5_10870_ARTHROv5_10871_ig	ARTHROv5_10870_ARTHROv5_10871_ig	---	0.216986	0.654309
ARTHROv5_10871	ARTHROv5_10871	transposase, IS605 family, OrfA	-0.522963	0.102894
ARTHROv5_10872	ARTHROv5_10872	protein of unknown function	0.303585	0.676722
ARTHROv5_10872_ARTHROv5_10873_ig	ARTHROv5_10872_ARTHROv5_10873_ig	---	0.559373	0.0266754
ARTHROv5_10873	ARTHROv5_10873	transposase, IS605 family, OrfB (fragment part 1)	0.794955	0.010308
ARTHROv5_10873_ARTHROv5_10874_ig	ARTHROv5_10873_ARTHROv5_10874_ig	---	0.234749	0.274523
ARTHROv5_10874	ARTHROv5_10874	transposase, IS605 family, OrfB (fragment part 2)	-0.222063	0.0732636
ARTHROv5_10874_ARTHROv5_10875_ig	ARTHROv5_10874_ARTHROv5_10875_ig	---	-0.0706132	0.72416
ARTHROv5_10875	ARTHROv5_10875	hypothetical protein	-0.415916	0.0677506
ARTHROv5_10879	ARTHROv5_10879	conserved protein of unknown function	0.132793	0.299905
ARTHROv5_10881	ARTHROv5_10881	transposase (fragment)	0.370301	0.126133
ARTHROv5_10882	ARTHROv5_10882	transposase	0.174553	0.40229
ARTHROv5_10882_ARTHROv5_10883_ig	ARTHROv5_10882_ARTHROv5_10883_ig	---	0.0182216	0.9361
ARTHROv5_10883	cheA3	CheA Signal Transduction Histidine Kinases (STHK); Two-component hybrid sensor and regulator	0.114533	0.610083
ARTHROv5_10883_ARTHROv5_10884_ig	ARTHROv5_10883_ARTHROv5_10884_ig	---	-0.71627	0.0139128
ARTHROv5_10884	ARTHROv5_10884	methyl-accepting chemotaxis protein, sensory transducer	0.129651	0.323681
ARTHROv5_10884_ARTHROv5_10885_ig	ARTHROv5_10884_ARTHROv5_10885_ig	---	-0.160197	0.248409
ARTHROv5_10885	cheW3	CheW chemotaxis protein	-0.00809194	0.94805
ARTHROv5_10886	cheY4	Response regulator receiver domain protein (CheY); chemotaxis protein	0.08097	0.526444
ARTHROv5_10886_ARTHROv5_10887_ig	ARTHROv5_10886_ARTHROv5_10887_ig	---	0.52138	0.034901
ARTHROv5_10887	cheY1	CheY Response regulator receiver domain protein, two-component system, regulatory protein	0.217521	0.110869
ARTHROv5_10887_ARTHROv5_10888_ig	ARTHROv5_10887_ARTHROv5_10888_ig	---	-0.609109	0.0638853
ARTHROv5_10888	ARTHROv5_10888	DNA or RNA helicase of superfamily II	-0.718555	0.00579177
ARTHROv5_10888_ARTHROv5_10889_ig	ARTHROv5_10888_ARTHROv5_10889_ig	---	0.462911	0.0753372
ARTHROv5_10889	ARTHROv5_10889	conserved protein of unknown function	0.514889	0.0129046
ARTHROv5_10890	ARTHROv5_10890	conserved protein of unknown function	-0.132516	0.594308
ARTHROv5_10890_ARTHROv5_10891_ig	ARTHROv5_10890_ARTHROv5_10891_ig	---	-0.102653	0.722201
ARTHROv5_10891	ARTHROv5_10891	conserved protein of unknown function	-0.70699	0.142044
ARTHROv5_10892	faxP5	unknown phage of the genus Arthrospira, protein P	-0.175192	0.633124
ARTHROv5_10893	ARTHROv5_10893	conserved protein of unknown function	0.158579	0.2623
ARTHROv5_10894	ARTHROv5_10894	conserved protein of unknown function	-0.285216	0.187797
ARTHROv5_10895	ARTHROv5_10895	conserved protein of unknown function	-1.42185	0.0192008
ARTHROv5_10897	ARTHROv5_10897	protein of unknown function	-0.90818	0.00711535
ARTHROv5_10898	ARTHROv5_10898	protein of unknown function	-1.00503	0.0100013
ARTHROv5_10899	ARTHROv5_10899	conserved protein of unknown function	-0.673802	0.152907
ARTHROv5_10899_ARTHROv5_10900_ig	ARTHROv5_10899_ARTHROv5_10900_ig	---	-0.553658	0.371232
ARTHROv5_10900	faxJ2	unknown phage of the genus Arthrospira, protein J	-0.477919	0.187285
ARTHROv5_10901	ARTHROv5_10901	protein of unknown function	-0.900186	0.0206255
ARTHROv5_10902	ARTHROv5_10902	conserved protein of unknown function	-0.71058	0.0133978
ARTHROv5_10908	ARTHROv5_10908	conserved protein of unknown function	-0.470939	0.267446
ARTHROv5_10909	ARTHROv5_10909	conserved protein of unknown function	-0.30755	0.0927079
ARTHROv5_10909_ARTHROv5_10910_ig	ARTHROv5_10909_ARTHROv5_10910_ig	---	0.0171417	0.967042
ARTHROv5_10910	ARTHROv5_10910	conserved protein of unknown function	-0.16204	0.784795
ARTHROv5_10911	ARTHROv5_10911	conserved protein of unknown function	0.762235	0.00364967
ARTHROv5_10912_ARTHROv5_10913_ig	ARTHROv5_10912_ARTHROv5_10913_ig	---	0.0332561	0.828333
ARTHROv5_10913	ARTHROv5_10913	conserved protein of unknown function	-0.0683104	0.645511
ARTHROv5_10913_ARTHROv5_10914_ig	ARTHROv5_10913_ARTHROv5_10914_ig	---	1.11689	0.00175853
ARTHROv5_10914	ARTHROv5_10914	conserved protein of unknown function	0.167491	0.229963
ARTHROv5_10914_ARTHROv5_10915_ig	ARTHROv5_10914_ARTHROv5_10915_ig	---	-0.155942	0.664391
ARTHROv5_10915	ARTHROv5_10915	putative tRNA nucleotidyltransferase	-0.484926	0.0132521
ARTHROv5_10916	ARTHROv5_10916	hypothetical protein	-0.17568	0.689493
ARTHROv5_10917	ARTHROv5_10917	Diguanylate kinase	0.250692	0.158732
ARTHROv5_10917_ARTHROv5_10918_ig	ARTHROv5_10917_ARTHROv5_10918_ig	---	-0.512724	0.0122367
ARTHROv5_10918	ARTHROv5_10918	conserved hypothetical protein	0.123326	0.434552
ARTHROv5_10919	ARTHROv5_10919	Ser/thr protein kinase	-0.567876	0.0136394
ARTHROv5_10920	ARTHROv5_10920	protein of unknown function	1.98586	0.00640231
ARTHROv5_10920_ARTHROv5_10921_ig	ARTHROv5_10920_ARTHROv5_10921_ig	---	1.43357	0.0213903
ARTHROv5_10921	ARTHROv5_10921	conserved hypothetical protein	0.49691	0.0444238
ARTHROv5_10921_ARTHROv5_10922_ig	ARTHROv5_10921_ARTHROv5_10922_ig	---	1.10916	0.0296985
ARTHROv5_10922	ARTHROv5_10922	conserved hypothetical protein (fragment)	0.672334	0.0456864
ARTHROv5_10923	ARTHROv5_10923	protein of unknown function	0.696214	0.0283647
ARTHROv5_10924	ARTHROv5_10924	TPR repeat-containing protein	0.382896	0.0307336
ARTHROv5_10924_ARTHROv5_10925_ig	ARTHROv5_10924_ARTHROv5_10925_ig	---	0.394064	0.0779971
ARTHROv5_10925	ARTHROv5_10925	Death-on-curing family protein	-0.538888	0.155028
ARTHROv5_10926	ARTHROv5_10926	conserved protein of unknown function	-0.117075	0.764859
ARTHROv5_10926_ARTHROv5_10927_ig	ARTHROv5_10926_ARTHROv5_10927_ig	---	0.137884	0.494171
ARTHROv5_10927	ARTHROv5_10927	conserved protein of unknown function	-0.0213702	0.931691
ARTHROv5_10928	ARTHROv5_10928	conserved hypothetical protein	0.631724	0.00958294
ARTHROv5_10929	ARTHROv5_10929	conserved hypothetical protein	0.423754	0.0441741
ARTHROv5_10929_ARTHROv5_10930_ig	ARTHROv5_10929_ARTHROv5_10930_ig	---	0.352735	0.107912
ARTHROv5_10930	ARTHROv5_10930	conserved hypothetical protein	0.17488	0.3999
ARTHROv5_10931	ARTHROv5_10931	conserved hypothetical protein	0.691208	0.00994741
ARTHROv5_10931_ARTHROv5_10932_ig	ARTHROv5_10931_ARTHROv5_10932_ig	---	-0.767362	0.0201703
ARTHROv5_10932	ARTHROv5_10932	conserved hypothetical protein (fragment part 1)	-0.877368	0.0389372
ARTHROv5_10933	ARTHROv5_10933	conserved protein of unknown function	0.051052	0.837129
ARTHROv5_10933_ARTHROv5_10934_ig	ARTHROv5_10933_ARTHROv5_10934_ig	---	-0.025119	0.969222
ARTHROv5_10934	ARTHROv5_10934	putative metallopeptidase, M22 family	0.0136852	0.984451
ARTHROv5_10935	cbiQ2	ABC-type cobalt transport system, permease component CbiQ	-0.353565	0.282288
ARTHROv5_10935_ARTHROv5_10936_ig	ARTHROv5_10935_ARTHROv5_10936_ig	---	-0.46766	0.0755617
ARTHROv5_10936	cbiM2	Cobalamin biosynthesis protein CbiM	-1.16416	0.000766526
ARTHROv5_10937	ARTHROv5_10937	conserved hypothetical protein (fragment)	-0.99071	0.00389094
ARTHROv5_10937_ARTHROv5_10938_ig	ARTHROv5_10937_ARTHROv5_10938_ig	---	-1.26061	0.0031633
ARTHROv5_10938	ARTHROv5_10938	conserved hypothetical protein	-0.88741	0.00118247
ARTHROv5_10938_ARTHROv5_10939_ig	ARTHROv5_10938_ARTHROv5_10939_ig	---	-0.339933	0.164324
ARTHROv5_10939	ARTHROv5_10939	putative bacterioferritin	-0.209987	0.115948
ARTHROv5_10939_ARTHROv5_10940_ig	ARTHROv5_10939_ARTHROv5_10940_ig	---	0.334123	0.112852
ARTHROv5_10940	ARTHROv5_10940	conserved hypothetical protein	0.213578	0.213541
ARTHROv5_10941	ARTHROv5_10941	hypothetical protein (secreted)	0.0759199	0.592173
ARTHROv5_10941_ARTHROv5_10942_ig	ARTHROv5_10941_ARTHROv5_10942_ig	---	-0.283855	0.212117
ARTHROv5_10942	ARTHROv5_10942	putative phycobilisome protein	0.319734	0.0528221
ARTHROv5_10943	ARTHROv5_10943	putative phycobilisome linker polypeptide	0.398813	0.011035
ARTHROv5_10944	cphA	Cyanophycin synthetase	1.58205	0.0020921
ARTHROv5_10944_ARTHROv5_10945_ig	ARTHROv5_10944_ARTHROv5_10945_ig	---	0.590855	0.0142596
ARTHROv5_10945	cphB	Cyanophycinase	-0.122288	0.368758
ARTHROv5_10946	ARTHROv5_10946	protein of unknown function	-0.13238	0.58728
ARTHROv5_10946_ARTHROv5_10947_ig	ARTHROv5_10946_ARTHROv5_10947_ig	---	-2.11626	0.00324122
ARTHROv5_10947	ARTHROv5_10947	protein of unknown function	0.336476	0.59127
ARTHROv5_10947_ARTHROv5_10948_ig	ARTHROv5_10947_ARTHROv5_10948_ig	---	0.706397	0.0127797
ARTHROv5_10948	trmD	tRNA (guanine-N(1)-)-methyltransferase (M1G- methyltransferase) (tRNA [GM37] methyltransferase)	0.12501	0.294825
ARTHROv5_10949	ARTHROv5_10949	protein of unknown function	0.073998	0.525613
ARTHROv5_10950	ARTHROv5_10950	conserved hypothetical protein (membrane)	-0.817717	0.0107177
ARTHROv5_10950_ARTHROv5_10951_ig	ARTHROv5_10950_ARTHROv5_10951_ig	---	-1.38604	0.00257789
ARTHROv5_10951	ycjM	putative glucosyltransferase	-1.7118	0.000494723
ARTHROv5_10951_ARTHROv5_10952_ig	ARTHROv5_10951_ARTHROv5_10952_ig	---	-0.515511	0.0660842
ARTHROv5_10952	ARTHROv5_10952	Na(+)/H(+) antiporter	-0.0223434	0.935317
ARTHROv5_10952_ARTHROv5_10953_ig	ARTHROv5_10952_ARTHROv5_10953_ig	---	0.34963	0.0350493
ARTHROv5_10953	ARTHROv5_10953	conserved protein of unknown function	0.171476	0.316665
ARTHROv5_10954	ARTHROv5_10954	transposase, IS4 family	0.0468753	0.862404
ARTHROv5_10954_ARTHROv5_10955_ig	ARTHROv5_10954_ARTHROv5_10955_ig	---	0.0676595	0.684415
ARTHROv5_10955	ARTHROv5_10955	conserved protein of unknown function	0.257928	0.0753023
ARTHROv5_10957	ARTHROv5_10957	hypothetical protein	-0.0663323	0.634308
ARTHROv5_10958	ARTHROv5_10958	conserved protein of unknown function	-0.152613	0.253994
ARTHROv5_10959	ARTHROv5_10959	transposase	0.338154	0.0594201
ARTHROv5_10959_ARTHROv5_10960_ig	ARTHROv5_10959_ARTHROv5_10960_ig	---	0.0228984	0.936319
ARTHROv5_10961	ARTHROv5_10961	transposase, IS630 family (fragment)	0.307932	0.0817669
ARTHROv5_10961_ARTHROv5_10962_ig	ARTHROv5_10961_ARTHROv5_10962_ig	---	-0.0883586	0.500496
ARTHROv5_10962	czcD	Cation efflux system protein	0.638383	0.111519
ARTHROv5_10963	cry	Cryptochrome DASH	0.464714	0.235997
ARTHROv5_10963_ARTHROv5_10964_ig	ARTHROv5_10963_ARTHROv5_10964_ig	---	-0.155104	0.791678
ARTHROv5_10964	sucD	succinyl-CoA synthetase, NAD(P)-binding, alpha subunit	-0.727091	0.0266405
ARTHROv5_10964_ARTHROv5_10965_ig	ARTHROv5_10964_ARTHROv5_10965_ig	---	-0.953947	0.00874802
ARTHROv5_10965	sucC	Succinyl-CoA ligase [ADP-forming] subunit beta	-0.549951	0.100231
ARTHROv5_10966	ARTHROv5_10966	Glycosyl transferase, family 2	-0.722713	0.00162341
ARTHROv5_10966_ARTHROv5_10967_ig	ARTHROv5_10966_ARTHROv5_10967_ig	---	0.426383	0.0771866
ARTHROv5_10967	ARTHROv5_10967	conserved hypothetical protein	0.327279	0.234337
ARTHROv5_10967_ARTHROv5_10968_ig	ARTHROv5_10967_ARTHROv5_10968_ig	---	-0.501629	0.0669742
ARTHROv5_10968	ARTHROv5_10968	conserved hypothetical protein	-0.540002	0.0413357
ARTHROv5_10969	ARTHROv5_10969	conserved hypothetical protein	-1.04517	0.00277513
ARTHROv5_10969_ARTHROv5_10970_ig	ARTHROv5_10969_ARTHROv5_10970_ig	---	-1.19846	0.000571365
ARTHROv5_10970	ARTHROv5_10970	conserved hypothetical protein	-2.23754	8.4773e-05
ARTHROv5_10970_ARTHROv5_10971_ig	ARTHROv5_10970_ARTHROv5_10971_ig	---	-2.72358	0.000163142
ARTHROv5_10971	ARTHROv5_10971	conserved hypothetical protein, HicB-like	-2.07098	0.000140122
ARTHROv5_10971_ARTHROv5_10972_ig	ARTHROv5_10971_ARTHROv5_10972_ig	---	-0.414042	0.0460557
ARTHROv5_10972	ARTHROv5_10972	conserved hypothetical protein, HicA-like	-0.462983	0.0486729
ARTHROv5_10972_ARTHROv5_10973_ig	ARTHROv5_10972_ARTHROv5_10973_ig	---	0.971595	0.00895366
ARTHROv5_10973	sigF	group III RNA polymerase sigma factor SigF (rpoD family; ECF-type)	0.184391	0.154845
ARTHROv5_10974_ARTHROv5_10975_ig	ARTHROv5_10974_ARTHROv5_10975_ig	---	-0.563731	0.185852
ARTHROv5_10975	gcvH	Glycine cleavage system H protein	-1.16956	0.000742505
ARTHROv5_10976	ARTHROv5_10976	conserved protein of unknown function	-0.732145	0.0154681
ARTHROv5_10976_ARTHROv5_10977_ig	ARTHROv5_10976_ARTHROv5_10977_ig	---	-0.684428	0.342092
ARTHROv5_10977	ARTHROv5_10977	exported protein of unknown function	-0.0821454	0.686367
ARTHROv5_10977_ARTHROv5_10978_ig	ARTHROv5_10977_ARTHROv5_10978_ig	---	-0.554597	0.0959245
ARTHROv5_10978	ARTHROv5_10978	membrane protein of unknown function	-0.453717	0.0148126
ARTHROv5_10979	ARTHROv5_10979	JmjC domain protein Transcription factor jumonji/aspartyl beta-hydroxylase	-0.296632	0.0365844
ARTHROv5_10979_ARTHROv5_10980_ig	ARTHROv5_10979_ARTHROv5_10980_ig	---	-0.0493596	0.862404
ARTHROv5_10980	ARTHROv5_10980	conserved protein of unknown function	-0.852114	0.0133403
ARTHROv5_10981	ARTHROv5_10981	conserved protein of unknown function	0.486946	0.0329403
ARTHROv5_10981_ARTHROv5_10982_ig	ARTHROv5_10981_ARTHROv5_10982_ig	---	-0.274368	0.578098
ARTHROv5_10982	ARTHROv5_10982	putative hydrolase	-0.535827	0.0341829
ARTHROv5_10983	ARTHROv5_10983	conserved hypothetical protein	-1.1888	0.00135804
ARTHROv5_10983_ARTHROv5_10984_ig	ARTHROv5_10983_ARTHROv5_10984_ig	---	-0.468565	0.0201346
ARTHROv5_10984	psaA	Photosystem I P700 chlorophyll a apoprotein A1 (PsaA)	-0.0796335	0.480313
ARTHROv5_10984_ARTHROv5_10985_ig	ARTHROv5_10984_ARTHROv5_10985_ig	---	-0.0679011	0.671462
ARTHROv5_10985	psaB	Photosystem I P700 chlorophyll a apoprotein A2 (PsaB)	-0.0301941	0.794534
ARTHROv5_10986	ribC	Riboflavin synthase alpha chain	-0.596808	0.0501047
ARTHROv5_10986_ARTHROv5_10987_ig	ARTHROv5_10986_ARTHROv5_10987_ig	---	0.24462	0.633124
ARTHROv5_10987	ARTHROv5_10987	conserved hypothetical protein	0.0964223	0.525466
ARTHROv5_10988	ARTHROv5_10988	putative oxidoreductase, aldo/keto reductase family	0.673257	0.00838923
ARTHROv5_10989	ARTHROv5_10989	hypothetical protein	0.307464	0.186211
ARTHROv5_10989_ARTHROv5_10990_ig	ARTHROv5_10989_ARTHROv5_10990_ig	---	0.532858	0.169414
ARTHROv5_10990	ARTHROv5_10990	transposase, IS4 family	0.063856	0.71232
ARTHROv5_10990_ARTHROv5_10991_ig	ARTHROv5_10990_ARTHROv5_10991_ig	---	-0.255856	0.063605
ARTHROv5_10991	ARTHROv5_10991	protein of unknown function	0.217203	0.17238
ARTHROv5_10992	ARTHROv5_10992	hypothetical protein (membrane)	0.0555655	0.722736
ARTHROv5_10993	ARTHROv5_10993	conserved membrane protein of unknown function	0.0829578	0.707491
ARTHROv5_10993_ARTHROv5_10994_ig	ARTHROv5_10993_ARTHROv5_10994_ig	---	0.163829	0.339794
ARTHROv5_10994	ARTHROv5_10994	hypothetical protein (membrane)	0.389599	0.196964
ARTHROv5_10994_ARTHROv5_10995_ig	ARTHROv5_10994_ARTHROv5_10995_ig	---	-0.568351	0.281045
ARTHROv5_10995	ARTHROv5_10995	conserved hypothetical protein (secreted)	-0.181761	0.376914
ARTHROv5_10996	ARTHROv5_10996	transposase, IS605 family, OrfB	-0.199096	0.119909
ARTHROv5_10996_ARTHROv5_10997_ig	ARTHROv5_10996_ARTHROv5_10997_ig	---	0.0136398	0.936648
ARTHROv5_10997	spkF	Ser/Thr protein kinase	0.0435447	0.719895
ARTHROv5_10997_ARTHROv5_10998_ig	ARTHROv5_10997_ARTHROv5_10998_ig	---	-0.750142	0.0157494
ARTHROv5_10998	ARTHROv5_10998	putative RuBisCO transcriptional regulator, RbcR-like	-0.639875	0.0198211
ARTHROv5_10999	ARTHROv5_10999	putative RuBisCO transcriptional regulator, RbcR-like	-0.498331	0.0156746
ARTHROv5_11000	ARTHROv5_11000	conserved hypothetical protein, NnrU-like	-0.512226	0.0765098
ARTHROv5_11001	trxA4	Thioredoxin-1	-1.38281	0.00029618
ARTHROv5_11001_ARTHROv5_11002_ig	ARTHROv5_11001_ARTHROv5_11002_ig	---	-0.872316	0.0413628
ARTHROv5_11002	ARTHROv5_11002	conserved hypothetical protein	-1.21965	0.00117297
ARTHROv5_11003	tal	Transaldolase	-0.350843	0.404525
ARTHROv5_11003_ARTHROv5_11004_ig	ARTHROv5_11003_ARTHROv5_11004_ig	---	0.595559	0.0677506
ARTHROv5_11004	ARTHROv5_11004	hypothetical protein	-0.452181	0.026311
ARTHROv5_11004_ARTHROv5_11005_ig	ARTHROv5_11004_ARTHROv5_11005_ig	---	-0.820204	0.00117281
ARTHROv5_11005	tktA	transketolase 1, thiamin-binding	-0.891583	0.00240268
ARTHROv5_11005_ARTHROv5_11006_ig	ARTHROv5_11005_ARTHROv5_11006_ig	---	-0.0677029	0.880755
ARTHROv5_11006	rnhA	Ribonuclease H (RNase HI, degrades RNA of DNA-RNA hybrids	0.268097	0.119769
ARTHROv5_11006_ARTHROv5_11007_ig	ARTHROv5_11006_ARTHROv5_11007_ig	---	-0.736875	0.355888
ARTHROv5_11007	purH	Bifunctional purine biosynthesis protein purH [Includes: Phosphoribosylaminoimidazolecarboxamide formyltransferase ; IMP cyclohydrolase]	-0.591878	0.0135951
ARTHROv5_11007_ARTHROv5_11008_ig	ARTHROv5_11007_ARTHROv5_11008_ig	---	0.258092	0.19993
ARTHROv5_11008	ARTHROv5_11008	putative Cellulose 1,4-beta-cellobiosidase	-0.501437	0.0386729
ARTHROv5_11008_ARTHROv5_11009_ig	ARTHROv5_11008_ARTHROv5_11009_ig	---	-0.160951	0.655626
ARTHROv5_11009	cpxR	two-component response regulator (CheY-like receiver)	-1.61644	0.000392223
ARTHROv5_11009_ARTHROv5_11010_ig	ARTHROv5_11009_ARTHROv5_11010_ig	---	-0.798742	0.00803923
ARTHROv5_11010	ARTHROv5_11010	transposase, IS605 family, OrfB (fragment)	-0.0664543	0.780152
ARTHROv5_11010_ARTHROv5_11011_ig	ARTHROv5_11010_ARTHROv5_11011_ig	---	0.247094	0.151338
ARTHROv5_11011	ARTHROv5_11011	transposase, IS605 family, OrfB (fragment)	-0.101727	0.534668
ARTHROv5_11012	ARTHROv5_11012	hypothetical protein	-0.105306	0.682817
ARTHROv5_11012_ARTHROv5_11013_ig	ARTHROv5_11012_ARTHROv5_11013_ig	---	0.197496	0.58728
ARTHROv5_11013	ARTHROv5_11013	conserved hypothetical protein	0.0563382	0.881258
ARTHROv5_11013_ARTHROv5_11014_ig	ARTHROv5_11013_ARTHROv5_11014_ig	---	-0.358397	0.664656
ARTHROv5_11014	ARTHROv5_11014	putative sodium/sulphate symporter	-0.771166	0.0231004
ARTHROv5_11014_ARTHROv5_11015_ig	ARTHROv5_11014_ARTHROv5_11015_ig	---	-0.840349	0.109224
ARTHROv5_11015	fusA1	protein chain elongation factor EF-G, GTP-binding	-0.940518	0.00148271
ARTHROv5_11015_ARTHROv5_11016_ig	ARTHROv5_11015_ARTHROv5_11016_ig	---	-0.648966	0.129515
ARTHROv5_11016	ilvY	Acetolactate synthase	1.53905	0.000151222
ARTHROv5_11016_ARTHROv5_11017_ig	ARTHROv5_11016_ARTHROv5_11017_ig	---	1.52693	0.00117816
ARTHROv5_11017	leuA2	2-isopropylmalate synthase	1.44101	0.000258845
ARTHROv5_11017_ARTHROv5_11018_ig	ARTHROv5_11017_ARTHROv5_11018_ig	---	0.132662	0.383589
ARTHROv5_11018	gtrB	bactoprenol glucosyl transferase	0.0323126	0.934515
ARTHROv5_11018_ARTHROv5_11019_ig	ARTHROv5_11018_ARTHROv5_11019_ig	---	-1.24044	0.294391
ARTHROv5_11019	ARTHROv5_11019	hypothetical protein	-1.1847	0.00167307
ARTHROv5_11019_ARTHROv5_11020_ig	ARTHROv5_11019_ARTHROv5_11020_ig	---	0.266974	0.232374
ARTHROv5_11020	ARTHROv5_11020	conserved protein of unknown function	0.15957	0.407639
ARTHROv5_11021	ARTHROv5_11021	conserved protein of unknown function	-0.60885	0.313907
ARTHROv5_11022	ARTHROv5_11022	hypothetical protein (secreted)	-1.18715	0.000297593
ARTHROv5_11022_ARTHROv5_11023_ig	ARTHROv5_11022_ARTHROv5_11023_ig	---	-1.24579	0.000647358
ARTHROv5_11023	ARTHROv5_11023	hypothetical protein (secreted)	-1.23238	0.00165618
ARTHROv5_11023_ARTHROv5_11024_ig	ARTHROv5_11023_ARTHROv5_11024_ig	---	-1.35209	0.00762595
ARTHROv5_11024	ARTHROv5_11024	conserved protein of unknown function	-0.975972	0.000736612
ARTHROv5_11024_ARTHROv5_11025_ig	ARTHROv5_11024_ARTHROv5_11025_ig	---	-0.364548	0.306938
ARTHROv5_11025	ARTHROv5_11025	conserved protein of unknown function	-0.953535	0.00912589
ARTHROv5_11025_ARTHROv5_11026_ig	ARTHROv5_11025_ARTHROv5_11026_ig	---	-1.79863	0.0144802
ARTHROv5_11026	ARTHROv5_11026	conserved hypothetical protein (secreted)	-1.0304	0.0169514
ARTHROv5_11026_ARTHROv5_11027_ig	ARTHROv5_11026_ARTHROv5_11027_ig	---	-0.641813	0.463591
ARTHROv5_11027	ARTHROv5_11027	two-component response regulator (CheY-like)	-1.38464	0.000642907
ARTHROv5_11028	ARTHROv5_11028	Multi-sensor signal transduction histidine kinase	-0.229182	0.109908
ARTHROv5_11029	ARTHROv5_11029	conserved hypothetical protein (membrane)	0.152216	0.447553
ARTHROv5_11030	ARTHROv5_11030	putative antibiotic biosynthesis monooxygenase	-1.35033	0.000788361
ARTHROv5_11030_ARTHROv5_11031_ig	ARTHROv5_11030_ARTHROv5_11031_ig	---	-0.78039	0.0010309
ARTHROv5_11031	rplC	50S ribosomal subunit protein L3	-1.20983	0.000885806
ARTHROv5_11032	rplD	50S ribosomal subunit protein L4	-1.19114	0.000731448
ARTHROv5_11033	rplW	50S ribosomal subunit protein L23	-0.960683	0.00113523
ARTHROv5_11033_ARTHROv5_11034_ig	ARTHROv5_11033_ARTHROv5_11034_ig	---	-1.21923	0.000352105
ARTHROv5_11034	rplB	50S ribosomal subunit protein L2	-1.09619	0.00143184
ARTHROv5_11034_ARTHROv5_11035_ig	ARTHROv5_11034_ARTHROv5_11035_ig	---	-0.986188	0.0147998
ARTHROv5_11035	rpsS	30S ribosomal subunit protein S19	-1.81277	0.000303558
ARTHROv5_11035_ARTHROv5_11036_ig	ARTHROv5_11035_ARTHROv5_11036_ig	---	-0.995626	0.000806174
ARTHROv5_11036	rplV	50S ribosomal subunit protein L22	-1.13409	0.000383976
ARTHROv5_11036_ARTHROv5_11037_ig	ARTHROv5_11036_ARTHROv5_11037_ig	---	-1.87676	0.000278876
ARTHROv5_11037	rpsC	30S ribosomal subunit protein S3	-1.26552	0.000415085
ARTHROv5_11037_ARTHROv5_11038_ig	ARTHROv5_11037_ARTHROv5_11038_ig	---	-1.54313	0.000973144
ARTHROv5_11038	rplP	50S ribosomal subunit protein L16	-1.7036	0.000160119
ARTHROv5_11039	rpmC	50S ribosomal protein L29	-1.8601	0.000150759
ARTHROv5_11039_ARTHROv5_11040_ig	ARTHROv5_11039_ARTHROv5_11040_ig	---	-2.15668	0.000281636
ARTHROv5_11040	rpsQ	30S ribosomal subunit protein S17	-2.17772	6.86605e-05
ARTHROv5_11041	rplN	50S ribosomal subunit protein L14	-2.88086	4.24256e-05
ARTHROv5_11042	rplX	50S ribosomal subunit protein L24	-2.58474	0.000125809
ARTHROv5_11042_ARTHROv5_11043_ig	ARTHROv5_11042_ARTHROv5_11043_ig	---	-2.17231	6.86605e-05
ARTHROv5_11043	rplE	50S ribosomal subunit protein L5	-2.06439	8.39573e-05
ARTHROv5_11044	rpsH	30S ribosomal subunit protein S8	-1.47589	0.00136332
ARTHROv5_11045	rplF	50S ribosomal subunit protein L6	-1.81855	0.000157364
ARTHROv5_11046	rplR	50S ribosomal subunit protein L18	-1.94393	7.93278e-05
ARTHROv5_11047	rpsE	30S ribosomal subunit protein S5	-0.769066	0.00211343
ARTHROv5_11047_ARTHROv5_11048_ig	ARTHROv5_11047_ARTHROv5_11048_ig	---	-0.896133	0.00216816
ARTHROv5_11048	rplO	50S ribosomal subunit protein L15	-0.782998	0.00150017
ARTHROv5_11049	secY	preprotein translocase membrane subunit	-1.25382	0.000642907
ARTHROv5_11050	adk	Adenylate kinase (ATP-AMP transphosphorylase)	-1.09404	0.00148361
ARTHROv5_11050_ARTHROv5_11051_ig	ARTHROv5_11050_ARTHROv5_11051_ig	---	-1.59148	0.000615311
ARTHROv5_11051	infA	translation initiation factor IF-1	-1.95264	0.000625719
ARTHROv5_11051_ARTHROv5_11052_ig	ARTHROv5_11051_ARTHROv5_11052_ig	---	-0.585026	0.00322882
ARTHROv5_11052	rpsM	30S ribosomal subunit protein S13	-0.800668	0.00213482
ARTHROv5_11053	rpsK	30S ribosomal subunit protein S11	-0.437747	0.25531
ARTHROv5_11053_ARTHROv5_11054_ig	ARTHROv5_11053_ARTHROv5_11054_ig	---	-0.769372	0.02619
ARTHROv5_11054	rpoA	RNA polymerase, alpha subunit	-0.51716	0.0167216
ARTHROv5_11054_ARTHROv5_11055_ig	ARTHROv5_11054_ARTHROv5_11055_ig	---	-0.921612	0.0013535
ARTHROv5_11055	rplQ	50S ribosomal subunit protein L17	-0.310882	0.0447402
ARTHROv5_11056	truA	tRNA-pseudouridine synthase A	-0.204238	0.187604
ARTHROv5_11057	rplM	50S ribosomal subunit protein L13	-1.53262	0.000204544
ARTHROv5_11058	rpsI	30S ribosomal subunit protein S9	-1.53405	0.000170407
ARTHROv5_11058_ARTHROv5_11059_ig	ARTHROv5_11058_ARTHROv5_11059_ig	---	-1.67456	0.000202103
ARTHROv5_11059	rpmE	50S ribosomal protein L31	0.00518387	0.977944
ARTHROv5_11059_ARTHROv5_11060_ig	ARTHROv5_11059_ARTHROv5_11060_ig	---	0.265137	0.0994615
ARTHROv5_11060	prfA	peptide chain release factor RF-1	-0.208728	0.224027
ARTHROv5_11060_ARTHROv5_11061_ig	ARTHROv5_11060_ARTHROv5_11061_ig	---	0.222911	0.149803
ARTHROv5_11061	ARTHROv5_11061	putative response regulator receiver (CheY)	0.475134	0.00741606
ARTHROv5_11061_ARTHROv5_11062_ig	ARTHROv5_11061_ARTHROv5_11062_ig	---	-0.406813	0.0645171
ARTHROv5_11062	ARTHROv5_11062	putative ABC transporter, ATP-binding protein	-0.799049	0.00236426
ARTHROv5_11062_ARTHROv5_11063_ig	ARTHROv5_11062_ARTHROv5_11063_ig	---	-1.0775	0.000571365
ARTHROv5_11063	ARTHROv5_11063	hypothetical protein	-0.799721	0.00717398
ARTHROv5_11063_ARTHROv5_11064_ig	ARTHROv5_11063_ARTHROv5_11064_ig	---	-1.05073	0.0157547
ARTHROv5_11064	ARTHROv5_11064	CheY subfamily protein; Response regulator receiver domain protein (CheY)	-0.415173	0.0322061
ARTHROv5_11065	ARTHROv5_11065	conserved hypothetical protein	-0.182751	0.767121
ARTHROv5_11066	ARTHROv5_11066	conserved protein of unknown function	-1.09866	0.0179885
ARTHROv5_11066_ARTHROv5_11067_ig	ARTHROv5_11066_ARTHROv5_11067_ig	---	-0.693247	0.045021
ARTHROv5_11067	ARTHROv5_11067	Na-Ca exchanger/integrin-beta4	-0.167598	0.410151
ARTHROv5_11067_ARTHROv5_11068_ig	ARTHROv5_11067_ARTHROv5_11068_ig	---	0.563075	0.0334123
ARTHROv5_11068	dnaJ	chaperone DnaJ protein	0.195786	0.400516
ARTHROv5_11068_ARTHROv5_11069_ig	ARTHROv5_11068_ARTHROv5_11069_ig	---	0.134342	0.748639
ARTHROv5_11069	ARTHROv5_11069	putative resolvase, IS607 family	0.365458	0.018979
ARTHROv5_11070	ARTHROv5_11070	transposase, IS605 family, OrfB (fragment)	0.494912	0.0803163
ARTHROv5_11071	ARTHROv5_11071	transposase, IS605 family, OrfB (fragment)	0.105244	0.601743
ARTHROv5_11072	ARTHROv5_11072	conserved hypothetical protein	-0.809892	0.00228213
ARTHROv5_11072_ARTHROv5_11073_ig	ARTHROv5_11072_ARTHROv5_11073_ig	---	-0.942867	0.00280698
ARTHROv5_11073	glgC	glucose-1-phosphate adenylyltransferase	-0.717681	0.00172853
ARTHROv5_11075_ARTHROv5_11076_ig	ARTHROv5_11075_ARTHROv5_11076_ig	---	-0.442165	0.60156
ARTHROv5_11076	ARTHROv5_11076	conserved hypothetical protein	0.373562	0.0808198
ARTHROv5_11076_ARTHROv5_11077_ig	ARTHROv5_11076_ARTHROv5_11077_ig	---	-0.230263	0.510469
ARTHROv5_11077	ARTHROv5_11077	conserved hypothetical protein (secreted)	-0.17643	0.294746
ARTHROv5_11078	ARTHROv5_11078	putative methyltransferase type 11	0.0636673	0.836304
ARTHROv5_11078_ARTHROv5_11079_ig	ARTHROv5_11078_ARTHROv5_11079_ig	---	0.192447	0.323319
ARTHROv5_11079	ARTHROv5_11079	conserved hypothetical protein	-0.622267	0.0519719
ARTHROv5_11080	ribD	Riboflavin biosynthesis protein RibD [Includes: Diaminohydroxyphosphoribosylaminopyrimidine deaminase ; 5-amino-6-(5-phosphoribosylamino)uracil reductase]	-0.0605641	0.793873
ARTHROv5_11080_ARTHROv5_11081_ig	ARTHROv5_11080_ARTHROv5_11081_ig	---	0.365533	0.117935
ARTHROv5_11081	ARTHROv5_11081	putative retinal-forming carotenoid oxygenase	-0.257063	0.0938669
ARTHROv5_11081_ARTHROv5_11082_ig	ARTHROv5_11081_ARTHROv5_11082_ig	---	0.0223436	0.965451
ARTHROv5_11082	ARTHROv5_11082	putative folate/biopterin transporter	0.123948	0.444456
ARTHROv5_11082_ARTHROv5_11083_ig	ARTHROv5_11082_ARTHROv5_11083_ig	---	-0.764601	0.208293
ARTHROv5_11083	ARTHROv5_11083	conserved hypothetical protein (membrane)	-0.579602	0.0438161
ARTHROv5_11083_ARTHROv5_11084_ig	ARTHROv5_11083_ARTHROv5_11084_ig	---	0.238336	0.519701
ARTHROv5_11084	ARTHROv5_11084	protein of unknown function	0.220028	0.280378
ARTHROv5_11085	ARTHROv5_11085	protein of unknown function	0.0411152	0.856774
ARTHROv5_11085_ARTHROv5_11086_ig	ARTHROv5_11085_ARTHROv5_11086_ig	---	0.388306	0.0761503
ARTHROv5_11086	ARTHROv5_11086	Putative Subtilisin (fragment)	0.382265	0.0628306
ARTHROv5_11086_ARTHROv5_11087_ig	ARTHROv5_11086_ARTHROv5_11087_ig	---	0.392218	0.483339
ARTHROv5_11087	ARTHROv5_11087	conserved protein of unknown function	-0.181581	0.599053
ARTHROv5_11088	ARTHROv5_11088	conserved protein of unknown function	0.554293	0.145437
ARTHROv5_11089	ARTHROv5_11089	conserved protein of unknown function	1.12181	0.0502917
ARTHROv5_11089_ARTHROv5_11090_ig	ARTHROv5_11089_ARTHROv5_11090_ig	---	0.722467	0.0604228
ARTHROv5_11090	ARTHROv5_11090	conserved protein of unknown function	1.64283	0.00859203
ARTHROv5_11090_ARTHROv5_11091_ig	ARTHROv5_11090_ARTHROv5_11091_ig	---	0.398911	0.0244876
ARTHROv5_11092_ARTHROv5_11093_ig	ARTHROv5_11092_ARTHROv5_11093_ig	---	-0.0322855	0.9279
ARTHROv5_11093	ARTHROv5_11093	conserved protein of unknown function	-1.44543	0.000673351
ARTHROv5_11094	ARTHROv5_11094	putative permease, auxin efflux carrier-like	-1.04263	0.00311316
ARTHROv5_11095	ARTHROv5_11095	putative UDP-glucose 4-epimerase	-0.0969516	0.582244
ARTHROv5_11096	ARTHROv5_11096	conserved hypothetical protein (membrane)	-0.370926	0.173053
ARTHROv5_11096_ARTHROv5_11097_ig	ARTHROv5_11096_ARTHROv5_11097_ig	---	-0.0250828	0.903524
ARTHROv5_11097	ARTHROv5_11097	putative ABC-type sugar transport system, periplasmic component	-0.385977	0.147965
ARTHROv5_11098	ARTHROv5_11098	putative two-component hybrid sensor and regulator, histidine kinase	0.17375	0.321648
ARTHROv5_11099	ARTHROv5_11099	putative adenylate cyclase, family 3	0.256808	0.0870059
ARTHROv5_11100	ARTHROv5_11100	two-component response regulator	0.00447551	0.993313
ARTHROv5_11101	ARTHROv5_11101	hypothetical protein	-0.193704	0.739539
ARTHROv5_11101_ARTHROv5_11102_ig	ARTHROv5_11101_ARTHROv5_11102_ig	---	-0.0317664	0.955008
ARTHROv5_11102	ARTHROv5_11102	hypothetical protein	0.371504	0.167625
ARTHROv5_11103	ARTHROv5_11103	conserved protein of unknown function	1.54613	0.000790338
ARTHROv5_11103_ARTHROv5_11104_ig	ARTHROv5_11103_ARTHROv5_11104_ig	---	-0.698375	0.358806
ARTHROv5_11104	ARTHROv5_11104	conserved hypothetical protein	-0.369153	0.0263308
ARTHROv5_11105	ARTHROv5_11105	conserved protein of unknown function	0.267627	0.0657626
ARTHROv5_11106	ARTHROv5_11106	hypothetical protein	-0.00587787	0.987027
ARTHROv5_11106_ARTHROv5_11107_ig	ARTHROv5_11106_ARTHROv5_11107_ig	---	-0.147606	0.435174
ARTHROv5_11107	ARTHROv5_11107	chromosome partition protein, SMC-like	1.13658	0.00121975
ARTHROv5_11107_ARTHROv5_11108_ig	ARTHROv5_11107_ARTHROv5_11108_ig	---	1.5354	0.00705783
ARTHROv5_11108	ARTHROv5_11108	hypothetical protein (secreted)	1.70185	0.000323796
ARTHROv5_11108_ARTHROv5_11109_ig	ARTHROv5_11108_ARTHROv5_11109_ig	---	0.572573	0.0241621
ARTHROv5_11110	ARTHROv5_11110	Chromosome segregation protein SMC (Modular protein)	0.686557	0.0171339
ARTHROv5_11110_ARTHROv5_11111_ig	ARTHROv5_11110_ARTHROv5_11111_ig	---	0.563027	0.00388558
ARTHROv5_11111	ARTHROv5_11111	conserved hypothetical protein	0.570792	0.0042396
ARTHROv5_11111_ARTHROv5_11112_ig	ARTHROv5_11111_ARTHROv5_11112_ig	---	0.738214	0.016195
ARTHROv5_11112	psb28	Photosystem II reaction center psb28 protein (Photosystem II reaction center W protein) (Photosystem II 13 kDa protein)	0.072354	0.730638
ARTHROv5_11112_ARTHROv5_11113_ig	ARTHROv5_11112_ARTHROv5_11113_ig	---	0.320786	0.196964
ARTHROv5_11113	trpC	Indole-3-glycerol phosphate synthase (IGPS)	1.00158	0.000606464
ARTHROv5_11114	ARTHROv5_11114	putative serine--pyruvate aminotransferase	0.910012	0.0116176
ARTHROv5_11114_ARTHROv5_11115_ig	ARTHROv5_11114_ARTHROv5_11115_ig	---	-0.117476	0.757529
ARTHROv5_11115	ARTHROv5_11115	conserved hypothetical protein	-0.439709	0.107296
ARTHROv5_11115_ARTHROv5_11116_ig	ARTHROv5_11115_ARTHROv5_11116_ig	---	-0.491657	0.0118497
ARTHROv5_11116	ksgA	S-adenosylmethionine-6-N',N'-adenosyl (rRNA) dimethyltransferase	0.636175	0.0106741
ARTHROv5_11117	ispE	4-diphosphocytidyl-2-C-methyl-D-erythritol kinase	0.3057	0.0896301
ARTHROv5_11118	ARTHROv5_11118	conserved hypothetical protein	2.09129	0.000236207
ARTHROv5_11119	eno	enolase	1.81005	0.000431535
ARTHROv5_11120	ldhA	fermentative D-lactate dehydrogenase, NAD-dependent	1.54846	0.000308379
ARTHROv5_11120_ARTHROv5_11121_ig	ARTHROv5_11120_ARTHROv5_11121_ig	---	0.0710163	0.91911
ARTHROv5_11121	ARTHROv5_11121	conserved hypothetical protein (membrane)	-0.191255	0.711226
ARTHROv5_11122	ARTHROv5_11122	hypothetical protein (secreted)	0.170545	0.357842
ARTHROv5_11123	ARTHROv5_11123	conserved hypothetical protein	0.516109	0.326288
ARTHROv5_11124	rimM	16S rRNA processing protein RimM	0.134945	0.351057
ARTHROv5_11124_ARTHROv5_11125_ig	ARTHROv5_11124_ARTHROv5_11125_ig	---	0.186633	0.462886
ARTHROv5_11125	ARTHROv5_11125	putative transcriptional regulator	-0.139741	0.476572
ARTHROv5_11126	ARTHROv5_11126	hypothetical protein	0.128652	0.676722
ARTHROv5_11127	ARTHROv5_11127	putative outer membrane efflux protein	-0.828703	0.00233888
ARTHROv5_11128	ARTHROv5_11128	conserved protein of unknown function	-1.15186	0.00912666
ARTHROv5_11129	fdx	Ferredoxin (2Fe-2S)	-1.60201	0.000383976
ARTHROv5_11130	ARTHROv5_11130	Universal stress protein, UspA-like	-3.85651	7.69446e-05
ARTHROv5_11130_ARTHROv5_11131_ig	ARTHROv5_11130_ARTHROv5_11131_ig	---	-4.49248	0.000555596
ARTHROv5_11131	ARTHROv5_11131	putative retrointron [Includes: Reverse-transcriptase ; RNA maturase ; HNH endonuclease] (fragment)	-2.17266	0.00043003
ARTHROv5_11132	ARTHROv5_11132	transposase (fragment)	-0.755451	0.0026926
ARTHROv5_11132_ARTHROv5_11133_ig	ARTHROv5_11132_ARTHROv5_11133_ig	---	-0.481685	0.0143165
ARTHROv5_11133	ARTHROv5_11133	conserved protein of unknown function	-0.502416	0.0530189
ARTHROv5_11133_ARTHROv5_11134_ig	ARTHROv5_11133_ARTHROv5_11134_ig	---	-0.604722	0.017093
ARTHROv5_11134	ARTHROv5_11134	transposase, IS605 family (fragment)	-0.224119	0.157428
ARTHROv5_11136	ARTHROv5_11136	conserved protein of unknown function	-0.655016	0.00301554
ARTHROv5_11136_ARTHROv5_11137_ig	ARTHROv5_11136_ARTHROv5_11137_ig	---	-0.789953	0.00167767
ARTHROv5_11137	ARTHROv5_11137	HNH endonuclease	-0.362513	0.0352718
ARTHROv5_11137_ARTHROv5_11138_ig	ARTHROv5_11137_ARTHROv5_11138_ig	---	-1.24299	0.00111628
ARTHROv5_11138	ARTHROv5_11138	conserved hypothetical protein	-1.8828	0.000502471
ARTHROv5_11139	ARTHROv5_11139	putative Peptidyl-prolyl cis-trans isomerase, cyclophilin family	-1.43909	0.000226028
ARTHROv5_11139_ARTHROv5_11140_ig	ARTHROv5_11139_ARTHROv5_11140_ig	---	0.469096	0.348517
ARTHROv5_11140	glsA	Glutaminase	0.836707	0.0364494
ARTHROv5_11140_ARTHROv5_11141_ig	ARTHROv5_11140_ARTHROv5_11141_ig	---	0.353453	0.462886
ARTHROv5_11141	ARTHROv5_11141	conserved hypothetical protein	0.251072	0.251323
ARTHROv5_11142	ARTHROv5_11142	conserved hypothetical protein	-0.32879	0.0341876
ARTHROv5_11142_ARTHROv5_11143_ig	ARTHROv5_11142_ARTHROv5_11143_ig	---	0.137907	0.568296
ARTHROv5_11143	ARTHROv5_11143	conserved hypothetical protein (secreted)	0.461748	0.0192301
ARTHROv5_11143_ARTHROv5_11144_ig	ARTHROv5_11143_ARTHROv5_11144_ig	---	0.163285	0.235784
ARTHROv5_11144	ARTHROv5_11144	conserved hypothetical protein	-0.429069	0.173161
ARTHROv5_11144_ARTHROv5_11145_ig	ARTHROv5_11144_ARTHROv5_11145_ig	---	-0.34756	0.311842
ARTHROv5_11145	ARTHROv5_11145	hypothetical protein	0.315104	0.0452916
ARTHROv5_11145_ARTHROv5_11146_ig	ARTHROv5_11145_ARTHROv5_11146_ig	---	0.272733	0.150693
ARTHROv5_11146	ARTHROv5_11146	hypothetical protein	0.541087	0.0314719
ARTHROv5_11147	ARTHROv5_11147	conserved hypothetical protein	0.132182	0.443041
ARTHROv5_11148	ARTHROv5_11148	conserved hypothetical protein	0.420324	0.0994914
ARTHROv5_11148_ARTHROv5_11149_ig	ARTHROv5_11148_ARTHROv5_11149_ig	---	0.715677	0.0280302
ARTHROv5_11149	ARTHROv5_11149	conserved hypothetical protein	0.852405	0.00535279
ARTHROv5_11149_ARTHROv5_11150_ig	ARTHROv5_11149_ARTHROv5_11150_ig	---	0.795252	0.00976804
ARTHROv5_11150	hsdS	TypeI R-M system restriction enzyme subunit S, Type I restriction enzyme Asp8005ORF3655 S protein (Asp8005ORF3665 S protein)Subunit S of type I restriction-modification system	-0.378767	0.116946
ARTHROv5_11151	ARTHROv5_11151	hypothetical protein	-0.508476	0.20239
ARTHROv5_11152	ARTHROv5_11152	conserved hypothetical protein	-0.0914109	0.648635
ARTHROv5_11153	ARTHROv5_11153	hypothetical protein	-0.703189	0.0282015
ARTHROv5_11154	ARTHROv5_11154	hypothetical protein	-0.763764	0.0751333
ARTHROv5_11155	ARTHROv5_11155	hypothetical protein	-0.499019	0.102409
ARTHROv5_11156	ARTHROv5_11156	conserved hypothetical protein	-0.61195	0.0723811
ARTHROv5_11156_ARTHROv5_11157_ig	ARTHROv5_11156_ARTHROv5_11157_ig	---	-0.344859	0.230371
ARTHROv5_11157	hsdM	TypeI R-M system DNA methylase M, Type I restriction enzyme Asp8005ORF3662 M protein (M.Asp8005ORF3662)	-0.0417291	0.893848
ARTHROv5_11158	ARTHROv5_11158	transposase, IS605 family (fragment)	0.197611	0.161566
ARTHROv5_11159_ARTHROv5_11160_ig	ARTHROv5_11159_ARTHROv5_11160_ig	---	1.01416	0.00451352
ARTHROv5_11160	hsdR	TypeI R-M system restriction enzyme R, Type I restriction enzyme Asp8005ORF3665 R protein (Asp8005ORF3665 R protein)	0.772212	0.02023
ARTHROv5_11160_ARTHROv5_11161_ig	ARTHROv5_11160_ARTHROv5_11161_ig	---	0.270663	0.152907
ARTHROv5_11161	ARTHROv5_11161	hypothetical protein	0.530167	0.0377178
ARTHROv5_11161_ARTHROv5_11162_ig	ARTHROv5_11161_ARTHROv5_11162_ig	---	-0.589531	0.343999
ARTHROv5_11162	ARTHROv5_11162	conserved hypothetical protein	-0.631278	0.00752035
ARTHROv5_11163	ARTHROv5_11163	conserved hypothetical protein	-0.642757	0.032655
ARTHROv5_11163_ARTHROv5_11164_ig	ARTHROv5_11163_ARTHROv5_11164_ig	---	-0.460164	0.0323489
ARTHROv5_11164	int	Integrase/recombinase	0.6632	0.0774462
ARTHROv5_11164_ARTHROv5_11165_ig	ARTHROv5_11164_ARTHROv5_11165_ig	---	1.12963	0.0271617
ARTHROv5_11165	prfA	Peptide chain release factor 1 (fragment)	0.416042	0.0742021
ARTHROv5_11165_ARTHROv5_11166_ig	ARTHROv5_11165_ARTHROv5_11166_ig	---	-0.0237461	0.954118
ARTHROv5_11166	ARTHROv5_11166	conserved protein of unknown function	0.28736	0.331555
ARTHROv5_11167	ARTHROv5_11167	conserved hypothetical protein	-0.257486	0.24262
ARTHROv5_11168	ARTHROv5_11168	conserved hypothetical protein (fragment)	0.114889	0.627288
ARTHROv5_11168_ARTHROv5_11169_ig	ARTHROv5_11168_ARTHROv5_11169_ig	---	-0.189085	0.361692
ARTHROv5_11169	ARTHROv5_11169	conserved hypothetical protein	0.362471	0.169828
ARTHROv5_11170	ARTHROv5_11170	Type II Site-specific DNA-methyltransferase (cytosine-N(4)-specific)	0.347568	0.16381
ARTHROv5_11170_ARTHROv5_11171_ig	ARTHROv5_11170_ARTHROv5_11171_ig	---	0.353297	0.142277
ARTHROv5_11171	ARTHROv5_11171	putative site-specific tyrosine recombinase, XerD-like	-0.0639555	0.709797
ARTHROv5_11171_ARTHROv5_11172_ig	ARTHROv5_11171_ARTHROv5_11172_ig	---	0.808709	0.115674
ARTHROv5_11172	ARTHROv5_11172	conserved hypothetical protein	0.704232	0.0176809
ARTHROv5_11173	ARTHROv5_11173	conserved protein of unknown function	0.987064	0.00220068
ARTHROv5_11174	ARTHROv5_11174	Peptide chain release factor 1 (fragment)	0.696937	0.00595145
ARTHROv5_11175	ARTHROv5_11175	hypothetical protein	0.0920835	0.615856
ARTHROv5_11176	ARTHROv5_11176	conserved hypothetical protein	0.705944	0.0200329
ARTHROv5_11177	ARTHROv5_11177	conserved hypothetical protein	0.77681	0.00332739
ARTHROv5_11177_ARTHROv5_11178_ig	ARTHROv5_11177_ARTHROv5_11178_ig	---	0.756454	0.00218599
ARTHROv5_11178	ARTHROv5_11178	conserved protein of unknown function	0.396922	0.0314711
ARTHROv5_11178_ARTHROv5_11179_ig	ARTHROv5_11178_ARTHROv5_11179_ig	---	0.733978	0.339742
ARTHROv5_11179	ARTHROv5_11179	hypothetical protein	0.83949	0.015571
ARTHROv5_11179_ARTHROv5_11180_ig	ARTHROv5_11179_ARTHROv5_11180_ig	---	-0.0995938	0.615047
ARTHROv5_11180	ARTHROv5_11180	Peptide chain release factor 1	0.424121	0.466323
ARTHROv5_11181	ARTHROv5_11181	conserved hypothetical protein	-0.115091	0.704716
ARTHROv5_11182	ARTHROv5_11182	conserved hypothetical protein	-0.493214	0.22592
ARTHROv5_11183_ARTHROv5_11184_ig	ARTHROv5_11183_ARTHROv5_11184_ig	---	0.114672	0.584739
ARTHROv5_11184	ARTHROv5_11184	conserved hypothetical protein	0.195252	0.39174
ARTHROv5_11185	ARTHROv5_11185	conserved protein of unknown function	0.880149	0.00784158
ARTHROv5_11186	ARTHROv5_11186	protein of unknown function	1.16365	0.00625953
ARTHROv5_11186_ARTHROv5_11187_ig	ARTHROv5_11186_ARTHROv5_11187_ig	---	0.0986652	0.665124
ARTHROv5_11187	ARTHROv5_11187	putative plasmid stabilization system protein	0.218907	0.800987
ARTHROv5_11188	ARTHROv5_11188	conserved hypothetical protein	0.182477	0.591549
ARTHROv5_11188_ARTHROv5_11189_ig	ARTHROv5_11188_ARTHROv5_11189_ig	---	-0.0927399	0.559357
ARTHROv5_11189	ARTHROv5_11189	hypothetical protein	0.742206	0.0595299
ARTHROv5_11189_ARTHROv5_11190_ig	ARTHROv5_11189_ARTHROv5_11190_ig	---	1.18037	0.0103537
ARTHROv5_11190	ARTHROv5_11190	conserved hypothetical protein	1.44108	0.000736612
ARTHROv5_11191	ARTHROv5_11191	conserved hypothetical protein (fragment)	0.596125	0.02023
ARTHROv5_11191_ARTHROv5_11192_ig	ARTHROv5_11191_ARTHROv5_11192_ig	---	0.544936	0.0334553
ARTHROv5_11192	ARTHROv5_11192	conserved hypothetical protein	0.520094	0.0572336
ARTHROv5_11193	ARTHROv5_11193	conserved hypothetical protein	0.615039	0.105209
ARTHROv5_11193_ARTHROv5_11194_ig	ARTHROv5_11193_ARTHROv5_11194_ig	---	0.256612	0.560408
ARTHROv5_11194	ARTHROv5_11194	hypothetical protein	0.934723	0.000647358
ARTHROv5_11194_ARTHROv5_11195_ig	ARTHROv5_11194_ARTHROv5_11195_ig	---	0.889748	0.0126846
ARTHROv5_11195	ARTHROv5_11195	conserved hypothetical protein (fragment)	0.681695	0.058734
ARTHROv5_11196	ARTHROv5_11196	conserved hypothetical protein	1.00908	0.00446306
ARTHROv5_11196_ARTHROv5_11197_ig	ARTHROv5_11196_ARTHROv5_11197_ig	---	1.21369	0.000924574
ARTHROv5_11197	ARTHROv5_11197	putative transcriptional regulator, SpoVT/AbrB-like	1.13008	0.000787755
ARTHROv5_11198	ARTHROv5_11198	conserved hypothetical protein (fragment)	0.995803	0.022377
ARTHROv5_11198_ARTHROv5_11199_ig	ARTHROv5_11198_ARTHROv5_11199_ig	---	0.481881	0.0716844
ARTHROv5_11199	ARTHROv5_11199	hypothetical protein	0.724633	0.0105057
ARTHROv5_11200	ARTHROv5_11200	putative plasmid stabilization system protein	0.594507	0.0199163
ARTHROv5_11201	ARTHROv5_11201	conserved hypothetical protein	0.968555	0.0183586
ARTHROv5_11201_ARTHROv5_11202_ig	ARTHROv5_11201_ARTHROv5_11202_ig	---	-0.280153	0.657751
ARTHROv5_11202	ARTHROv5_11202	protein of unknown function	0.796129	0.0158493
ARTHROv5_11204	ARTHROv5_11204	conserved protein of unknown function	0.993037	0.0216002
ARTHROv5_11205	ARTHROv5_11205	conserved protein of unknown function	0.442295	0.192836
ARTHROv5_11206	ARTHROv5_11206	hypothetical protein	0.363722	0.127753
ARTHROv5_11207	ARTHROv5_11207	conserved protein of unknown function	0.2457	0.616695
ARTHROv5_11208	ARTHROv5_11208	conserved hypothetical protein (fragment)	0.269314	0.398951
ARTHROv5_11209	ARTHROv5_11209	conserved hypothetical protein	0.701337	0.217914
ARTHROv5_11209_ARTHROv5_11210_ig	ARTHROv5_11209_ARTHROv5_11210_ig	---	0.0680848	0.912255
ARTHROv5_11210	ARTHROv5_11210	putative antitoxin of toxin-antitoxin stability system, YefM-like	0.482724	0.0399412
ARTHROv5_11211	ARTHROv5_11211	putative toxin of toxin-antitoxin stability system, YoeB-like	-0.193261	0.811835
ARTHROv5_11211_ARTHROv5_11212_ig	ARTHROv5_11211_ARTHROv5_11212_ig	---	-0.383323	0.0972493
ARTHROv5_11212	ARTHROv5_11212	putative transcriptional regulator, SpoVT/AbrB-like (fragment)	1.15932	0.00161356
ARTHROv5_11212_ARTHROv5_11213_ig	ARTHROv5_11212_ARTHROv5_11213_ig	---	1.44822	0.000707095
ARTHROv5_11213	ARTHROv5_11213	WD-40 repeat protein	1.28069	0.0141194
ARTHROv5_11213_ARTHROv5_11214_ig	ARTHROv5_11213_ARTHROv5_11214_ig	---	0.663239	0.0657626
ARTHROv5_11214	ARTHROv5_11214	conserved protein of unknown function	0.767172	0.142448
ARTHROv5_11214_ARTHROv5_11215_ig	ARTHROv5_11214_ARTHROv5_11215_ig	---	0.756526	0.041723
ARTHROv5_11215	ARTHROv5_11215	conserved protein of unknown function	0.492507	0.148716
ARTHROv5_11216	ARTHROv5_11216	hypothetical protein	0.269664	0.303441
ARTHROv5_11216_ARTHROv5_11217_ig	ARTHROv5_11216_ARTHROv5_11217_ig	---	0.421768	0.14842
ARTHROv5_11217	ARTHROv5_11217	conserved protein of unknown function	0.557104	0.0497938
ARTHROv5_11218	ARTHROv5_11218	conserved hypothetical protein	0.207671	0.300554
ARTHROv5_11219	ARTHROv5_11219	conserved hypothetical protein (fragment)	0.631562	0.0915756
ARTHROv5_11220	ARTHROv5_11220	hypothetical protein	0.73686	0.00616101
ARTHROv5_11221	ARTHROv5_11221	hypothetical protein	2.53134	0.000303868
ARTHROv5_11222	ARTHROv5_11222	putative transcriptional regulator, SpoVT/AbrB-like	1.50664	0.000218649
ARTHROv5_11223	ARTHROv5_11223	conserved hypothetical protein (fragment)	1.43307	0.00601735
ARTHROv5_11224	ARTHROv5_11224	Type II Site-specific DNA-methyltransferase (cytosine-N(4)-specific)	0.0638243	0.752364
ARTHROv5_11225	ARTHROv5_11225	Type II site-specific deoxyribonuclease	0.0925812	0.602504
ARTHROv5_11226	ARTHROv5_11226	hypothetical protein (secreted)	0.151571	0.567739
ARTHROv5_11226_ARTHROv5_11227_ig	ARTHROv5_11226_ARTHROv5_11227_ig	---	-0.115893	0.405385
ARTHROv5_11227	ARTHROv5_11227	conserved hypothetical protein	0.234315	0.132433
ARTHROv5_11227_ARTHROv5_11228_ig	ARTHROv5_11227_ARTHROv5_11228_ig	---	1.4636	0.00911041
ARTHROv5_11228	ARTHROv5_11228	putative ABC-type toluene transport system, permease component, YrbE-like	1.03601	0.000818108
ARTHROv5_11228_ARTHROv5_11229_ig	ARTHROv5_11228_ARTHROv5_11229_ig	---	0.553545	0.0528356
ARTHROv5_11229	ARTHROv5_11229	transposase, IS605 family (fragment)	0.404211	0.0127547
ARTHROv5_11229_ARTHROv5_11230_ig	ARTHROv5_11229_ARTHROv5_11230_ig	---	-0.194998	0.252598
ARTHROv5_11230	ARTHROv5_11230	conserved hypothetical protein	-0.719779	0.00334378
ARTHROv5_11231	ARTHROv5_11231	hypothetical protein	-0.848042	0.00565664
ARTHROv5_11231_ARTHROv5_11232_ig	ARTHROv5_11231_ARTHROv5_11232_ig	---	-0.503829	0.0288633
ARTHROv5_11232	ARTHROv5_11232	putative phycobilisome protein	-0.416528	0.210225
ARTHROv5_11233	ARTHROv5_11233	conserved hypothetical protein	-0.868389	0.00357863
ARTHROv5_11234	ARTHROv5_11234	conserved hypothetical protein	-0.36155	0.0638598
ARTHROv5_11235	fdx2	Ferredoxin (2Fe-2S)	-0.0686289	0.671462
ARTHROv5_11235_ARTHROv5_11236_ig	ARTHROv5_11235_ARTHROv5_11236_ig	---	-0.26248	0.0897215
ARTHROv5_11236	ARTHROv5_11236	hypothetical protein	-1.20494	0.00942582
ARTHROv5_11236_ARTHROv5_11238_ig	ARTHROv5_11236_ARTHROv5_11238_ig	---	-0.709202	0.0669742
ARTHROv5_11238	ARTHROv5_11238	Ser/thr protein kinase	-0.346674	0.0274304
ARTHROv5_11239	ARTHROv5_11239	hypothetical protein	0.0252797	0.857197
ARTHROv5_11239_ARTHROv5_11240_ig	ARTHROv5_11239_ARTHROv5_11240_ig	---	-0.67709	0.0465867
ARTHROv5_11240	ARTHROv5_11240	putative gas vesicle protein, GvpW-like	-0.292851	0.0781796
ARTHROv5_11240_ARTHROv5_11241_ig	ARTHROv5_11240_ARTHROv5_11241_ig	---	0.0353541	0.857963
ARTHROv5_11242	ARTHROv5_11242	transposase	-0.0145539	0.933651
ARTHROv5_11242_ARTHROv5_11243_ig	ARTHROv5_11242_ARTHROv5_11243_ig	---	0.0865221	0.547918
ARTHROv5_11243	ARTHROv5_11243	Putative Group II intron-encoded protein LtrA-like [Includes: Reverse-transcriptase ; RNA maturase ; HNH endonuclease] (fragment)	0.188596	0.230843
ARTHROv5_11244	ARTHROv5_11244	Putative Group II intron-encoded protein LtrA-like [Includes: Reverse-transcriptase ; RNA maturase ; HNH endonuclease] (fragment)	0.111677	0.398412
ARTHROv5_11244_ARTHROv5_11245_ig	ARTHROv5_11244_ARTHROv5_11245_ig	---	-0.0745485	0.521457
ARTHROv5_11248	ARTHROv5_11248	Group II intron maturase-specific domain protein	-0.072385	0.688945
ARTHROv5_11248_ARTHROv5_11249_ig	ARTHROv5_11248_ARTHROv5_11249_ig	---	0.646454	0.0637116
ARTHROv5_11249	ARTHROv5_11249	Putative Group II intron-encoded protein LtrA-like [Includes: Reverse-transcriptase ; RNA maturase ; HNH endonuclease] (fragment)	0.23493	0.396097
ARTHROv5_11249_ARTHROv5_misc_RNA_25_ig	ARTHROv5_11249_ARTHROv5_misc_RNA_25_ig	---	0.210094	0.206396
ARTHROv5_11250	ARTHROv5_11250	conserved protein of unknown function	-0.0440964	0.721495
ARTHROv5_11251	ARTHROv5_11251	conserved protein of unknown function	0.0824162	0.513643
ARTHROv5_11251_ARTHROv5_11252_ig	ARTHROv5_11251_ARTHROv5_11252_ig	---	0.35541	0.109601
ARTHROv5_11252	ARTHROv5_11252	conserved protein of unknown function	0.440877	0.236024
ARTHROv5_11252_ARTHROv5_11253_ig	ARTHROv5_11252_ARTHROv5_11253_ig	---	0.175885	0.69856
ARTHROv5_11263	ARTHROv5_11263	transposase	-0.0301869	0.823419
ARTHROv5_11263_ARTHROv5_misc_RNA_92_ig	ARTHROv5_11263_ARTHROv5_misc_RNA_92_ig	---	0.127186	0.494806
ARTHROv5_11264_ARTHROv5_misc_RNA_37_ig	ARTHROv5_11264_ARTHROv5_misc_RNA_37_ig	---	0.030526	0.798121
ARTHROv5_11265	ARTHROv5_11265	RNA-directed DNA polymerase	-0.170833	0.199686
ARTHROv5_11266	ARTHROv5_11266	Group II intron maturase-specific domain protein	-0.0765732	0.60773
ARTHROv5_11272_ARTHROv5_11273_ig	ARTHROv5_11272_ARTHROv5_11273_ig	---	-0.133915	0.662125
ARTHROv5_11274_ARTHROv5_11275_ig	ARTHROv5_11274_ARTHROv5_11275_ig	---	0.218731	0.230476
ARTHROv5_11275	intA9	site-specific recombinase (fragment)	-0.371568	0.0493675
ARTHROv5_11276	ARTHROv5_11276	hypothetical protein	0.290801	0.139331
ARTHROv5_11276_ARTHROv5_11277_ig	ARTHROv5_11276_ARTHROv5_11277_ig	---	0.315061	0.399706
ARTHROv5_11277	ARTHROv5_11277	hypothetical protein	0.142252	0.626531
ARTHROv5_11278	ARTHROv5_11278	putative transcriptional regulator, TetR family	0.496449	0.01513
ARTHROv5_11278_ARTHROv5_misc_RNA_61_ig	ARTHROv5_11278_ARTHROv5_misc_RNA_61_ig	---	0.241388	0.114315
ARTHROv5_11279	ARTHROv5_11279	putative metalloendopeptidase, M16 family	-0.661241	0.0179923
ARTHROv5_11280	ARTHROv5_11280	putative metalloendopeptidase, M16 family	-0.360994	0.0757015
ARTHROv5_11280_ARTHROv5_11281_ig	ARTHROv5_11280_ARTHROv5_11281_ig	---	0.200199	0.491738
ARTHROv5_11281	ARTHROv5_11281	conserved hypothetical protein (membrane)	0.320925	0.459984
ARTHROv5_11281_ARTHROv5_11282_ig	ARTHROv5_11281_ARTHROv5_11282_ig	---	1.80166	0.00145568
ARTHROv5_11282	ARTHROv5_11282	putative hydroxyacylglutathione hydrolase	2.06097	0.000161323
ARTHROv5_11282_ARTHROv5_11283_ig	ARTHROv5_11282_ARTHROv5_11283_ig	---	0.721158	0.555888
ARTHROv5_11283	ARTHROv5_11283	conserved hypothetical protein	0.484698	0.0266614
ARTHROv5_11283_ARTHROv5_11284_ig	ARTHROv5_11283_ARTHROv5_11284_ig	---	0.242823	0.2954
ARTHROv5_11284	ARTHROv5_11284	conserved protein of unknown function	0.191362	0.297809
ARTHROv5_11285	ARTHROv5_11285	conserved protein of unknown function	-0.0438872	0.764789
ARTHROv5_11285_ARTHROv5_11286_ig	ARTHROv5_11285_ARTHROv5_11286_ig	---	-0.178141	0.237667
ARTHROv5_11287	ARTHROv5_11287	hypothetical protein	0.110588	0.433625
ARTHROv5_11287_ARTHROv5_11288_ig	ARTHROv5_11287_ARTHROv5_11288_ig	---	0.196196	0.134739
ARTHROv5_11288	ARTHROv5_11288	transposase (fragment)	0.0794133	0.492977
ARTHROv5_11289	ARTHROv5_11289	conserved hypothetical protein	0.454996	0.0761721
ARTHROv5_11289_ARTHROv5_11290_ig	ARTHROv5_11289_ARTHROv5_11290_ig	---	-0.256549	0.144655
ARTHROv5_11290	speE	spermidine synthase (putrescine aminopropyltransferase)	-1.03726	0.00413127
ARTHROv5_11290_ARTHROv5_11291_ig	ARTHROv5_11290_ARTHROv5_11291_ig	---	0.419338	0.323496
ARTHROv5_11291	ilvK	Branched-chain-amino-acid aminotransferase 2	0.550366	0.111901
ARTHROv5_11291_ARTHROv5_11292_ig	ARTHROv5_11291_ARTHROv5_11292_ig	---	0.306958	0.710379
ARTHROv5_11292	ARTHROv5_11292	conserved hypothetical protein	0.185552	0.208784
ARTHROv5_11293	dapF	Diaminopimelate epimerase	0.0807069	0.673127
ARTHROv5_11294	ARTHROv5_11294	conserved hypothetical protein	0.159563	0.449132
ARTHROv5_11294_ARTHROv5_11295_ig	ARTHROv5_11294_ARTHROv5_11295_ig	---	0.00254425	0.987499
ARTHROv5_11295	ARTHROv5_11295	putative PAS/PAC sensor protein	-0.049603	0.81815
ARTHROv5_11296	ARTHROv5_11296	putative sensor with HAMP domain	0.216747	0.388266
ARTHROv5_11296_ARTHROv5_11297_ig	ARTHROv5_11296_ARTHROv5_11297_ig	---	0.245925	0.105626
ARTHROv5_11300_ARTHROv5_11301_ig	ARTHROv5_11300_ARTHROv5_11301_ig	---	0.218171	0.162208
ARTHROv5_11301	ARTHROv5_11301	putative glutaminase (fragment)	0.0670702	0.727838
ARTHROv5_11305	ARTHROv5_11305	conserved protein of unknown function	-0.369832	0.0822407
ARTHROv5_11306	ARTHROv5_11306	conserved protein of unknown function	0.69198	0.00596086
ARTHROv5_11307_ARTHROv5_11308_ig	ARTHROv5_11307_ARTHROv5_11308_ig	---	-0.0968252	0.665874
ARTHROv5_11308	ARTHROv5_11308	putative Sodium-dependent phosphate transport protein, NptA-like	1.07327	0.00802852
ARTHROv5_11309	ARTHROv5_11309	hypothetical protein	0.0645418	0.941151
ARTHROv5_11310	ARTHROv5_11310	conserved protein of unknown function	-0.134387	0.859649
ARTHROv5_11311	hsdS	TypeI R-M system restriction enzyme subunit S (fragment), Type I restriction enzyme Asp8005ORF3801 S protein (Asp8005ORF801 S protein fragment) Subunit S of type I restriction-modification system (fragment)	0.325976	0.312752
ARTHROv5_11311_ARTHROv5_11312_ig	ARTHROv5_11311_ARTHROv5_11312_ig	---	0.0655877	0.901813
ARTHROv5_11312	ARTHROv5_11312	putative plasmid maintenance system antidote protein, HigA-like	-0.255437	0.680429
ARTHROv5_11312_ARTHROv5_tRNA38_ig	ARTHROv5_11312_ARTHROv5_tRNA38_ig	---	0.391778	0.0875559
ARTHROv5_11313	folB	putative dihydroneopterin aldolase	0.199416	0.172654
ARTHROv5_11314	ARTHROv5_11314	conserved protein of unknown function	-0.95957	0.00303757
ARTHROv5_11314_ARTHROv5_11315_ig	ARTHROv5_11314_ARTHROv5_11315_ig	---	-0.58585	0.0949641
ARTHROv5_11315	ARTHROv5_11315	conserved hypothetical protein (secreted)	0.0436955	0.800509
ARTHROv5_11315_ARTHROv5_11316_ig	ARTHROv5_11315_ARTHROv5_11316_ig	---	0.146301	0.515798
ARTHROv5_11316	ARTHROv5_11316	putative transketolase	-0.777837	0.00147765
ARTHROv5_11316_ARTHROv5_11317_ig	ARTHROv5_11316_ARTHROv5_11317_ig	---	-1.14881	0.0447638
ARTHROv5_11317	ARTHROv5_11317	transposase, IS605 family, OrfB	-0.509502	0.00605758
ARTHROv5_11317_ARTHROv5_11318_ig	ARTHROv5_11317_ARTHROv5_11318_ig	---	0.256348	0.58553
ARTHROv5_11318	ARTHROv5_11318	putative lipase, G-D-S-L family (fragment)	-0.24176	0.479855
ARTHROv5_11318_ARTHROv5_11319_ig	ARTHROv5_11318_ARTHROv5_11319_ig	---	0.122716	0.760624
ARTHROv5_11319	ARTHROv5_11319	conserved hypothetical protein	0.140835	0.298786
ARTHROv5_11320	ARTHROv5_11320	conserved protein of unknown function	0.139302	0.415381
ARTHROv5_11320_ARTHROv5_11321_ig	ARTHROv5_11320_ARTHROv5_11321_ig	---	-0.347322	0.443251
ARTHROv5_11321	ARTHROv5_11321	serine esterase	-0.687784	0.0177323
ARTHROv5_11321_ARTHROv5_11322_ig	ARTHROv5_11321_ARTHROv5_11322_ig	---	0.113466	0.464164
ARTHROv5_11322	ARTHROv5_11322	putative transposase, IS200/IS605 family (fragment)	-0.0570348	0.641782
ARTHROv5_11324	ARTHROv5_11324	transposase	-0.215522	0.160158
ARTHROv5_11325	ARTHROv5_11325	conserved hypothetical protein	-0.374889	0.016961
ARTHROv5_11325_ARTHROv5_11326_ig	ARTHROv5_11325_ARTHROv5_11326_ig	---	-1.57084	0.00531928
ARTHROv5_11326	coaBC	Coenzyme A biosynthesis bifunctional protein CoaBC [Includes: Phosphopantothenoylcysteine decarboxylase ; Phosphopantothenate--cysteine ligase]	-0.59913	0.0162203
ARTHROv5_11326_ARTHROv5_11327_ig	ARTHROv5_11326_ARTHROv5_11327_ig	---	-0.0394874	0.941596
ARTHROv5_11327	chlP	Geranylgeranyl hydrogenase	-0.738808	0.00134157
ARTHROv5_11327_ARTHROv5_11328_ig	ARTHROv5_11327_ARTHROv5_11328_ig	---	-0.132046	0.78604
ARTHROv5_11328	ARTHROv5_11328	conserved hypothetical protein	-2.10051	0.00165618
ARTHROv5_11329	ARTHROv5_11329	conserved hypothetical protein (membrane)	-0.899782	0.028011
ARTHROv5_11330	ARTHROv5_11330	hypothetical protein (secreted)	1.1986	0.00168602
ARTHROv5_11330_ARTHROv5_11331_ig	ARTHROv5_11330_ARTHROv5_11331_ig	---	1.04404	0.0608258
ARTHROv5_11331	cysE2	Serine acetyltransferase	0.714033	0.00193561
ARTHROv5_11332	ARTHROv5_11332	putative Pyridoxal 5'-phosphate synthase, PdxH-like	0.218722	0.136335
ARTHROv5_11333	ARTHROv5_11333	conserved hypothetical protein	0.501575	0.0274384
ARTHROv5_11334	ARTHROv5_11334	hypothetical protein	-0.466263	0.711226
ARTHROv5_11334_ARTHROv5_misc_RNA_123_ig	ARTHROv5_11334_ARTHROv5_misc_RNA_123_ig	---	0.234419	0.481735
ARTHROv5_11335	ARTHROv5_11335	transposase, IS605 family, OrfB	-0.176951	0.141235
ARTHROv5_11336	ARTHROv5_11336	conserved hypothetical protein	-1.04791	0.000934263
ARTHROv5_11336_ARTHROv5_11337_ig	ARTHROv5_11336_ARTHROv5_11337_ig	---	-0.877411	0.588027
ARTHROv5_11337	ARTHROv5_11337	TPR domain protein (modular protein)	-0.152327	0.439217
ARTHROv5_11337_ARTHROv5_11338_ig	ARTHROv5_11337_ARTHROv5_11338_ig	---	-0.384794	0.0443121
ARTHROv5_11338	ARTHROv5_11338	Peptidase C14 caspase catalytic subunit p20	-0.868324	0.00800588
ARTHROv5_11338_ARTHROv5_11339_ig	ARTHROv5_11338_ARTHROv5_11339_ig	---	0.656755	0.0506911
ARTHROv5_11339	ARTHROv5_11339	conserved hypothetical protein	0.245095	0.154405
ARTHROv5_11340	ARTHROv5_11340	Putative metalloprotease	0.150931	0.23924
ARTHROv5_11340_ARTHROv5_11341_ig	ARTHROv5_11340_ARTHROv5_11341_ig	---	0.464063	0.0167916
ARTHROv5_11341	dgkA	diacylglycerol kinase	0.360511	0.0403571
ARTHROv5_11342	trpG	Anthranilate synthase component 2	0.656297	0.00855915
ARTHROv5_11343	ARTHROv5_11343	conserved exported protein of unknown function	0.859884	0.00895366
ARTHROv5_11343_ARTHROv5_11344_ig	ARTHROv5_11343_ARTHROv5_11344_ig	---	0.067574	0.794403
ARTHROv5_11344	ARTHROv5_11344	conserved protein of unknown function	0.00355876	0.993313
ARTHROv5_11344_ARTHROv5_11345_ig	ARTHROv5_11344_ARTHROv5_11345_ig	---	-0.134142	0.481735
ARTHROv5_11345	ARTHROv5_11345	conserved protein of unknown function	-0.11649	0.560144
ARTHROv5_11345_ARTHROv5_11346_ig	ARTHROv5_11345_ARTHROv5_11346_ig	---	0.191731	0.542662
ARTHROv5_11346	ARTHROv5_11346	conserved hypothetical protein	0.833392	0.00485954
ARTHROv5_11347	ARTHROv5_11347	conserved hypothetical protein	0.0988914	0.566404
ARTHROv5_11348	galE	UDP-glucose 4-epimerase	0.425255	0.0558659
ARTHROv5_11349	ARTHROv5_11349	conserved protein of unknown function	0.603611	0.0120074
ARTHROv5_11350	ARTHROv5_11350	Multi-sensor hybrid histidine kinase	-0.455602	0.0329875
ARTHROv5_11350_ARTHROv5_11351_ig	ARTHROv5_11350_ARTHROv5_11351_ig	---	0.0451102	0.929738
ARTHROv5_11351	ARTHROv5_11351	putative Hemolysin-type calcium-binding toxin, RTX-like, Putative oscillin	0.130818	0.282311
ARTHROv5_11351_ARTHROv5_11352_ig	ARTHROv5_11351_ARTHROv5_11352_ig	---	0.676427	0.0414565
ARTHROv5_11352	ARTHROv5_11352	hypothetical protein	0.474373	0.0141414
ARTHROv5_11352_ARTHROv5_11353_ig	ARTHROv5_11352_ARTHROv5_11353_ig	---	0.0982522	0.560231
ARTHROv5_11353	ARTHROv5_11353	transposase, IS605 family (fragment)	0.151485	0.282848
ARTHROv5_11353_ARTHROv5_11354_ig	ARTHROv5_11353_ARTHROv5_11354_ig	---	0.112045	0.348925
ARTHROv5_11354	ARTHROv5_11354	conserved hypothetical protein (secreted)	-0.114213	0.47346
ARTHROv5_11354_ARTHROv5_11355_ig	ARTHROv5_11354_ARTHROv5_11355_ig	---	-0.0898633	0.744677
ARTHROv5_11355	ARTHROv5_11355	hypothetical protein	-0.193493	0.534668
ARTHROv5_11356	ureG	Urease accessory protein UreG	-0.0735084	0.799573
ARTHROv5_11357	cobO	Cob(I)yrinic acid a,c-diamide adenosyltransferase	0.275171	0.319728
ARTHROv5_11357_ARTHROv5_11358_ig	ARTHROv5_11357_ARTHROv5_11358_ig	---	1.19849	0.163798
ARTHROv5_11358	moeA	Molybdopterin molybdenumtransferase	0.54183	0.0105057
ARTHROv5_11358_ARTHROv5_11359_ig	ARTHROv5_11358_ARTHROv5_11359_ig	---	0.00246531	0.991263
ARTHROv5_11359	ARTHROv5_11359	putative two-component system transcriptional regulator, LuxR family	0.369376	0.162022
ARTHROv5_11359_ARTHROv5_11360_ig	ARTHROv5_11359_ARTHROv5_11360_ig	---	0.93994	0.166661
ARTHROv5_11360	pck	phosphoenolpyruvate carboxykinase	0.700194	0.0222852
ARTHROv5_11360_ARTHROv5_11361_ig	ARTHROv5_11360_ARTHROv5_11361_ig	---	0.064875	0.936648
ARTHROv5_11361	ARTHROv5_11361	protein of unknown function	0.685397	0.00704327
ARTHROv5_11361_ARTHROv5_11362_ig	ARTHROv5_11361_ARTHROv5_11362_ig	---	0.581639	0.0286598
ARTHROv5_11362	ARTHROv5_11362	conserved protein of unknown function	-0.201424	0.32931
ARTHROv5_11362_ARTHROv5_11363_ig	ARTHROv5_11362_ARTHROv5_11363_ig	---	-0.721807	0.161246
ARTHROv5_11363	icd	Isocitrate dehydrogenase [NADP]	0.881552	0.00188154
ARTHROv5_11363_ARTHROv5_11364_ig	ARTHROv5_11363_ARTHROv5_11364_ig	---	0.73906	0.00196771
ARTHROv5_11364	recA	DNA strand exchange and recombination protein with protease and nuclease activity	0.110985	0.373137
ARTHROv5_11364_ARTHROv5_11365_ig	ARTHROv5_11364_ARTHROv5_11365_ig	---	0.0117606	0.937593
ARTHROv5_11365	ARTHROv5_11365	Alpha/beta hydrolase fold protein	-0.379872	0.0169442
ARTHROv5_11365_ARTHROv5_misc_RNA_102_ig	ARTHROv5_11365_ARTHROv5_misc_RNA_102_ig	---	-0.144575	0.301152
ARTHROv5_11366	ARTHROv5_11366	conserved protein of unknown function	0.172437	0.460569
ARTHROv5_11366_ARTHROv5_11367_ig	ARTHROv5_11366_ARTHROv5_11367_ig	---	0.0516801	0.790146
ARTHROv5_11367	ARTHROv5_11367	RNA-directed DNA polymerase	-0.0902786	0.439662
ARTHROv5_11367_ARTHROv5_11368_ig	ARTHROv5_11367_ARTHROv5_11368_ig	---	0.084018	0.453318
ARTHROv5_11368	ARTHROv5_11368	conserved protein of unknown function	0.124495	0.323319
ARTHROv5_11368_ARTHROv5_11369_ig	ARTHROv5_11368_ARTHROv5_11369_ig	---	0.271726	0.0531449
ARTHROv5_11369	ARTHROv5_11369	conserved protein of unknown function	-0.438772	0.0151735
ARTHROv5_11369_ARTHROv5_11370_ig	ARTHROv5_11369_ARTHROv5_11370_ig	---	-0.220558	0.158674
ARTHROv5_11370	ARTHROv5_11370	conserved protein of unknown function	-0.12416	0.60806
ARTHROv5_11371	ARTHROv5_11371	Group II intron maturase-specific domain protein	0.3495	0.120113
ARTHROv5_11371_ARTHROv5_11372_ig	ARTHROv5_11371_ARTHROv5_11372_ig	---	0.463045	0.042768
ARTHROv5_11372	ARTHROv5_11372	N-acetylglucosamine-6-phosphate deacetylase	1.29773	0.0197857
ARTHROv5_11373	ARTHROv5_11373	PilT protein domain protein	0.244386	0.106282
ARTHROv5_11374	ARTHROv5_11374	conserved protein of unknown function	0.388351	0.047832
ARTHROv5_11374_ARTHROv5_11375_ig	ARTHROv5_11374_ARTHROv5_11375_ig	---	1.23122	0.000647358
ARTHROv5_11375	purE	N5-carboxyaminoimidazole ribonucleotide mutase	0.85169	0.00619476
ARTHROv5_11375_ARTHROv5_11376_ig	ARTHROv5_11375_ARTHROv5_11376_ig	---	1.58927	0.000206727
ARTHROv5_11376	amt1	Ammonium/methylammonium permease	0.948395	0.0010309
ARTHROv5_11376_ARTHROv5_11377_ig	ARTHROv5_11376_ARTHROv5_11377_ig	---	1.51363	0.0161962
ARTHROv5_11377	ARTHROv5_11377	Lipolytic protein	0.612265	0.00733622
ARTHROv5_11377_ARTHROv5_11378_ig	ARTHROv5_11377_ARTHROv5_11378_ig	---	0.306507	0.173357
ARTHROv5_11378	ARTHROv5_11378	conserved exported protein of unknown function	0.415593	0.0438444
ARTHROv5_11378_ARTHROv5_11379_ig	ARTHROv5_11378_ARTHROv5_11379_ig	---	-0.0551538	0.918061
ARTHROv5_11379	ARTHROv5_11379	Pentapeptide repeat protein	0.0484536	0.690694
ARTHROv5_11380	ARTHROv5_11380	conserved protein of unknown function	-1.22917	0.00727397
ARTHROv5_11380_ARTHROv5_11381_ig	ARTHROv5_11380_ARTHROv5_11381_ig	---	-0.52152	0.0777359
ARTHROv5_11381	hemB	Delta-aminolevulinic acid dehydratase	0.0496861	0.911848
ARTHROv5_11381_ARTHROv5_11382_ig	ARTHROv5_11381_ARTHROv5_11382_ig	---	0.00743183	0.968114
ARTHROv5_11382	ARTHROv5_11382	conserved protein of unknown function	-0.303602	0.0699167
ARTHROv5_11383	ARTHROv5_11383	conserved protein of unknown function	-0.287296	0.0912078
ARTHROv5_11384	hisI	Phosphoribosyl-AMP cyclohydrolase	-0.153922	0.263159
ARTHROv5_11385	cysS	Cysteine--tRNA ligase	0.385237	0.042312
ARTHROv5_11386	ARTHROv5_11386	conserved hypothetical protein	0.379048	0.0512484
ARTHROv5_11386_ARTHROv5_11387_ig	ARTHROv5_11386_ARTHROv5_11387_ig	---	-0.0522791	0.834684
ARTHROv5_11387	ARTHROv5_11387	conserved protein of unknown function	0.111902	0.537865
ARTHROv5_11389	ARTHROv5_11389	conserved protein of unknown function	-0.322006	0.233583
ARTHROv5_11389_ARTHROv5_11390_ig	ARTHROv5_11389_ARTHROv5_11390_ig	---	-0.411949	0.0872993
ARTHROv5_11390	ARTHROv5_11390	conserved hypothetical protein	0.171161	0.506963
ARTHROv5_11391	ARTHROv5_11391	putative Na+ dependent nucleoside permease	-0.481948	0.0461372
ARTHROv5_11391_ARTHROv5_11392_ig	ARTHROv5_11391_ARTHROv5_11392_ig	---	-0.150579	0.809305
ARTHROv5_11392	ARTHROv5_11392	conserved hypothetical protein	1.17407	0.00188714
ARTHROv5_11392_ARTHROv5_11393_ig	ARTHROv5_11392_ARTHROv5_11393_ig	---	0.826624	0.00176759
ARTHROv5_11393	ARTHROv5_11393	conserved hypothetical protein	0.769026	0.00575915
ARTHROv5_11393_ARTHROv5_11394_ig	ARTHROv5_11393_ARTHROv5_11394_ig	---	0.192482	0.351357
ARTHROv5_11394	ARTHROv5_11394	conserved hypothetical protein (membrane)	-2.25938	0.00341175
ARTHROv5_11394_ARTHROv5_11395_ig	ARTHROv5_11394_ARTHROv5_11395_ig	---	-2.96798	0.0331438
ARTHROv5_11395	ribH	6,7-dimethyl-8-ribityllumazine synthase	-1.81703	0.000617733
ARTHROv5_11395_ARTHROv5_11396_ig	ARTHROv5_11395_ARTHROv5_11396_ig	---	-1.21747	0.00135138
[truncated: 6,996 more rows]
