# Supplementary material for: Trade-Off between Growth and Carbohydrate Accumulation in Nutrient-Limited Arthrospira sp. PCC 8005 Studied by Integrating Transcriptomic and Proteomic Approaches
Source: PLoS One. 2015 Jul 21;10(7):e0132461. doi: 10.1371/journal.pone.0132461 (PMC4509649; doi:10.1371/journal.pone.0132461)
Supplement: S2 Table — The fold changes are the ratios of the abundance of proteins between nitrogen limited and control. Data presented here are issued from three independent biological replicates. (XLSX) [file pone.0132461.s002.xlsx]

## Sheet: proteomics data
ID_PROT		Gene name	Product	Biological process	Peptides	t-test	Fold-change
ARTHROv5_11282	ID:18394701		putative hydroxyacylglutathione hydrolase	General function prediction only	3	0.000449257	5.39305
ARTHROv5_40488	ID:18397182		ABC transport system, periplasmic component, TauA-like	Inorganic ion transport and metabolism	4	0.0048026	3.86391
ARTHROv5_10436	ID:18393855	pps	phosphoenolpyruvate synthase	Carbohydrate transport and metabolism	38	4.97356e-07	3.47288
ARTHROv5_61117	ID:18399622	maeB	Malate dehydrogenase (oxaloacetate-decarboxylating) (NADP(+))	Energy production and conversion	4	0.000435895	3.3436
ARTHROv5_60175	ID:18398680	nthA1	Nitrile hydratase alpha subunit	Nitrogen compound metabolism	2	0.00118971	3.23123
ARTHROv5_61111	ID:18399616		Unknown	Fonction unknown	2	0.000254895	3.20637
ARTHROv5_11880	ID:18395299	cynS	cyanase	Inorganic ion transport and metabolism	5	0.0291452	2.94334
ARTHROv5_60400	ID:18398906	potG	putrescine transporter subunit: ATP-binding component of ABC superfamily	Amino acid transport and metabolism	3	0.00014855	2.69647
ARTHROv5_60176	ID:18398681	nthB2	Nitrile hydratase beta subunit	Nitrogen compound metabolism	3	0.000533151	2.60518
ARTHROv5_10389	ID:18393808	aapJ	General L-amino acid-binding periplasmic protein AapJ	Amino acid transport and metabolism	17	9.96596e-05	2.59881
ARTHROv5_10488	ID:18393907		putative ABC-type branched-chain amino acid transport systems, periplasmic component, LivJ-like	Amino acid transport and metabolism	14	0.00017763	2.58315
ARTHROv5_10269	ID:18393688	pntAA	pyridine nucleotide transhydrogenase, alpha subunit, soluble domain	Energy production and conversion	9	0.000104644	2.53615
ARTHROv5_20218	ID:18395777	fmdA	formamidase (formamide amidohydrolase)	Energy production and conversion	10	0.000362094	2.52645
ARTHROv5_10682	ID:18394101		conserved hypothetical protein	Fonction unknown	2	8.11832e-05	2.47997
ARTHROv5_11794	ID:18395213		putative phytoene dehydrogenase / carotene isomerase	Secondary metabolites biosynthesis, transport and catabolism	4	0.0027519	2.40879
ARTHROv5_60694	ID:18399199		Unknown	Fonction unknown	5	0.00460913	2.36921
ARTHROv5_40477	ID:18397171		Unknown	Fonction unknown	4	0.00636118	2.35758
ARTHROv5_40065	ID:18396759		Unknown	Fonction unknown	3	0.0432103	2.29785
ARTHROv5_11456	ID:18394875	gap1	Glyceraldehyde-3-phosphate dehydrogenase 1	Carbohydrate transport and metabolism	21	0.000126288	2.29231
ARTHROv5_61150	ID:18399655		putative haemolysin-type calcium-binding toxin, RTX-like (expressed)	Secondary metabolites biosynthesis, transport and catabolism	5	0.0132616	2.16894
ARTHROv5_60899	ID:18399404	pflB	pyruvate formate lyase I	Energy production and conversion	16	0.00292063	2.16865
ARTHROv5_60546	ID:18399051		Unknown	conserved hypothetical protein	5	0.023828	2.16299
ARTHROv5_30419	ID:18396248	adhE	fused acetaldehyde-CoA dehydrogenase ; iron-dependent alcohol dehydrogenase ; pyruvate-formate lyase deactivase	Energy production and conversion	19	0.000399611	2.10996
ARTHROv5_10267	ID:18393686	pntB	pyridine nucleotide transhydrogenase, beta subunit	Energy production and conversion	6	0.00754463	2.10486
ARTHROv5_60743	ID:18399248		conserved hypothetical protein	Cell motility	9	0.0170761	2.10078
ARTHROv5_12133	ID:18395552	glnA	glutamine synthetase	Amino acid transport and metabolism	21	0.00039586	2.08721
ARTHROv5_41229	ID:18397923		conserved hypothetical protein	Secondary metabolites biosynthesis, transport and catabolism	6	0.0402504	2.04711
ARTHROv5_60256	ID:18398761	hup3	Histone-like bacterial DNA-binding protein, HU-like	Replication, recombination and repair	3	0.00467077	2.03952
ARTHROv5_11571	ID:18394990		conserved hypothetical protein (secreted)	Posttranslational modification, protein turnover, chaperones	5	0.0228044	2.03055
ARTHROv5_40314	ID:18397008	carA	Carbamoyl-phosphate synthase small chain	Amino acid transport and metabolism	2	0.0115315	2.02934
ARTHROv5_20209	ID:18395768		conserved protein of Unknown function	Function unknown	6	0.00869009	2.0271
ARTHROv5_11747	ID:18395166		Unknown	conserved protein of Fonction unknown	3	0.0486334	2.00127
ARTHROv5_50271	ID:18398407	glnB	protein P-II	Amino acid transport and metabolism	7	0.00752906	2.00001
ARTHROv5_60390	ID:18398895		Unknown	Fonction unknown	2	0.0297831	1.94983
ARTHROv5_41295	ID:18397989	hoxF	NAD-reducing hydrogenase diaphorase moiety large subunit	Energy production and conversion	2	0.00104597	1.93914
ARTHROv5_10209	ID:18393628		Unknown	Fonction unknown	11	0.00366479	1.93627
ARTHROv5_20225	ID:18395784		Glycosyl transferase, family 2	Cell wall/membrane/envelope biogenesis	2	0.0164624	1.93599
ARTHROv5_12014	ID:18395433	minE	Septum formation topological specificity factor MinE	Cell cycle control, cell division, chromosome partitioning	3	0.0156603	1.9243
ARTHROv5_11351	ID:18394770		putative Hemolysin-type calcium-binding toxin, RTX-like, Putative oscillin	Secondary metabolites biosynthesis, transport and catabolism	4	0.0483576	1.90516
ARTHROv5_40886	ID:18397580		Unknown	conserved hypothetical protein	5	0.0485219	1.89448
ARTHROv5_11636	ID:18395055	argD	bifunctional Acetylornithine aminotransferase and Succinyldiaminopimelate transaminase	Amino acid transport and metabolism	4	0.00130514	1.89327
ARTHROv5_30650	ID:18396479	ilvH	Acetolactate synthase small subunit	Amino acid transport and metabolism	3	0.0305676	1.8853
ARTHROv5_30069	ID:18395898	ureA	Urease subunit gamma (Urea amidohydrolase subunit gamma)	Amino acid transport and metabolism	3	0.0173886	1.87879
ARTHROv5_60676	ID:18399181	terD	tellurium resistance protein	Signal transduction mechanisms	8	0.00534569	1.86576
ARTHROv5_60705	ID:18399210	trpD	Anthranilate phosphoribosyltransferase	Amino acid transport and metabolism	5	0.000382823	1.8467
ARTHROv5_10688	ID:18394107	gltA	citrate synthase	Energy production and conversion	3	0.013888	1.83303
ARTHROv5_10213	ID:18393632		Unknown	Fonction unknown	4	0.0248284	1.82579
ARTHROv5_10501	ID:18393920		Unknown	Fonction unknown	2	0.0121797	1.82443
ARTHROv5_30238	ID:18396067		conserved hypothetical protein	Function unknown	5	0.0348758	1.7817
ARTHROv5_60275	ID:18398780		conserved exported protein of Unknown function. LemA family protein	Function unknown	5	0.0011455	1.77451
ARTHROv5_30705	ID:18396534	rbp1	Glycine-rich RNA-binding protein, rbp-like	General function prediction only	8	0.0185852	1.77261
ARTHROv5_41329	ID:18398023		putative ATPase, AAA family	Posttranslational modification, protein turnover, chaperones	17	0.00423671	1.75087
ARTHROv5_61061	ID:18399566	pstS	Phosphate ABC transporter, periplasmic phosphate-binding protein	Inorganic ion transport and metabolism	5	0.000274126	1.72707
ARTHROv5_11816	ID:18395235		Type II secretion system protein E	Cell motility	3	0.0130006	1.7262
ARTHROv5_60654	ID:18399159		Unknown	Function unknown	3	0.0118884	1.72525
ARTHROv5_40073	ID:18396767		Unknown	Function unknown	2	0.0146491	1.72445
ARTHROv5_11032	ID:18394451	rplD	50S ribosomal subunit protein L4	Translation, ribosomal structure and biogenesis	8	0.0465074	1.71047
ARTHROv5_10008	ID:18393427		putative UDP-N-acetyl-D-mannosamine 6-dehydrogenase	Cell wall/membrane/envelope biogenesis	5	0.0425347	1.70388
ARTHROv5_11455	ID:18394874	pfkA2	6-phosphofructokinase I	Carbohydrate transport and metabolism	5	0.0477118	1.70088
ARTHROv5_11670	ID:18395089	gmd	GDP-D-mannose dehydratase, NAD(P)-binding	Cell wall/membrane/envelope biogenesis	2	0.0399373	1.70029
ARTHROv5_61109	ID:18399614	opcA	Putative glucose 6-phosphate dehydrogenase assembly protein	Carbohydrate transport and metabolism	7	0.00345699	1.70011
ARTHROv5_10529	ID:18393948		Unknown	Function unknown	2	0.00774497	1.69807
ARTHROv5_41299	ID:18397993	hoxH	NAD-reducing hydrogenase, large subunit	Energy production and conversion	3	0.0412282	1.69304
ARTHROv5_10622	ID:18394041	purQ	Phosphoribosylformylglycinamidine synthase, PurQ subunit	Nucleotide transport and metabolism	2	0.00114056	1.69216
ARTHROv5_40600	ID:18397294		Unknown	hypothetical protein	4	0.0384288	1.68395
ARTHROv5_30015	ID:18395844		Unknown	Function unknown	6	0.0030759	1.66278
ARTHROv5_40621	ID:18397315	nrtA	ABC Nitrate transport system, periplasmic component NrtA	Inorganic ion transport and metabolism	13	0.00051946	1.65919
ARTHROv5_60069	ID:18398574		putative Signal Transduction Histidine Kinase	Cell motility	5	0.00770701	1.65875
ARTHROv5_11119	ID:18394538	eno	enolase	Carbohydrate transport and metabolism	24	0.000201562	1.65495
ARTHROv5_61217	ID:18399722		conserved protein of Unknown function	Secondary metabolites biosynthesis, transport and catabolism	3	0.0322657	1.65203
ARTHROv5_40575	ID:18397269		Unknown	Function unknown	2	0.00677481	1.65121
ARTHROv5_12086	ID:18395505	argF	Ornithine carbamoyltransferase	Amino acid transport and metabolism	4	0.00356502	1.64567
ARTHROv5_30805	ID:18396634		pentapeptide repeat-containing protein	Function unknown	5	0.0180948	1.64353
ARTHROv5_50152	ID:18398288		Unknown	Function unknown	3	0.00273596	1.63581
ARTHROv5_40655	ID:18397349		Unknown	Function unknown	2	0.00725818	1.62946
ARTHROv5_11363	ID:18394782	icd	Isocitrate dehydrogenase [NADP]	Energy production and conversion	15	0.0117016	1.62706
ARTHROv5_40573	ID:18397267		Unknown	Function unknown	23	0.00112042	1.62148
ARTHROv5_10648	ID:18394067		Universal stress protein, UspA-like	Signal transduction mechanisms	2	0.0166909	1.61528
ARTHROv5_10757	ID:18394176		putative Redox-active disulfide protein 2	Energy production and conversion	2	0.0424478	1.59802
ARTHROv5_40406	ID:18397100		Unknown	conserved hypothetical protein (secreted) (fragment)	2	0.0405047	1.5962
ARTHROv5_61184	ID:18399689		putative ferredoxin (fragment)	Energy production and conversion	3	0.0374126	1.58915
ARTHROv5_50171	ID:18398307	pgl	6-phosphogluconolactonase (6PGL)	Carbohydrate transport and metabolism	4	0.000524191	1.58902
ARTHROv5_41424	ID:18398118		putative DnaJ-class molecular chaperone	Posttranslational modification, protein turnover, chaperones	6	0.00377388	1.58097
ARTHROv5_50173	ID:18398309		Unknown	Function unknown	7	0.0250491	1.57881
ARTHROv5_40890	ID:18397584		Unknown	Function unknown	4	0.0237459	1.57407
ARTHROv5_11492	ID:18394911		conserved hypothetical protein	Cell cycle control, cell division, chromosome partitioning	3	0.00489249	1.56706
ARTHROv5_30329	ID:18396158	pphA	PP2C/PPM-type Ser/thr protein phosphatase	Signal transduction mechanisms	12	0.0407604	1.56558
ARTHROv5_40020	ID:18396714		alkyl hydroperoxide reductase/ thiol specific antioxidant/ Mal allergen	Energy production and conversion	3	0.0288683	1.56235
ARTHROv5_11073	ID:18394492	glgC	glucose-1-phosphate adenylyltransferase	Carbohydrate transport and metabolism	16	0.00606125	1.55408
ARTHROv5_60801	ID:18399306	argJ	Arginine biosynthesis bifunctional protein argJ [Includes: Glutamate N-acetyltransferase (Ornithine acetyltransferase) (Ornithine transacetylase) (OATase); Amino-acid acetyltransferase (N-acetylglutamate synthase) (AGS)]	Amino acid transport and metabolism	3	0.00198309	1.55159
ARTHROv5_40538	ID:18397232		putative UDP-glucuronate decarboxylase	Carbohydrate transport and metabolism	6	0.0187963	1.54799
ARTHROv5_30181	ID:18396010		Unknown	Function unknown	2	0.00122698	1.5434
ARTHROv5_40761	ID:18397455		Unknown	Function unknown	7	0.036583	1.54066
ARTHROv5_10798	ID:18394217		conserved hypothetical protein	Replication, recombination and repair	2	0.0461272	1.54035
ARTHROv5_11315	ID:18394734		Unknown	Function unknown	3	0.0381442	1.53601
ARTHROv5_40263	ID:18396957	accB	Biotin carboxyl carrier protein of acetyl-CoA carboxylase	Lipid transport and metabolism	6	0.032985	1.53261
ARTHROv5_10662	ID:18394081		Pentapeptide repeat protein	Function unknown	6	0.00659311	1.53081
ARTHROv5_10309	ID:18393728	cysK3	Cysteine synthase	Amino acid transport and metabolism	5	0.000942951	1.52199
ARTHROv5_30436	ID:18396265	argG	Argininosuccinate synthase	Amino acid transport and metabolism	5	0.010239	1.52071
ARTHROv5_40023	ID:18396717	chlP	geranylgeranyl reductase	Energy production and conversion	3	0.00427354	1.51789
ARTHROv5_11016	ID:18394435	ilvY	Acetolactate synthase	Amino acid transport and metabolism	7	0.0109997	1.50265
ARTHROv5_40051	ID:18396745		two-component response regulator	Transcription	2	0.0194439	1.49663
ARTHROv5_12037	ID:18395456	gvpC	Gas vesicle structural protein GvpC	Cell cycle control, cell division, chromosome partitioning	10	0.0210805	1.49658
ARTHROv5_60117	ID:18398622	carB	Carbamoyl-phosphate synthase large chain	Amino acid transport and metabolism	14	0.000473094	1.4922
ARTHROv5_11500	ID:18394919	hup2	Histone-like bacterial DNA-binding protein, HU-like	Replication, recombination and repair	8	0.0249271	1.48029
ARTHROv5_10664	ID:18394083		Peptidase C14, caspase catalytic subunit p20	General function prediction only	3	0.000155627	1.47283
ARTHROv5_12042	ID:18395461		Unknown	#N/A	3	0.0142337	1.47074
ARTHROv5_61120	ID:18399625		Unknown	conserved hypothetical protein	6	0.0460863	1.46853
ARTHROv5_40290	ID:18396984	tpiA	triosephosphate isomerase	Carbohydrate transport and metabolism	10	0.0367675	1.4666
ARTHROv5_40384	ID:18397078		conserved hypothetical protein (secreted)	Function unknown	3	0.0183734	1.46305
ARTHROv5_11685	ID:18395104	fbp	peptidyl-prolyl cis-trans isomerase	Posttranslational modification, protein turnover, chaperones	8	0.0171041	1.4544
ARTHROv5_10482	ID:18393901		Unknown	Function unknown	10	0.00991373	1.45418
ARTHROv5_11252	ID:18394671		conserved protein of Unknown function	Function unknown	3	0.0108059	1.44567
ARTHROv5_40035	ID:18396729	acnB	Aconitate hydratase 2	Energy production and conversion	17	0.000492138	1.44216
ARTHROv5_30080	ID:18395909	psaD	Photosystem I reaction center subunit II (Photosystem I 16 kDa polypeptide) (PSI-D)	Function unknown	18	0.0233916	1.44071
ARTHROv5_41359	ID:18398053		putative Aldose 1-epimerase	Carbohydrate transport and metabolism	2	0.0428268	1.43553
ARTHROv5_41000	ID:18397694	devR	two-component response regulator	Signal transduction mechanisms	5	0.00935478	1.43503
ARTHROv5_30047	ID:18395876	trxA1	Thioredoxin-1	Energy production and conversion	16	0.0302783	1.43269
ARTHROv5_60603	ID:18399108	metE	5-methyltetrahydropteroyltriglutamate--homocysteine methyltransferase	Amino acid transport and metabolism	24	0.000654687	1.42963
ARTHROv5_20153	ID:18395712		conserved hypothetical protein	Carbohydrate transport and metabolism	3	0.0398495	1.42842
ARTHROv5_10093	ID:18393512		Unknown	Function unknown	3	0.00554173	1.42746
ARTHROv5_50072	ID:18398208	rpsG	30S ribosomal subunit protein S7	Translation, ribosomal structure and biogenesis	10	0.00538806	1.41695
ARTHROv5_11717	ID:18395136	pepA	cytosol aminopeptidase	Amino acid transport and metabolism	7	0.032589	1.40971
ARTHROv5_40999	ID:18397693		Tetratricopeptide TPR_2 repeat protein	General function prediction only	2	0.00886499	1.40896
ARTHROv5_10661	ID:18394080		conserved protein of Unknown function	General function prediction only	18	0.0230401	1.40427
ARTHROv5_20091	ID:18395650		Putative band 7 family protein	Posttranslational modification, protein turnover, chaperones	12	0.022752	1.39716
ARTHROv5_40807	ID:18397501	sqr	Sulfide:quinone oxidoreductase	General function prediction only	7	0.0129313	1.39207
ARTHROv5_10666	ID:18394085	gatB	Aspartyl/glutamyl-tRNA(Asn/Gln) amidotransferase subunit B (Asp/Glu-ADT subunit B)	Translation, ribosomal structure and biogenesis	11	0.00674023	1.3837
ARTHROv5_11364	ID:18394783	recA	DNA strand exchange and recombination protein with protease and nuclease activity	Replication, recombination and repair	8	0.0275685	1.38272
ARTHROv5_61123	ID:18399628	msrB	methionine sulfoxide reductase B	Posttranslational modification, protein turnover, chaperones	8	0.00733316	1.37895
ARTHROv5_60163	ID:18398668	rplU	50S ribosomal protein L21	Translation, ribosomal structure and biogenesis	3	0.0455582	1.37863
ARTHROv5_11139	ID:18394558		putative Peptidyl-prolyl cis-trans isomerase, cyclophilin family	Posttranslational modification, protein turnover, chaperones	18	0.00391333	1.37729
ARTHROv5_60834	ID:18399339	glgB	1,4-alpha-glucan branching enzyme	Carbohydrate transport and metabolism	7	0.00934802	1.37369
ARTHROv5_60692	ID:18399197		Unknown	Function unknown	8	0.012239	1.36409
ARTHROv5_10081	ID:18393500	mreB	cell wall structural complex MreBCD, actin-like component MreB	Cell cycle control, cell division, chromosome partitioning	5	0.0294081	1.36351
ARTHROv5_11644	ID:18395063		conserved protein of Unknown function	Transcription	6	0.0267882	1.36332
ARTHROv5_60975	ID:18399480	ybbK	protease, membrane anchored , stomatin/prohibitin homologs	Posttranslational modification, protein turnover, chaperones	16	0.0376138	1.35588
ARTHROv5_10603	ID:18394022	ilvD	Dihydroxy-acid dehydratase	Amino acid transport and metabolism	8	0.0372768	1.35037
ARTHROv5_10293	ID:18393712	ppc	Phosphoenolpyruvate carboxylase	Energy production and conversion	5	0.00124853	1.33925
ARTHROv5_40022	ID:18396716	frr	ribosome recycling factor	Translation, ribosomal structure and biogenesis	12	0.00471712	1.33758
ARTHROv5_30826	ID:18396655	fabI	Enoyl-[acyl-carrier-protein] reductase [NADH]	Lipid transport and metabolism	3	0.00351633	1.33405
ARTHROv5_41076	ID:18397770		putative hydrolase	Cell wall/membrane/envelope biogenesis	6	0.0444863	1.33374
ARTHROv5_11007	ID:18394426	purH	Bifunctional purine biosynthesis protein purH [Includes: Phosphoribosylaminoimidazolecarboxamide formyltransferase ; IMP cyclohydrolase]	Nucleotide transport and metabolism	6	0.0421685	1.33014
ARTHROv5_11887	ID:18395306		putative L-asparaginase II	Amino acid transport and metabolism	3	0.0180289	1.3272
ARTHROv5_61197	ID:18399702		Unknown	Function unknown	16	0.0264309	1.32189
ARTHROv5_30787	ID:18396616	PepN	Peptidase M1, membrane alanine aminopeptidase	Amino acid transport and metabolism	8	0.0307337	1.31718
ARTHROv5_30489	ID:18396318		conserved hypothetical protein	Intracellular trafficking, secretion, and vesicular transport	35	0.00867177	1.31415
ARTHROv5_40288	ID:18396982		Alpha/beta hydrolase fold protein	General function prediction only	5	0.00947755	1.29709
ARTHROv5_30323	ID:18396152	pfkA1	6-phosphofructokinase I	Carbohydrate transport and metabolism	10	0.0385382	1.2969
ARTHROv5_10746	ID:18394165		putative Copper chaperone	Inorganic ion transport and metabolism	2	0.0438012	1.28897
ARTHROv5_60324	ID:18398829	aspS	aspartyl-tRNA synthetase	Translation, ribosomal structure and biogenesis	3	0.0328871	1.28776
ARTHROv5_30202	ID:18396031	ftsZ	cell division protein; tubulin-like GTP-binding protein and GTPase, forms circumferential ring in cell division	Cell cycle control, cell division, chromosome partitioning	17	0.0447919	1.27728
ARTHROv5_60192	ID:18398697		Unknown	Function unknown	6	0.00714018	1.277
ARTHROv5_10637	ID:18394056	apcA	Allophycocyanin alpha subunit	Energy production and conversion	28	0.0462727	1.26592
ARTHROv5_11549	ID:18394968	ssb	Single-stranded DNA-binding protein	Replication, recombination and repair	5	0.0274142	1.26385
ARTHROv5_60738	ID:18399243		putative Subtilisin-like serine protease	Posttranslational modification, protein turnover, chaperones	15	0.0346547	1.2408
ARTHROv5_40911	ID:18397605		putative ABC transporter, ATPase component of Unknown specificity	Defense mechanisms	6	0.0112704	1.2382
ARTHROv5_50078	ID:18398214	glsF	Ferredoxin-dependent glutamate synthase, large subunit	Amino acid transport and metabolism	15	0.0199135	1.23076
ARTHROv5_50064	ID:18398200		ribonuclease, RnE/RnG family	Translation, ribosomal structure and biogenesis	6	0.00838734	1.162
ARTHROv5_40690	ID:18397384		CRISPR-associated Csm3 family protein	Replication, recombination and repair	2	0.0459932	1.05806
ARTHROv5_40455	ID:18397149		conserved hypothetical protein	Cell cycle control, cell division, chromosome partitioning	165	0.0368809	0.831165
ARTHROv5_11034	ID:18394453	rplB	50S ribosomal subunit protein L2	Translation, ribosomal structure and biogenesis	9	0.0380922	0.81554
ARTHROv5_60651	ID:18399156	sir	Sulfite reductase [ferredoxin]	Inorganic ion transport and metabolism	10	0.0151578	0.795056
ARTHROv5_11045	ID:18394464	rplF	50S ribosomal subunit protein L6	Translation, ribosomal structure and biogenesis	6	0.0498669	0.79128
ARTHROv5_10197	ID:18393616	rplY	50S ribosomal protein L25 (General stress protein CTC)	Translation, ribosomal structure and biogenesis	3	0.0334345	0.776714
ARTHROv5_61181	ID:18399686	groL2	Cpn60 chaperonin GroEL, large subunit of GroESL	Posttranslational modification, protein turnover, chaperones	48	0.00160012	0.761961
ARTHROv5_11316	ID:18394735		putative transketolase	Carbohydrate transport and metabolism	26	0.0275155	0.761929
ARTHROv5_11522	ID:18394941		putative light repressed protein, LrtA-like	Translation, ribosomal structure and biogenesis	7	0.00568479	0.742488
ARTHROv5_50103	ID:18398239	acsA	Acetyl-coenzyme A synthetase	Lipid transport and metabolism	13	0.00273042	0.712449
ARTHROv5_11005	ID:18394424	tktA	transketolase 1, thiamin-binding	Carbohydrate transport and metabolism	20	0.00384962	0.701414
ARTHROv5_11556	ID:18394975	cpcC2	Phycobilisome 32 kDa linker polypeptide, phycocyanin-associated, rod 2	Energy production and conversion	34	0.00217171	0.691037
ARTHROv5_40496	ID:18397190		putative phosphoketolase	Carbohydrate transport and metabolism	6	0.000464863	0.687453
ARTHROv5_11553	ID:18394972	cpcB	C-phycocyanin beta subunit	C-phycocyanin beta subunit	41	0.0184488	0.664312
ARTHROv5_10239	ID:18393658	acpP	acyl carrier protein	Lipid transport and metabolism	5	0.00516014	0.656239
ARTHROv5_11327	ID:18394746	chlP	Geranylgeranyl hydrogenase	Energy production and conversion	7	0.00127182	0.646013
ARTHROv5_11660	ID:18395079	hemF	coproporphyrinogen III oxidase	Coenzyme transport and metabolism	9	0.00484269	0.612306
ARTHROv5_40069	ID:18396763	rpe	D-ribulose-5-phosphate 3-epimerase	Carbohydrate transport and metabolism	7	0.00157184	0.541597
ARTHROv5_40946	ID:18397640	acsF	Aerobic magnesium-protoporphyrin IX monomethyl ester [oxidative] cyclase (Aerobic Mg-protoporphyrin IX monomethyl ester oxidative cyclase)	Energy production and conversion	4	0.000377873	0.52515
ARTHROv5_60719	ID:18399224	sqdB	UDP-sulfoquinovose synthase	Carbohydrate transport and metabolism	3	0.000509677	0.393922
ARTHROv5_50129	ID:18398265	rca	Ribulose bisphosphate carboxylase/oxygenase activase	Posttranslational modification, protein turnover, chaperones	2	6.72082e-05	0.324001
ARTHROv5_11555	ID:18394974	cpcC1	Phycobilisome 32 kDa linker polypeptide, phycocyanin-associated, rod 1	Energy production and conversion	15	1.51564e-07	0.108366
